# Supplementary material for: Ferrocenyl chiral bisphosphorus ligands for highly enantioselective asymmetric hydrogenation via noncovalent ion pair interaction
Source: Royal Society of Chemistry journal article supplement (doi:10.1039/c6sc01845a), 2016-01-01
Supplement: c6sc01845a1.pdf [file c6sc01845a1.pdf]

## Supporting Information for

# Ferrocenyl Chiral Bisphosphorus Ligands for Highly Enantioselective Asymmetric Hydrogenation via the Noncovalent Ion Pair Interaction

Caiyou Chen,<sup>a</sup> Heng Wang,<sup>a</sup> Zhefan Zhang,<sup>a</sup> Shicheng Jin,<sup>a</sup> Songwei Wen,<sup>a</sup>  
Jianjian Ji,<sup>a</sup> Lung Wa Chung,<sup>b</sup> Xiu-Qin Dong\*<sup>a</sup>, and Xumu Zhang\*<sup>a, b</sup>

<sup>a</sup> College of Chemistry and Molecular Sciences, Wuhan University, Wuhan, Hubei, 430072, P. R. China

<sup>b</sup> Department of Chemistry, South University of Science and Technology of China, Shenzhen, 518055,  
P.R. China.

## Contents

|                                                                                      |    |
|--------------------------------------------------------------------------------------|----|
| General Remarks.....                                                                 | 2  |
| Synthesis ligands L1-L5.....                                                         | 2  |
| Data obtained under other reaction conditions .....                                  | 7  |
| General procedure for the hydrogenation of 2-aryl and 2-alkyl acrylic acids<br>..... | 9  |
| Characterization data of compounds 3a-3m .....                                       | 9  |
| NMR Spectra .....                                                                    | 16 |
| HPLC and GC results of compounds 3a-3m .....                                         | 40 |
| References.....                                                                      | 53 |

## General Remarks

All reactions were performed in the argon-filled glovebox or under nitrogen using standard Schlenk techniques, unless otherwise noted. Solvents were dried with standard procedures and degassed with N<sub>2</sub>. Column chromatography was performed using 200~400 mesh silica gel. Thin layer chromatography (TLC) was performed on EM reagents 0.25 mm silica 60-F plates. <sup>1</sup>H, <sup>13</sup>C, <sup>31</sup>P NMR spectrum were recorded on Bruker-400, with CDCl<sub>3</sub> as the solvent and tetramethylsilane (TMS) as the internal standard. Chemical shifts were reported in ppm, upfield to TMS (0.00 ppm) for and relative to CDCl<sub>3</sub> (7.26 ppm, 77.3 ppm) for <sup>1</sup>H NMR and <sup>13</sup>C NMR. HPLC analysis was conducted on an Agilent 1260 Series instrument. GC analysis was carried out on SHIMADZU Lab Solution using achiral capillary columns. High resolution mass spectrum was obtained on Thermo LTQ XL Orbitrap. Unless otherwise noted, all reagents and solvents were purchased from commercial suppliers and used without further purification. Substrates **2a** and **2j** were commercially available. Substrates **2b-2i**<sup>[1]</sup>, **2k**<sup>[2]</sup>, **2l**<sup>[3]</sup>, **2m**<sup>[4]</sup>, **4**<sup>[5]</sup> and **5**<sup>[6]</sup> were prepared according to the literature procedures.

## Synthesis ligands L1-L5

### 1. Synthesis of intermediate 1a

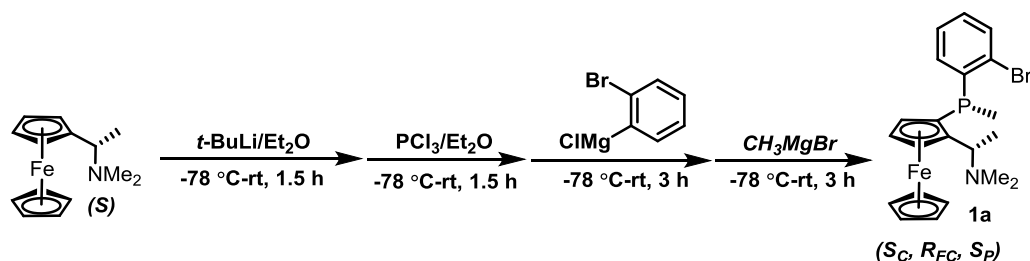

To an oven dried schlenk flask was added (*S*)-ugi's amine (10 mmol, 2.5715 g) and 20 mL of dry Et<sub>2</sub>O under N<sub>2</sub> atmosphere. The resulting solution was cooled to -78 °C and *t*-BuLi (11 mmol, 1.5 M in pentane, 7.6 mL) was added carefully and dropwise. After the addition, the solution was allowed to warm to room temperature (rt) and stirred for 1.5 h. The schlenk flask was cooled to -78 °C and PCl<sub>3</sub> (10 mmol, 1.0 mL) was added in one portion. The suspension was allowed to warm to rt and

stirred for 1.5 h. The schlenk flask was cooled to  $-78\text{ }^{\circ}\text{C}$  and (2-bromophenyl)magnesium chloride (11 mmol, prepared by treating 1-bromo-2-iodobenzene with *i*-PrMgCl in an 1:1 molar ratio under  $-40\text{ }^{\circ}\text{C}$  for 1 h in Et<sub>2</sub>O) was added dropwise and the resulting suspension was allowed to warm to rt and stirred for 1.5 h. The schlenk flask was cooled to  $-78\text{ }^{\circ}\text{C}$  again and CH<sub>3</sub>MgCl (11 mmol, 3 M in Et<sub>2</sub>O, 3.7 mL) was added dropwise. The resulting suspension was allowed to warm to rt and stirred for 3 h. Water (20 mL) was added into the schlenk flask and the solution was stirred for 10 min. The organic phase was separated and the water phase was extracted by ethyl acetate (50 mL X 3). The organic phases were combined, dried and concentrated under reduced pressure. The residue was purified by column chromatography to give the desired product **1a** as a yellow solid (2.79 g, 61% yield). <sup>1</sup>H NMR (400 MHz, CDCl<sub>3</sub>):  $\delta$  7.46-7.42 (m, 1H), 7.04-7.00 (m, 2H), 6.91 (d, *J* = 7.6 Hz, 1H), 4.42-4.37 (m, 3H), 4.16 (s, 5H), 4.12-4.06 (m, 1H), 1.69 (s, 6H), 1.56 (d, *J* = 4.4 Hz, 3H), 1.22 (d, *J* = 6.4 Hz, 3H) ppm; <sup>13</sup>C NMR (101 MHz, CDCl<sub>3</sub>)  $\delta$  144.85 (d, *J* = 13.5 Hz), 132.93, 131.75 (d, *J* = 2.9 Hz), 128.71, 127.72, 127.40, 126.42, 76.50 (d, *J* = 7.9 Hz), 70.10, 69.90 (d, *J* = 3.8 Hz), 69.73, 69.49 (d, *J* = 4.8 Hz), 68.24, 57.11 (d, *J* = 7.1 Hz), 39.07, 11.21 (d, *J* = 10.5 Hz) ppm; <sup>31</sup>P NMR (162 MHz, CDCl<sub>3</sub>):  $\delta$  -40.787 ppm. HRMS (ESI) calculated for C<sub>21</sub>H<sub>26</sub>BrFeNP<sup>+</sup> [M + H<sup>+</sup>]: 458.0330; found: 458.0330.

## 2. Synthesis of intermediate 1b

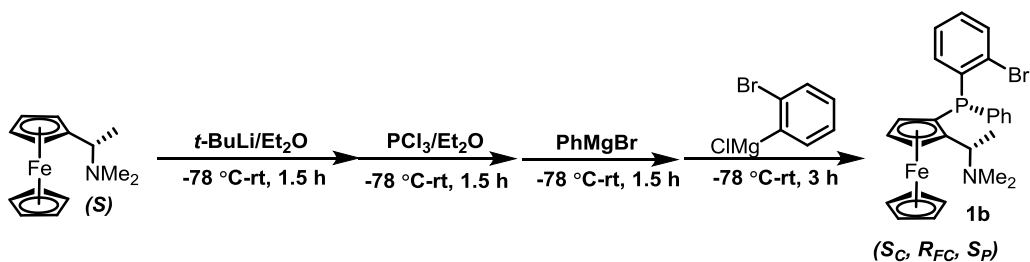

To an oven dried schlenk flask was added (*S*)-ugi's amine (10 mmol, 2.5715 g) and 20 mL of dry Et<sub>2</sub>O under N<sub>2</sub> atmosphere. The resulting solution was cooled to  $-78\text{ }^{\circ}\text{C}$  and *t*-BuLi (11 mmol, 1.5 M in pentane, 7.6 mL) was added carefully and dropwise. After the addition, the solution was allowed to warm to room temperature (rt) and stirred for 1.5 h. The schlenk flask was cooled to  $-78\text{ }^{\circ}\text{C}$  and PCl<sub>3</sub> (10 mmol,

1.0 mL) was added in one portion. The suspension was allowed to warm to rt and stirred for 1.5 h. The schlenk flask was cooled to -78 °C and PhMgCl (11 mmol, 2 M, 5.5 mL) was added dropwise. The schlenk flask was cooled to -78 °C and (2-bromophenyl)magnesium chloride (11 mmol, prepared by treating 1-bromo-2-iodobenzene with *i*-PrMgCl in an 1:1 molar ratio under -40 °C for 1 h in Et<sub>2</sub>O) was added dropwise and the resulting suspension was allowed to warm to rt and stirred for 1.5 h. The resulting suspension was allowed to warm to rt and stirred for 3 h. Water (20 mL) was added into the schlenk flask and the solution was stirred for 10 min. The organic phase was separated and the water phase was extracted by ethyl acetate (50 mL X 3). The organic phases were combined, dried and concentrated under reduced pressure. The residue was purified by column chromatography to give the desired product **1a** as a yellow solid (2.96 g, 57% yield). <sup>1</sup>H NMR (400 MHz, CDCl<sub>3</sub>) δ 7.70 (s, 1H), 7.35 (d, *J* = 6.9 Hz, 1H), 7.27 – 7.07 (m, 7H), 4.45 (s, 1H), 4.37 (s, 1H), 4.09 (s, 2H), 4.03 (s, 5H), 1.91 (s, 6H), 1.35 (d, *J* = 6.7 Hz, 3H), ppm; <sup>13</sup>C NMR (101 MHz, CDCl<sub>3</sub>): δ 141.87 (d, *J* = 11.4 Hz), 141.12 (d, *J* = 12.0 Hz), 137.84, 133.08 (d, *J* = 3.7 Hz), 132.33 (d, *J* = 18.8 Hz), 131.89 (d, *J* = 39.1 Hz), 130.61, 127.64 (d, *J* = 5.8 Hz), 127.16 (d, *J* = 18.2 Hz), 97.73 (d, *J* = 25.0 Hz), 75.86 (d, *J* = 15.1 Hz), 71.36 (d, *J* = 2.7 Hz), 69.95, 69.63 (d, *J* = 4.2 Hz), 69.16, 56.91 (d, *J* = 8.3 Hz), 39.90, 11.31 ppm; <sup>31</sup>P NMR (162 MHz, CDCl<sub>3</sub>): δ -22.86 (s) ppm. HRMS (ESI) calculated for C<sub>26</sub>H<sub>28</sub>BrFeNP<sup>+</sup> [M + H<sup>+</sup>]: 520.0487; found: 520.0487.

### 3. General procedure for the synthesis of ligands L1-L5

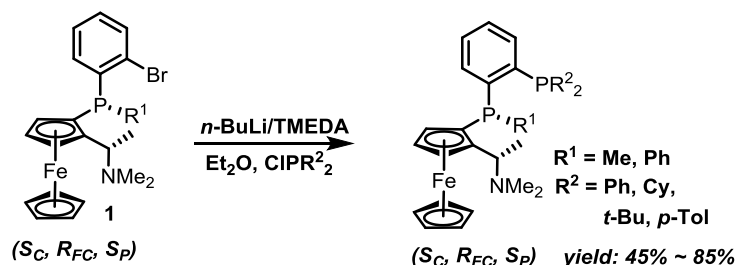

To an oven dried schlenk flask was added intermediate **1a** (3.0 mmol, 1.3746 g) or **1b** (3.0 mmol, 1.56 g), TMEDA (N<sup>1</sup>, N<sup>1</sup>, N<sup>2</sup>, N<sup>2</sup>-tetramethylethane-1, 2-diamine, 3.3 mmol, 383.5 mg) and 20 mL of dry Et<sub>2</sub>O under N<sub>2</sub> atmosphere. The resulting solution was cooled to -78 °C and *n*-BuLi (3.3 mmol, 2.3 M, 1.4 mL) was added dropwise.

The resulting solution was stirred at -78 °C for 1 h. The corresponding phosphine chloride was added dropwise at -78 °C and the resulting solution was allowed to warm to rt and stirred for 3 h. Water (20 mL) was added into the schlenk flask and the solution was stirred for 10 min. The organic phase was separated and the water phase was extracted by ethyl acetate (30 mL X 3). The organic phases were combined, dried and concentrated under reduced pressure. The residue was purified by column chromatography to give the desired ligands **L1-L5** as yellow solid.

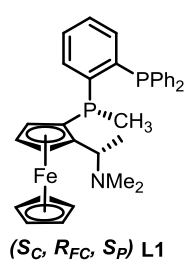

**L1:** Yellow solid, 1.40 g, 83% yield.  $[\alpha]_D^{20} = +1.3$  (c 0.4, CHCl<sub>3</sub>). <sup>1</sup>H NMR (400 MHz, CDCl<sub>3</sub>):  $\delta$  7.40 – 7.21 (m, 11H), 7.17 – 7.02 (m, 3H), 6.98 – 6.89 (m, 1H), 4.393 – 4.343 (m, 3H), 4.12 (s, 5H), 4.07 (dd, *J* = 6.7, 2.8 Hz, 1H), 1.66 (s, 6H), 1.30 (d, *J* = 4.5 Hz, 3H), 1.26 (d, *J* = 6.3 Hz, 3H) ppm; <sup>13</sup>C NMR (101 MHz, CDCl<sub>3</sub>):  $\delta$  134.14 (d, *J* = 19.5 Hz), 133.65 (d, *J* = 19.2 Hz), 133.33 (d, *J* = 6.6 Hz), 131.42 (d, *J* = 9.7 Hz), 128.38 (d, *J* = 3.0 Hz), 128.35 (d, *J* = 16.3 Hz), 128.22, 127.46, 77.52 (d, *J* = 52.7 Hz), 69.71, 69.59 (d, *J* = 4.9 Hz), 68.06 (d, *J* = 2.6 Hz), 56.85, 39.68, 12.70 (dd, *J* = 10.2, 1.8 Hz) ppm; <sup>31</sup>P NMR (162 MHz, CDCl<sub>3</sub>):  $\delta$  -16.79 (d, *J* = 164.5 Hz), -50.76 (d, *J* = 164.1 Hz) ppm. HRMS (ESI) calculated for C<sub>33</sub>H<sub>36</sub>FeNP<sub>2</sub><sup>+</sup> [*M* + H<sup>+</sup>]: 564.1667; found: 564.1667.

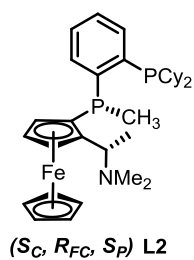

**L2:** Yellow solid, 1.47 g, 85% yield.  $[\alpha]_D^{20} = -53.0$  (c 0.4, CHCl<sub>3</sub>). <sup>1</sup>H NMR (400 MHz, CDCl<sub>3</sub>):  $\delta$  7.43 – 7.35 (m, 1H), 7.13 (td, *J* = 7.4, 1.2 Hz, 1H), 7.04 (t, *J* = 7.5 Hz, 1H), 6.91 (dt, *J* = 6.5, 2.7 Hz, 1H), 4.43 (s, 1H), 4.40 (t, *J* = 2.3 Hz, 1H), 4.30 (s, 1H), 4.15 (s, 5H), 3.98 (dd, *J* = 6.7, 3.2 Hz, 1H), 1.77 (s, 6H), 1.64 (d, *J* = 4.2 Hz, 4H), 1.32 (d, *J* = 6.7 Hz, 3H), 1.27 – 2.06 (m, 10H) ppm; <sup>13</sup>C NMR (101 MHz, CDCl<sub>3</sub>):  $\delta$  153.23 (dd, *J* = 31.9, 14.4 Hz), 137.77 (dd, *J* = 26.9, 14.9 Hz), 131.73, 131.14 (d, *J* = 8.9 Hz), 127.85, 126.43, 97.48 (d, *J* = 25.3 Hz), 78.08 (dd, *J* = 14.3, 12.0 Hz), 70.22 (dd, *J* = 4.6, 2.6 Hz), 69.68, 68.34, 60.44, 56.77 (d, *J* = 8.4 Hz), 40.31, 36.26 (dd, *J* = 13.8, 3.0 Hz), 33.97 (dd, *J* = 12.5, 5.1 Hz), 30.82 – 30.48 (m), 30.28 (d,

$J = 11.7$  Hz), 28.72 (d,  $J = 5.6$  Hz), 27.40 (dd,  $J = 7.5, 2.8$  Hz), 27.34 (d,  $J = 41.4$  Hz), 27.25, 26.49 (d,  $J = 7.2$  Hz), 21.11, 14.24, 13.49 (dd,  $J = 10.1, 5.9$  Hz), 11.81 ppm;  $^{31}\text{P}$  NMR (162 MHz,  $\text{CDCl}_3$ ):  $\delta$  -13.73 (d,  $J = 147.0$  Hz), -48.37 (d,  $J = 147.1$  Hz) ppm. HRMS (ESI) calculated for  $\text{C}_{33}\text{H}_{48}\text{FeNP}_2^+$  [ $\text{M} + \text{H}^+$ ]: 576.2606; found: 576.2606.

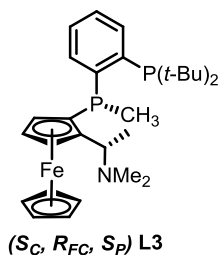

**L3:** Yellow solid, 707 mg, 45% yield.  $[\alpha]_{\text{D}}^{20} = +34.1$  (c 0.4,  $\text{CHCl}_3$ ).  $^1\text{H}$  NMR (400 MHz,  $\text{CDCl}_3$ ):  $\delta$  7.34 (td,  $J = 7.7, 1.7$  Hz, 2H), 7.19 – 7.15 (m, 2H), 4.35 (dd,  $J = 8.6, 1.4$  Hz, 2H), 4.30 – 4.20 (m, 4H), 4.17 (dd,  $J = 2.2, 1.0$  Hz, 1H), 4.14 (t,  $J = 4.6$  Hz, 1H), 4.08 (dd,  $J = 6.7, 2.3$  Hz, 1H), 1.68 (s, 6H), 1.58 (d,  $J = 4.5$  Hz, 3H), 1.20 (dd,  $J = 14.0, 11.2$  Hz, 21H) ppm;  $^{13}\text{C}$  NMR (101 MHz,  $\text{CDCl}_3$ )  $\delta$  143.40 (d,  $J = 10.7$  Hz), 134.99 (d,  $J = 21.1$  Hz), 131.47 (d,  $J = 19.0$  Hz), 127.40 (d,  $J = 7.1$  Hz), 127.33, 77.69 (d,  $J = 8.3$  Hz), 74.09 (d,  $J = 12.9$  Hz), 73.29 (d,  $J = 10.8$  Hz), 72.74 (dd,  $J = 3.0, 1.5$  Hz), 72.45 – 72.25 (m), 71.54, 71.31 (d,  $J = 3.7$  Hz), 70.82 (d,  $J = 5.6$  Hz), 70.09, 69.72, 57.02 (d,  $J = 6.5$  Hz), 38.68, 32.75 (dd,  $J = 20.4, 6.7$  Hz), 30.84 (dd,  $J = 13.1, 10.4$  Hz), 13.16 (dd,  $J = 9.3, 1.6$  Hz) ppm;  $^{31}\text{P}$  NMR (162 MHz,  $\text{CDCl}_3$ ):  $\delta$  26.96 (s), -44.92 (s) ppm. HRMS (ESI) calculated for  $\text{C}_{29}\text{H}_{44}\text{FeNP}_2^+$  [ $\text{M} + \text{H}^+$ ]: 524.2293; found: 524.2293.

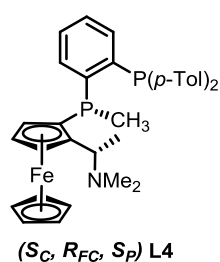

**L4:** Yellow solid, 1.28 g, 72% yield.  $[\alpha]_{\text{D}}^{20} = +25.5$  (c 0.2,  $\text{CHCl}_3$ ).  $^1\text{H}$  NMR (400 MHz,  $\text{CDCl}_3$ ):  $\delta$  7.24 – 7.01 (m, 11H), 6.952 – 6.917 (m, 1H), 4.43 – 4.33 (m, 3H), 4.13 (s, 3H), 4.05 (dd,  $J = 4.5, 2.2$  Hz, 1H), 2.35 (d,  $J = 8.4$  Hz, 6H), 1.67 (s, 6H), 1.39 – 1.13 (m, 7H) ppm;  $^{13}\text{C}$  NMR (101 MHz,  $\text{CDCl}_3$ ):  $\delta$  138.57, 138.33, 135.09 (dd,  $J = 11.5, 8.7$  Hz), 134.71 (dd,  $J = 9.9, 2.9$  Hz), 134.34 (d,  $J = 19.7$  Hz), 133.91 (d,  $J = 19.4$  Hz), 133.44 (d,  $J = 6.4$  Hz), 131.62 (dd,  $J = 7.7, 2.4$  Hz), 129.45 (t,  $J = 7.0$  Hz), 128.41, 127.70, 78.13 (dd,  $J = 23.5, 11.6$  Hz), 70.69, 70.40, 69.98, 69.83 (dd,  $J = 4.8, 1.8$  Hz), 68.41, 57.17 (d,  $J = 7.6$  Hz), 40.03, 21.60 (d,  $J = 4.5$  Hz), 13.04 (dd,  $J = 10.4, 1.7$  Hz) ppm;  $^{31}\text{P}$  NMR (162 MHz,  $\text{CDCl}_3$ ):  $\delta$  -18.51 (d,  $J$



<sup>a</sup>The reaction was conducted in 0.1 mmol scale in 1 mL of solvents, [Rh(NBD)<sub>2</sub>]BF<sub>4</sub> (NBD = norbornadiene) was used as metal precursor, Wudaphos was used as the ligand, S/C = 100, L/Rh = 1.1:1, temperature = rt, H<sub>2</sub> pressure = 10 bar, reaction time = 6 h. <sup>b</sup>Substrate conversion, determined by <sup>1</sup>H NMR. <sup>c</sup>Enantiomeric excess of **3a**, determined by chiral HPLC after treating **3a** with CH<sub>2</sub>N<sub>2</sub>.

Table 2. Screening of metal precursors and H<sub>2</sub> pressure using **2a** as the standard substrate <sup>a</sup>

| Entry | Metal precursor                        | P (bar) <sup>b</sup> | Conversion (%) <sup>c</sup> | Ee (%) <sup>d</sup> |
|-------|----------------------------------------|----------------------|-----------------------------|---------------------|
| 1     | [Rh(NBD) <sub>2</sub> ]BF <sub>4</sub> | 10                   | >99                         | 98                  |
| 2     | [Rh(COD) <sub>2</sub> ]BF <sub>4</sub> | 10                   | >99                         | 97                  |
| 3     | [Rh(COD)Cl] <sub>2</sub>               | 10                   | >99                         | 97                  |
| 4     | [Ir(COD)Cl] <sub>2</sub>               | 10                   | 66                          | -5                  |
| 5     | RuCl <sub>2</sub> Ph                   | 10                   | >99                         | 16                  |
| 6     | [Rh(NBD) <sub>2</sub> ]BF <sub>4</sub> | 20                   | >99                         | 98                  |
| 7     | [Rh(NBD) <sub>2</sub> ]BF <sub>4</sub> | 1                    | >99                         | 98                  |

<sup>a</sup>The reaction was conducted in 0.1 mmol scale in 1 mL of solvents EtOH, Wudaphos was used as the ligand, L/M = 1.1:1, S/C = 100, temperature = rt, reaction time = 6 h. <sup>c</sup>Substrate conversion, determined by <sup>1</sup>H NMR. <sup>d</sup>Enantiomeric excess of **3a**, determined by chiral HPLC after treating the **3a** with CH<sub>2</sub>N<sub>2</sub>.

Using Wudaphos as the optimized ligand, solvent effects were investigated using **2a** as the standard substrate. As depicted in Table 1, solvent has a significant influence on the reactivity and enantioselectivity for the hydrogenation of **2a**. It was found that only the polar protic alcohol solvents give excellent results in high activity and enantioselectivity (Table 1, entries 1-4). For the other polar aprotic or nonpolar aprotic solvents, low activity and enantioselectivity were observed (Table 1, entries 5-11). These results suggested that there probably existed the hydrogen bond effect among the protic solvent, the acid substrate and the ligand (Scheme 1). And the interaction of the substrate and ligand could be adjusted by the hydrogen bond effect to give the high efficiency of the catalyst; otherwise, unsatisfactory results were obtained. Subsequently, metal precursors and H<sub>2</sub> pressure were also screened in order to determine the optimized reaction conditions. The results were listed in table 2.



[Rh(NBD)<sub>2</sub>]BF<sub>4</sub> was selected as the optimized precursor for the slightly better *ee* obtained compared with the other two rhodium precursors. We further found that H<sub>2</sub> pressure had little effect on both the conversion and *ee* when the reaction was conducted using 1 mol% catalyst loading. The reaction proceeded smoothly with 1 bar of H<sub>2</sub> pressure with excellent *ee*. As a result, conditions in entry 7, Table 2 was selected as the optimized for the further investigations.

## General procedure for the hydrogenation of 2-aryl and 2-alkyl acrylic acids

In an argon-filled glove box, [Rh(NBD)<sub>2</sub>]BF<sub>4</sub> (0.01 mmol) and Wudaphos (0.011 mmol) were dissolved in EtOH (1 mL) and stirred for 30 min. 0.1 mL of the resulting solution was transferred by syringe into the vials charged with different substrates (0.1 mmol for each). Additional EtOH was added to bring the total reaction volume to 1 mL. The vials were subsequently transferred into an autoclave which was charged with hydrogen (1 bar). The reaction was then stirred at rt for 6 h. The hydrogen gas was released slowly and carefully in a well-ventilated hood. The solution was passed through a short column of silica gel (eluent: EtOAc) to remove the metal complex and concentrated to give compounds **3**. The *ee* values of compounds **3** were then determined by HPLC analysis on a chiral stationary phase after treating the products by using CH<sub>2</sub>N<sub>2</sub>.

## Characterization data of compounds 3a-3m

According to the above mentioned procedure, compounds **3a-3m** can be obtained. Characterization data are as follows.

(*S*)-2-phenylpropanoic acid, **3a**

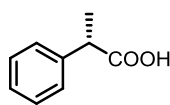

**3a**

>99% conv., 98% ee, white solid.;  $[\alpha]_D^{20} = +69.2$  (c 0.322, CHCl<sub>3</sub>)  $[[\alpha]_D^{20} = +71.5$  (c 2.0, CHCl<sub>3</sub>) for optically pure *S*-isomer]<sup>8</sup>; <sup>1</sup>H NMR (500 MHz, CDCl<sub>3</sub>):  $\delta = 7.31-7.25$  (m, 5H), 3.73 (q,  $J = 7.2$  Hz, 1H), 1.50 (d,  $J = 7.2$  Hz, 3H) ppm; <sup>13</sup>C NMR (126 MHz, CDCl<sub>3</sub>):  $\delta$  180.85, 140.11, 128.95, 127.89, 127.64, 45.69, 18.41. The enantiomeric excess of **3a** was determined by chiral HPLC analysis on Chiralpak OJ-H column after esterification with CH<sub>2</sub>N<sub>2</sub>. Conditions: hexane/isopropanol = 99 :1, flow rate = 1.0 mL/min, uv-vis detection at  $\lambda = 205$  nm,  $t_R = 15.0$  min (major), 18.9 min (minor).

(*S*)-2-(*p*-tolyl)propanoic acid, **3b**

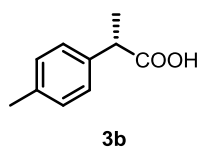

>99% conv., 98% ee, colorless oil;  $[\alpha]_D^{20} = +57.3$  (c 0.26, CHCl<sub>3</sub>)  $[[\alpha]_D^{20} = +66.4$  (c 0.71, CHCl<sub>3</sub>) for 100% ee, *S*-isomer]<sup>9</sup>; <sup>1</sup>H NMR (500 MHz, CDCl<sub>3</sub>):  $\delta = 8.98$  (s, br, 1H), 7.19 (d,  $J = 8.4$  Hz, 2H), 7.12 (d,  $J = 8.0$  Hz, 2H), 3.68 (q,  $J = 6.8$  Hz, 1H), 2.31 (s, 3H), 1.47 (d,  $J = 7.2$  Hz, 3H) ppm; <sup>13</sup>C NMR (126 MHz, CDCl<sub>3</sub>):  $\delta$  180.95, 137.27, 137.22, 129.62, 127.74, 45.29, 21.32, 18.43 ppm. The enantiomeric excess of **3b** was determined by chiral HPLC analysis on Chiralpak OJ-H column after esterification with CH<sub>2</sub>N<sub>2</sub>. Conditions: hexane/isopropanol = 99 :1, flow rate = 1.0 mL/min, uv-vis detection at  $\lambda = 220$  nm,  $t_R = 14.3$  min (minor), 16.9 min (major).

(*S*)-2-(*m*-tolyl)propanoic acid, **3c**

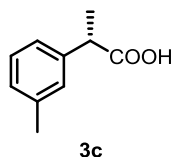

>99% conv., 98% ee, colorless oil;  $[\alpha]_D^{20} = +61.3$  (c 0.256, CHCl<sub>3</sub>)  $[[\alpha]_D^{24} = +64.0$  (c 1.0, CHCl<sub>3</sub>) for 92% ee, *S*-isomer]<sup>12</sup>. <sup>1</sup>H NMR (500 MHz, CDCl<sub>3</sub>):  $\delta$ : 7.21-7.18 (m, 1H); 7.11-7.06 (m, 3H); 3.68 (ddd,  $J_1 = J_2 - J_3 = 7.5$  Hz, 1H); 2.33 (s, 3H); 1.48 (d,  $J=7.5$  Hz, 3H) ppm; <sup>13</sup>C NMR (126 MHz, CDCl<sub>3</sub>):  $\delta$  180.93, 140.12, 138.60, 128.84, 128.61, 128.39, 124.89, 45.66, 21.68, 18.42 ppm. The enantiomeric

excess of **3c** was determined by chiral HPLC analysis on Chiralpak OJ-H column after esterification with  $\text{CH}_2\text{N}_2$ . Conditions: hexane/isopropanol = 99 :1, flow rate = 1.0 mL/min, uv-vis detection at  $\lambda = 220$  nm,  $t_{\text{R}} = 11.7$  min (major), 17.1 min (minor).

(*S*)-2-(4-(tert-butyl)phenyl)propanoic acid, **3d**

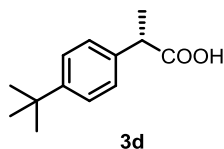

>99% conv., 97% ee, white solid;  $[\alpha]_{\text{D}}^{20} = +35.2$  (c 0.352,  $\text{CHCl}_3$ )  $[[\alpha]_{\text{D}}^{25} = +129.0$  (c 0.25,  $\text{CHCl}_3$ ) for 90% ee, *S*-isomer]<sup>13</sup>;  $^1\text{H}$  NMR (500 MHz, DMSO): 12.27 (br, 1H), 7.34-7.32 (m, 2H), 7.25-7.23 (m, 2H), 3.79 (q,  $J = 7.0$  Hz, 1H), 1.48 (d,  $J = 7.0$  Hz, 3H), 1.30 (s, 9H) ppm;  $^{13}\text{C}$  NMR (126 MHz,  $\text{CDCl}_3$ )  $\delta$  180.98, 150.46, 137.05, 127.52, 125.84, 45.20, 34.73, 31.61, 18.37 ppm. The enantiomeric excess of **3d** was determined by chiral HPLC analysis on Chiralpak OJ-H column after esterification with  $\text{CH}_2\text{N}_2$ . Conditions: hexane/isopropanol = 99 :1, flow rate = 1.0 mL/min, uv-vis detection at  $\lambda = 220$  nm,  $t_{\text{R}} = 7.2$  min (minor), 8.7 min (major).

(*S*)-2-(4-methoxyphenyl)propanoic acid, **3e**

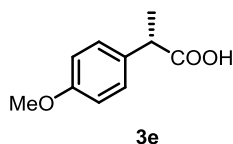

>99% conv., 98% ee, white solid;  $[\alpha]_{\text{D}}^{20} = +45.1$  (c 0.264,  $\text{CHCl}_3$ )  $[[\alpha]_{\text{D}}^{20} = -76.3$  (c 1.02,  $\text{CHCl}_3$ ) for 95% ee, *R*-isomer]<sup>10</sup>;  $^1\text{H}$  NMR (500 MHz,  $\text{CDCl}_3$ ):  $\delta = 7.82$  (s, br, 1H), 7.22 (d,  $J = 8.8$  Hz, 2H), 6.84 (d,  $J = 8.4$  Hz, 2H), 3.77 (s, 3H), 3.66 (q,  $J = 5.6$  Hz, 1H), 1.46 (d,  $J = 6.8$  Hz, 3H) ppm;  $^{13}\text{C}$  NMR (126 MHz,  $\text{CDCl}_3$ ):  $\delta$  181.05, 159.08, 132.36, 128.88, 114.31, 55.52, 44.88, 18.48 ppm. The enantiomeric excess of **3e** was determined by chiral HPLC analysis on Chiralpak OJ-H column after esterification with  $\text{CH}_2\text{N}_2$ . Conditions: hexane/isopropanol = 99 :1, flow rate = 1.0 mL/min, uv-vis detection at  $\lambda = 220$  nm,  $t_{\text{R}} = 27.3$  min (major), 30.1 min (minor).

(*S*)-2-(4-chlorophenyl)propanoic acid, **3f**

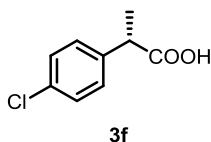

>99% conv., 96% ee, white solid;  $[\alpha]_{\text{D}}^{20} = +45.3$  (c 0.316,  $\text{CHCl}_3$ )  $[[\alpha]_{\text{D}}^{20} = +66.3$  (c 0.9,  $\text{CHCl}_3$ ) for 98% ee, *S*-isomer]<sup>9</sup>; <sup>1</sup>H NMR (500 MHz,  $\text{CDCl}_3$ ):  $\delta = 7.28\text{-}7.24$  (m, 2H), 7.01-6.98 (m, 2H), 3.69 (q,  $J = 7.2$  Hz, 1H), 1.47 (d,  $J = 7.2$  Hz, 3H) ppm; <sup>13</sup>C NMR (126 MHz,  $\text{CDCl}_3$ ):  $\delta$  180.81, 163.35, 161.39, 135.83, 135.80, 129.48, 129.42, 115.85, 115.68, 44.99, 18.52 ppm. The enantiomeric excess of **3f** was determined by chiral HPLC analysis on Chiralpak OJ-H column after esterification with  $\text{CH}_2\text{N}_2$ . Conditions: hexane/isopropanol = 99 :1, flow rate = 1.0 mL/min, uv-vis detection at  $\lambda = 210$  nm,  $t_{\text{R}} = 10.7$  min (minor), 11.7 min (major).

(*S*)-2-(3-chlorophenyl)propanoic acid, **3g**

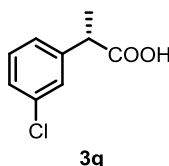

>99% conv., 98% ee, white solid;  $[\alpha]_{\text{D}}^{20} = +49.8$  (c 0.312,  $\text{CHCl}_3$ )  $[[\alpha]_{\text{D}}^{20} = +53.9$  (c 1.2,  $\text{CHCl}_3$ ) for 97% ee, *S*-isomer]<sup>9</sup>; <sup>1</sup>H NMR (500 MHz,  $\text{CDCl}_3$ ):  $\delta = 7.29\text{-}7.17$  (m, 4H), 3.67 (q,  $J = 7.2$  Hz, 1H), 1.46 (d,  $J = 7.2$  Hz, 3H) ppm; <sup>13</sup>C NMR (126 MHz,  $\text{CDCl}_3$ ):  $\delta$  180.21, 142.11, 134.72, 130.15, 128.14, 127.82, 126.16, 45.53, 18.34 ppm. The enantiomeric excess of **3g** was determined by chiral HPLC analysis on Chiralpak OJ-H column after esterification with  $\text{CH}_2\text{N}_2$ . Conditions: hexane/isopropanol = 99 :1, flow rate = 1.0 mL/min, uv-vis detection at  $\lambda = 210$  nm,  $t_{\text{R}} = 8.8$  min (major), 9.3 min (minor).

(*S*)-2-(4-fluorophenyl)propanoic acid, **3h**

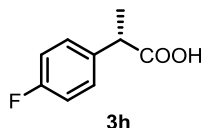

>99% conv., 96% ee, white solid;  $[\alpha]_{\text{D}}^{20} = +40.7$  (c 0.256,  $\text{CHCl}_3$ )  $[[\alpha]_{\text{D}}^{20} = +53.5$  (c 0.62,  $\text{CHCl}_3$ ) for 98% ee, *S*-isomer]<sup>9</sup>; <sup>1</sup>H NMR (500 MHz,  $\text{CDCl}_3$ ):  $\delta = 8.27$  (s, br, 1H), 7.28-7.25 (m, 2H), 7.01-6.97 (m, 2H), 3.70 (q,  $J = 7.2$  Hz, 1H), 1.47 (d,  $J = 7.2$

Hz, 3H);  $^{13}\text{C}$  NMR (126 MHz,  $\text{CDCl}_3$ ):  $\delta$  180.75, 162.36 (d,  $J = 245.8$  Hz), 135.85 (d,  $J = 3.0$  Hz), 129.44 (d,  $J = 8.0$  Hz), 115.75 (d,  $J = 21.4$  Hz), 45.00, 18.52 ppm. The enantiomeric excess of **3h** was determined by chiral HPLC analysis on Chiralpak OJ-H column after esterification with  $\text{CH}_2\text{N}_2$ . Conditions: hexane/isopropanol = 99 : 1, flow rate = 1.0 mL/min, uv-vis detection at  $\lambda = 220$  nm,  $t_{\text{R}} = 10.8$  min (major), 11.5 min (minor).

(*S*)-4-methoxy-2-methyl-4-oxobutanoic acid, **3i**

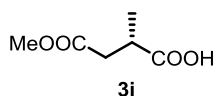

>99% conv., 92% ee, colorless oil;  $[\alpha]_{\text{D}}^{20} = -8.3$  ( $c$  0.202,  $\text{CHCl}_3$ )  $[[\alpha]_{\text{D}}^{20} = +9.0$  ( $c$  0.9,  $\text{CHCl}_3$ ) for 97% ee, *R*-isomer]<sup>7</sup>;  $^1\text{H}$  NMR (400 MHz,  $\text{CDCl}_3$ ) 9.36 (brs, 1H), 3.70 (s, 3H,  $\text{CH}_3$ ), 2.96 (sextet,  $J = 7.2$  Hz, 1H), 2.74 (dd,  $J = 16.4$  and 8.0 Hz, 1H), 2.43 (dd,  $J = 16.4$  and 6.0 Hz, 1H), 1.26 (d,  $J = 7.2$  Hz, 3H) ppm;  $^{13}\text{C}$  NMR (101 MHz,  $\text{CDCl}_3$ ):  $\delta$  181.77, 172.51, 52.12, 37.29, 35.90, 17.09 ppm. The enantiomeric excess of **3i** was determined by chiral GC analysis on Chiral  $\beta$ -dex225 column after esterification with  $\text{CH}_2\text{N}_2$ . Conditions: oven temperature = 250 °C, column temperature = 80-220 °C, programming rate = 5 °C/min, detector temperature = 260 °C,  $\text{N}_2$  flow rate = 1.0 mL/min,  $t_{\text{R}} = 13.6$  min (major), 14.0 min (minor).

(*S*)-2-methyl-3-phenylpropanoic acid, **3j**

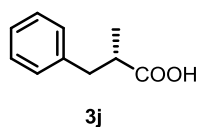

>99% conv., 80% ee, colorless oil;  $[\alpha]_{\text{D}}^{20} = +20.1$  ( $c$  0.358,  $\text{CHCl}_3$ )  $[[\alpha]_{\text{D}}^{25} = -27.0$  ( $c$  1.00,  $\text{CHCl}_3$ ) for 98% ee, *R*-isomer]<sup>7</sup>;  $^1\text{H}$  NMR (500 MHz,  $\text{CDCl}_3$ ):  $\delta = 9.47$  (s, br, 1H), 7.33-7.21 (m, 5H), 3.12 (dd,  $J = 13.2$ , 6.0 Hz, 1H), 2.82-2.78 (m, 1H), 2.72-2.68 (m, 1H), 1.21 (d,  $J = 6.8$  Hz, 3H) ppm;  $^{13}\text{C}$  NMR (126 MHz,  $\text{CDCl}_3$ ):  $\delta$  182.73, 139.38, 129.29, 128.69, 126.68, 41.61, 39.61, 16.75 ppm. The enantiomeric excess of **3j** was determined by chiral HPLC analysis on Chiralpak OJ-H column after esterification with  $\text{CH}_2\text{N}_2$ . Conditions: hexane/isopropanol = 99 : 1, flow rate = 1.0 mL/min, uv-vis detection at  $\lambda = 205$  nm,  $t_{\text{R}} = 9.1$  min (minor), 9.9 min (major).

(*S*)-2-(4-isobutylphenyl)propanoic acid, **3k**

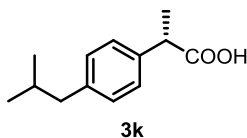

>99% conv., 97% ee, white solid;  $[\alpha]_{\text{D}}^{20} = +49.8$  (*c* 0.368,  $\text{CHCl}_3$ )  $[[\alpha]_{\text{D}}^{20} = -45.4$  (*c* 1.00,  $\text{CHCl}_3$ ) for 82% ee, *R*-isomer]<sup>11</sup>; <sup>1</sup>H NMR (500 MHz,  $\text{CDCl}_3$ ):  $\delta = 7.21$  (d, *J* = 8.0 Hz, 2H), 7.09 (d, *J* = 8.0 Hz, 2H), 3.70 (q, *J* = 7.2 Hz, 1H), 2.44 (d, *J* = 7.2 Hz, 2H), 1.89-1.78 (heptet, *J* = 6.8 Hz, 1H), 1.49 (d, *J* = 7.2 Hz, 3H), 0.89 (d, *J* = 6.8 Hz, 6H) ppm; <sup>13</sup>C NMR (126 MHz,  $\text{CDCl}_3$ ):  $\delta$  180.77, 140.77, 137.15, 129.37, 127.30, 45.06, 30.16, 22.40, 18.16 ppm. The enantiomeric excess of **3k** was determined by chiral HPLC analysis on Chiralpak OJ-H column after esterification with  $\text{CH}_2\text{N}_2$ . Conditions: hexane/isopropanol = 99 : 1, flow rate = 1.0 mL/min, uv-vis detection at  $\lambda = 210$  nm,  $t_{\text{R}} = 7.2$  min (major), 7.9 min (minor).

(*S*)-2-(6-methoxynaphthalen-2-yl)propanoic acid, **3l**

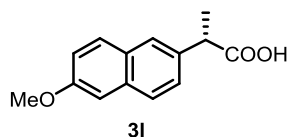

>99% conv., 99% ee, white solid;  $[\alpha]_{\text{D}}^{20} = +49.5$  (*c* 0.41,  $\text{CHCl}_3$ )  $[[\alpha]_{\text{D}}^{20} = +65.0$  (*c* 1.0,  $\text{CHCl}_3$ ) for optically pure *S*-isomer]<sup>7</sup>; <sup>1</sup>H NMR (400 MHz,  $\text{CDCl}_3$ ):  $\delta = 7.70$  (s, 1H), 7.67 (s, 2H), 7.40 (dd, *J* = 8.4, 1.6 Hz, 1H), 7.12 (dd, *J* = 8.8, 2.4 Hz, 1H), 7.09 (d, *J* = 2.0 Hz, 1H), 3.90 (s, 3H), 3.86 (q, *J* = 6.8 Hz, 1H), 1.57 (d, *J* = 7.2 Hz, 3H) ppm; <sup>13</sup>C NMR (101 MHz,  $\text{CDCl}_3$ ):  $\delta$  181.15, 157.93, 135.12, 134.06, 129.57, 129.13, 127.49, 126.46, 126.41, 119.31, 105.81, 55.56, 45.54, 18.38 ppm. The enantiomeric excess of **3l** was determined by chiral HPLC analysis on Chiralpak OJ-H column after esterification with  $\text{CH}_2\text{N}_2$ . Conditions: hexane/isopropanol = 90:10, flow rate = 1.0 mL/min, uv-vis detection at  $\lambda = 210$  nm,  $t_{\text{R}} = 25.3$ min (minor), 26.2 min (major).

(*S*)-3-hydroxy-2-methylpropanoic acid, **3m**

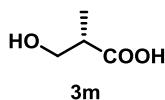

>99% conv., 95% ee, colorless oil;  $[\alpha]_D^{20} = +10.1$  (c 0.186, CHCl<sub>3</sub>)  $[[\alpha]_D^{20} = +12.72$  (c 12.5, EtOH) for optically pure *S*-isomer]<sup>14</sup>; <sup>1</sup>H NMR (400 MHz, CDCl<sub>3</sub>)  $\delta = 4.16$ - $3.95$  (m, 2H),  $2.59$ - $2.51$  (m, 1H),  $1.18$  (d,  $J = 7.2$  Hz, 3H). The enantiomeric excess of **3i** was determined by chiral GC analysis on Chiral CB column after esterification with CH<sub>2</sub>N<sub>2</sub>. Conditions: oven temperature = 230 °C, column temperature = 90-190 °C (rate = 5 °C/min), detector temperature = 240 °C, N<sub>2</sub> flow rate = 1.0 mL/min,  $t_R = 6.4$  min (major), 6.6 min (minor).

# NMR Spectra

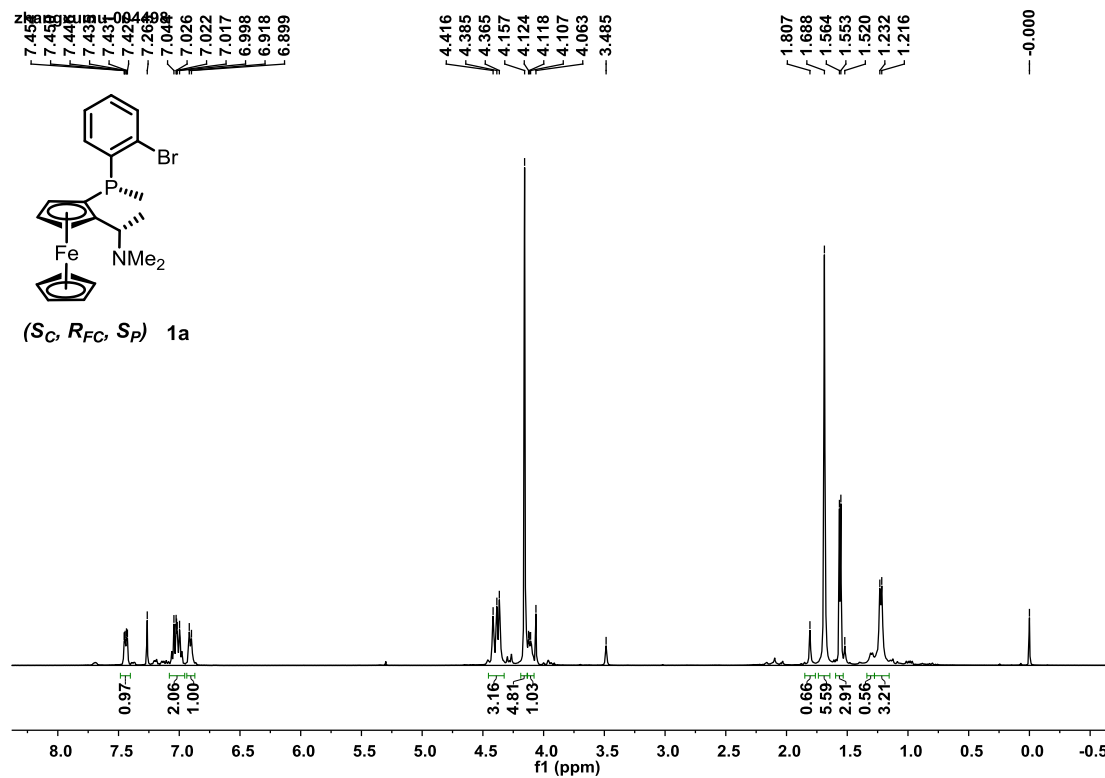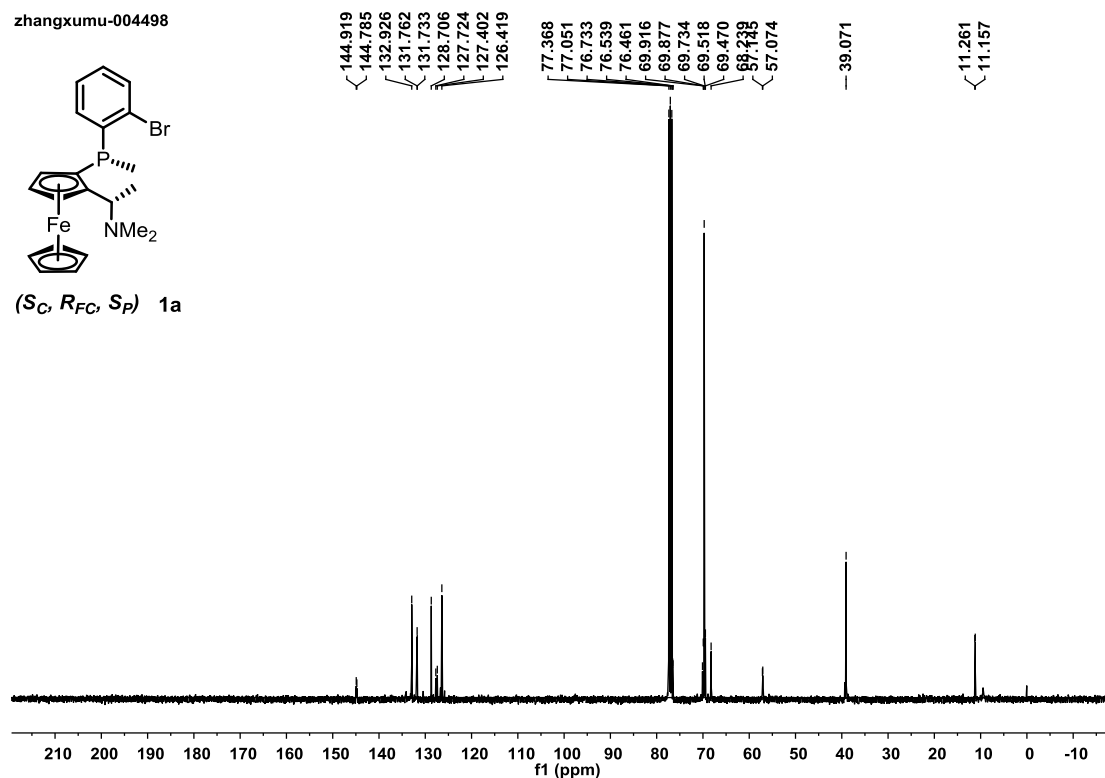



zhangxumu-004498

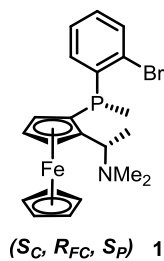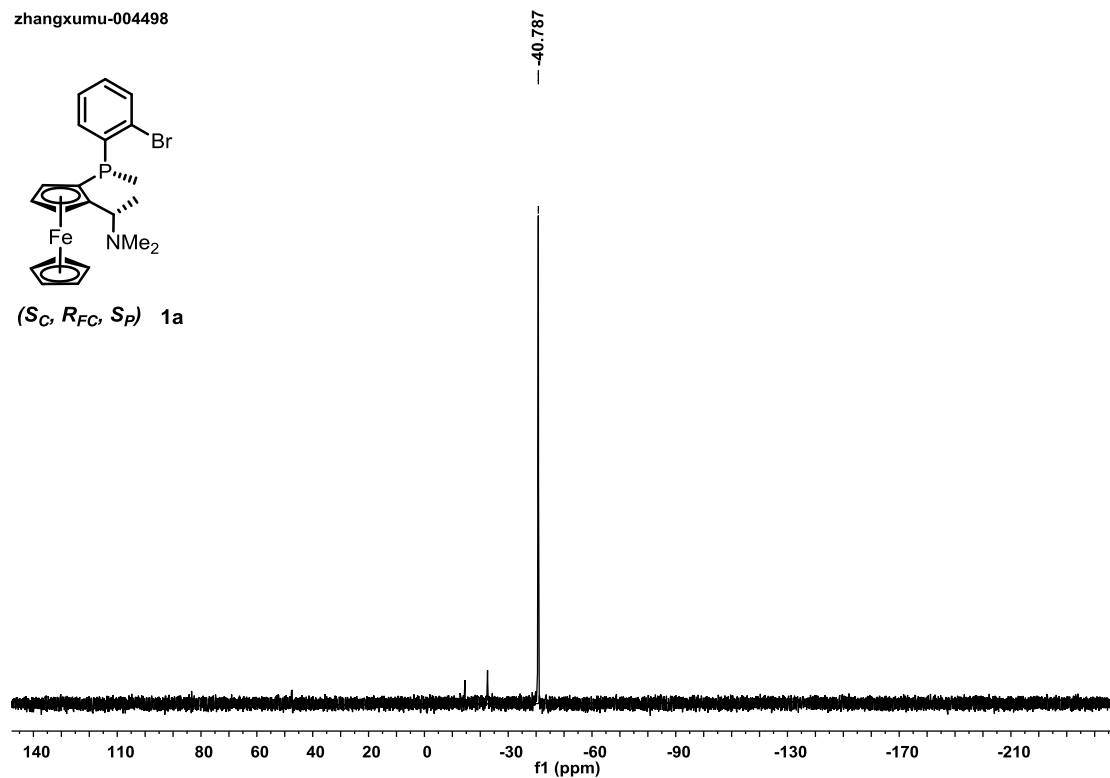

zhangxumu-004498

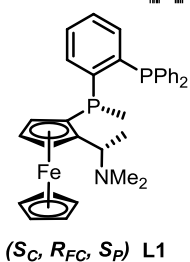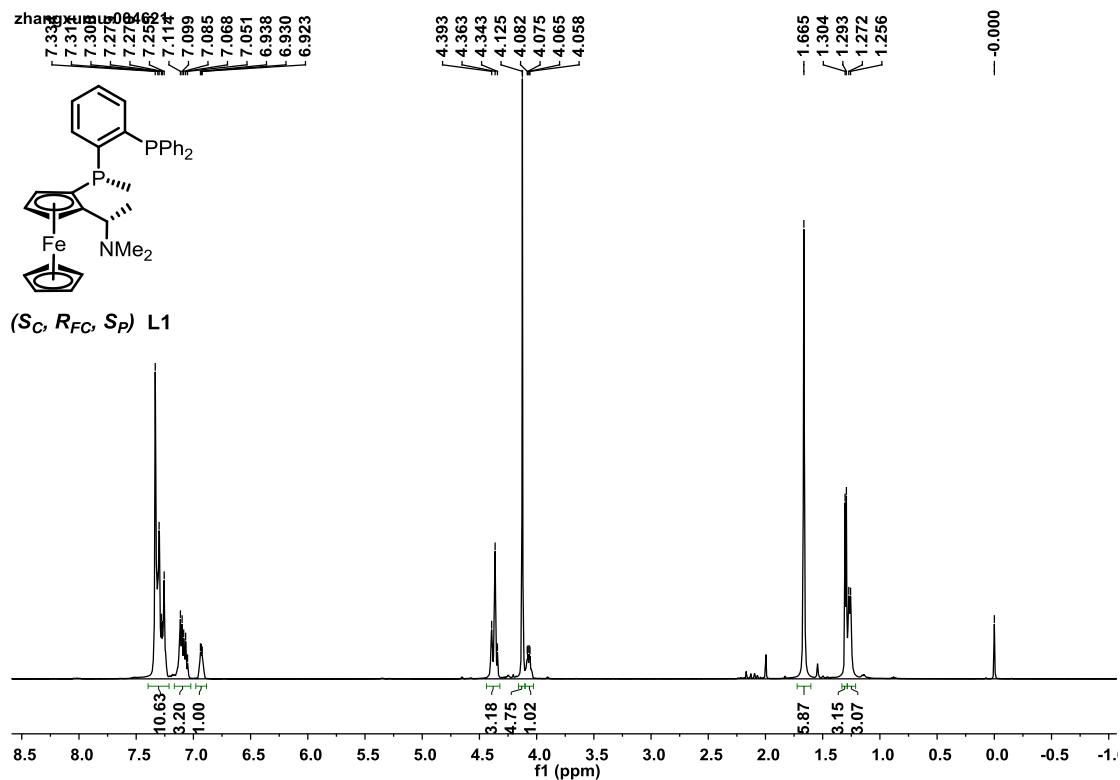

zhangxumu-004621

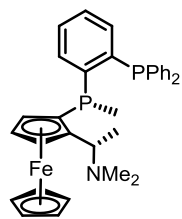

(*S<sub>C</sub>*, *R<sub>FC</sub>*, *S<sub>P</sub>*) L1

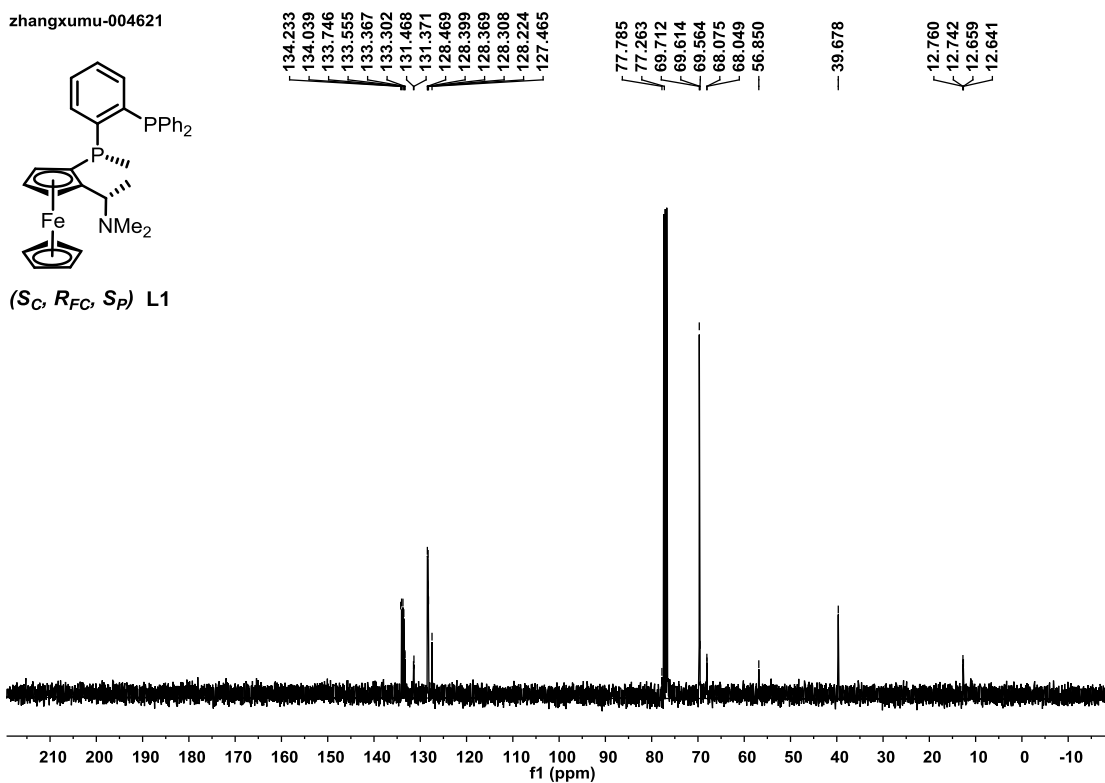

zhangxumu-004612

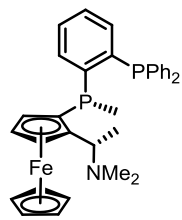

(*S<sub>C</sub>*, *R<sub>FC</sub>*, *S<sub>P</sub>*) L1

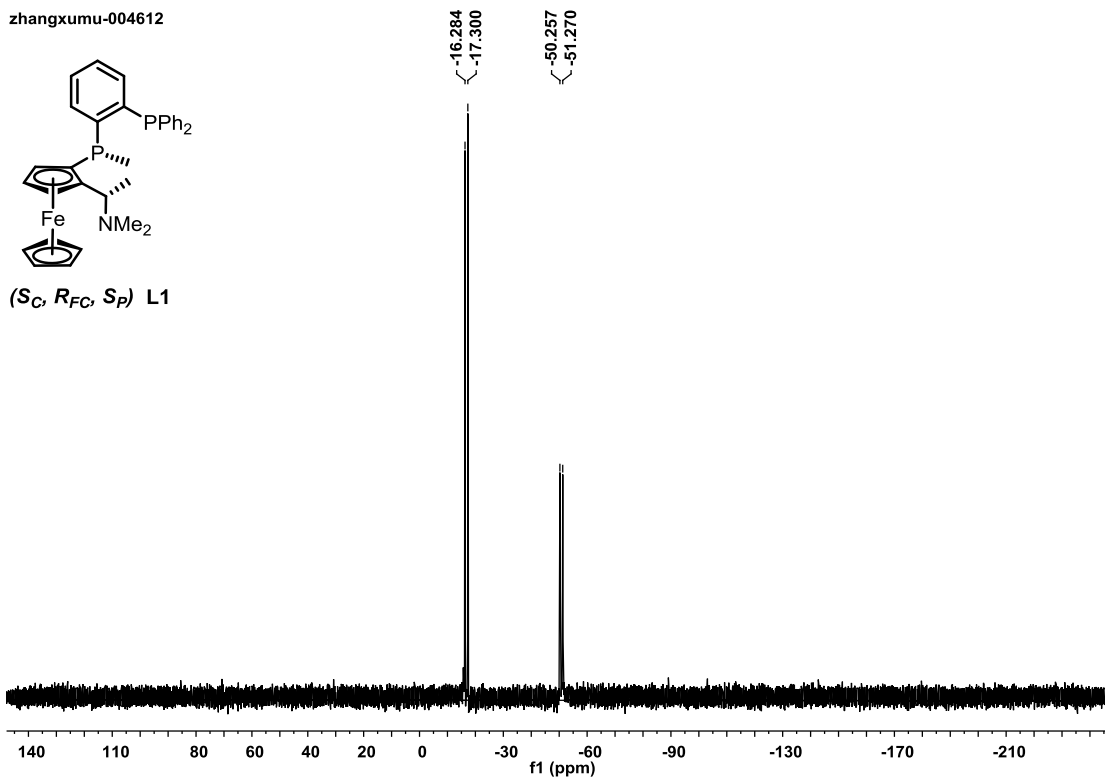

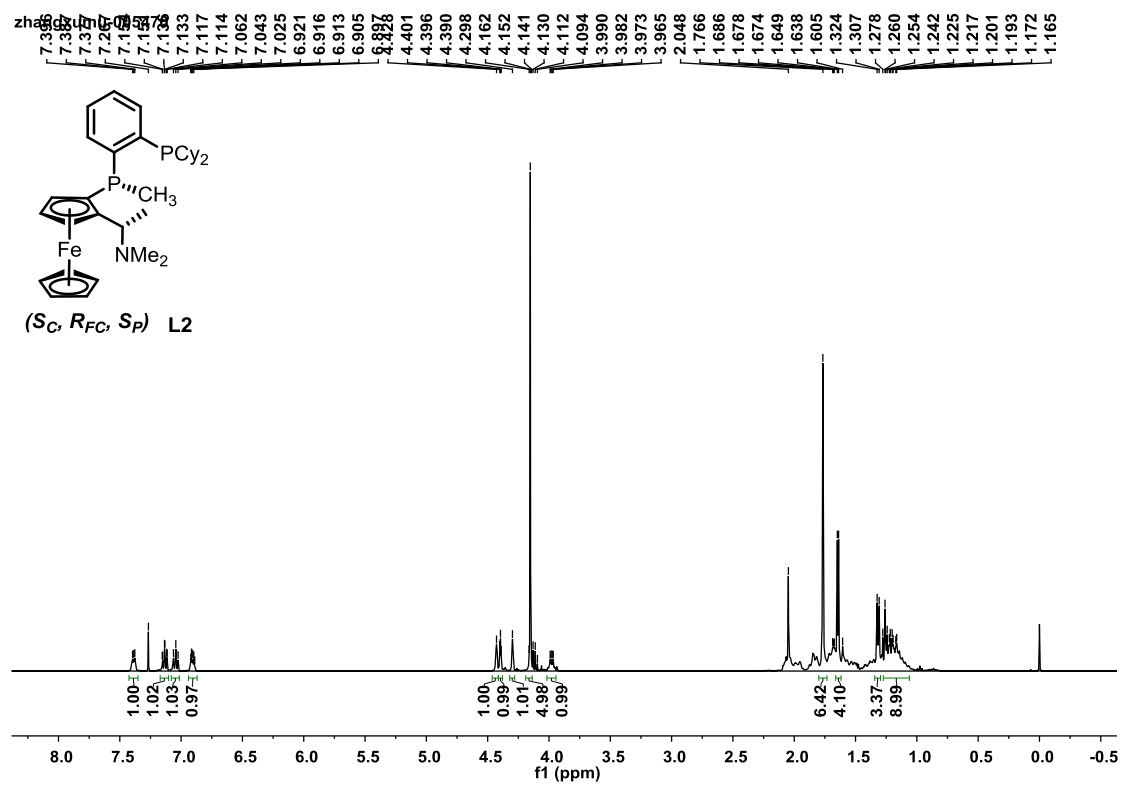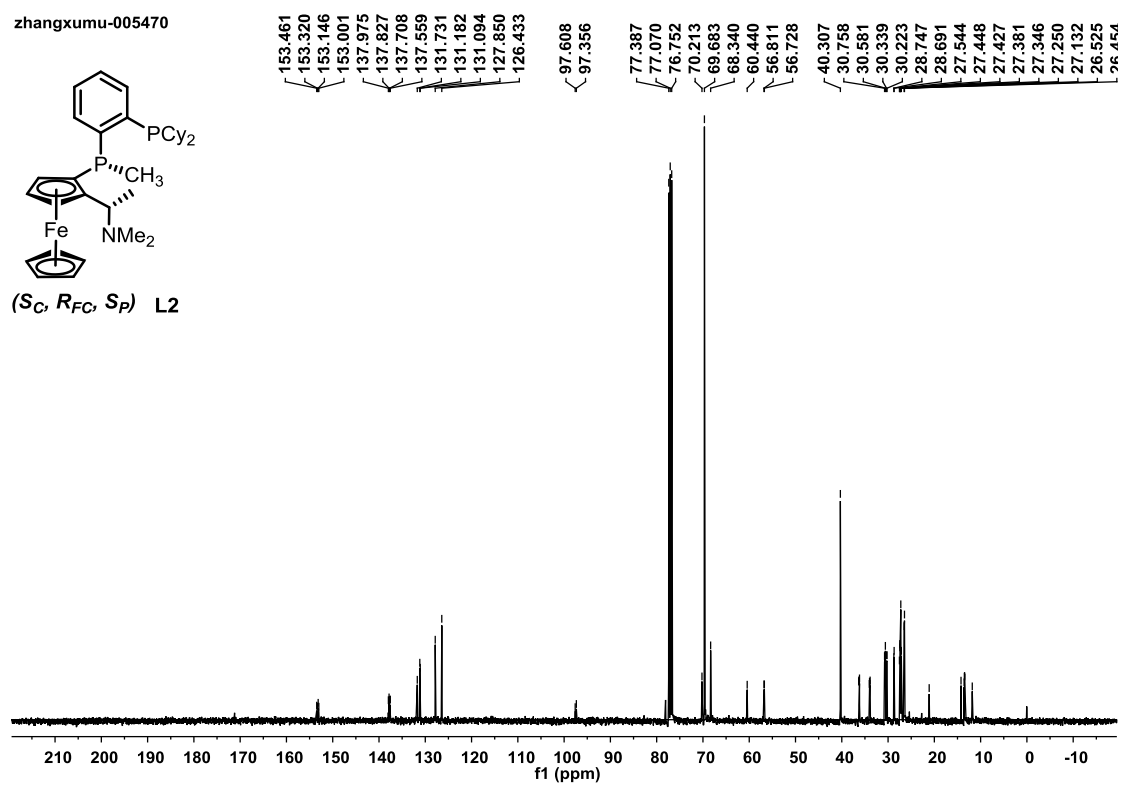

zhangxumu-005470

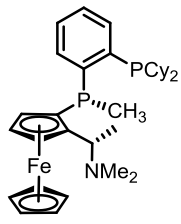

(S<sub>C</sub>, R<sub>FC</sub>, S<sub>P</sub>) L2

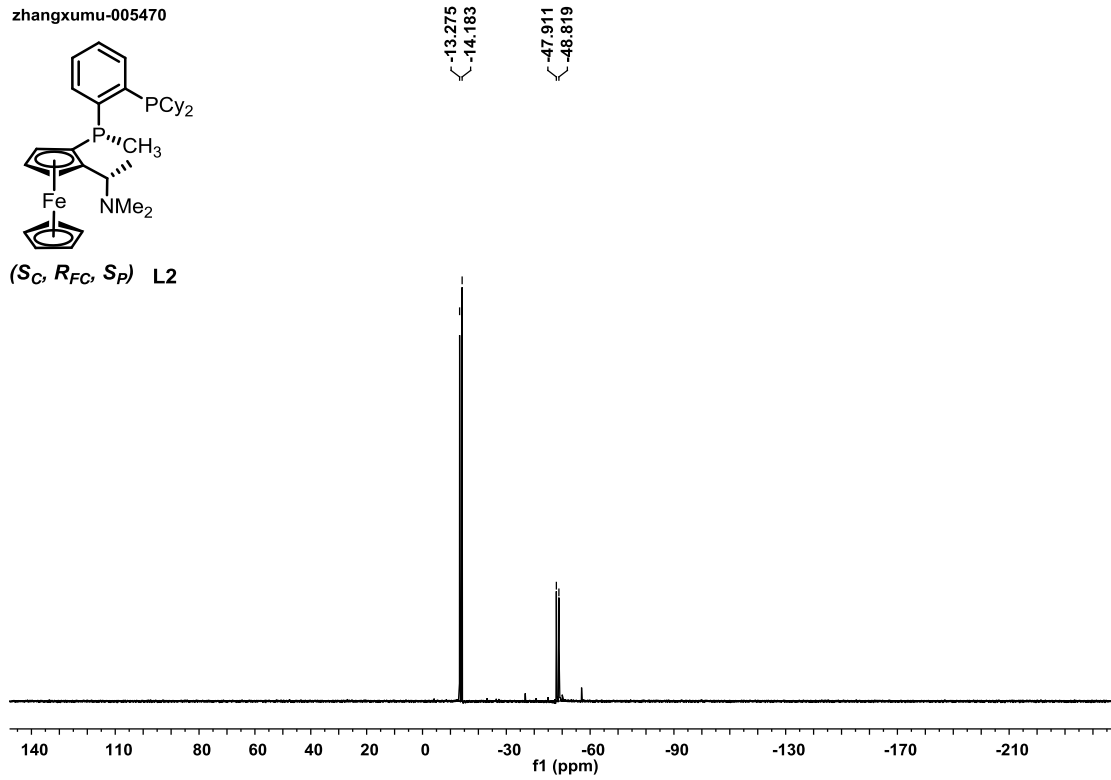

7.36  
7.34  
7.33  
7.31  
7.29  
7.28  
7.16

4.37  
4.36  
4.34  
4.34  
4.28  
4.27  
4.27  
4.25  
4.24  
4.23  
4.21  
4.21  
4.17  
4.17  
4.15  
4.14  
4.13  
4.09  
4.09  
4.07  
4.07  
4.06

1.68  
1.58  
1.57  
1.24  
1.22  
1.21  
1.20  
1.17

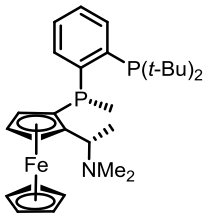

(S<sub>C</sub>, R<sub>FC</sub>, S<sub>P</sub>) L3

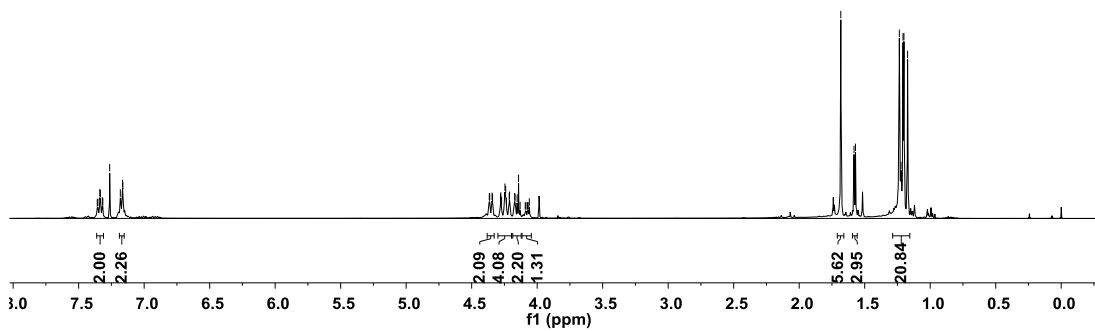

zhangxumu-004914

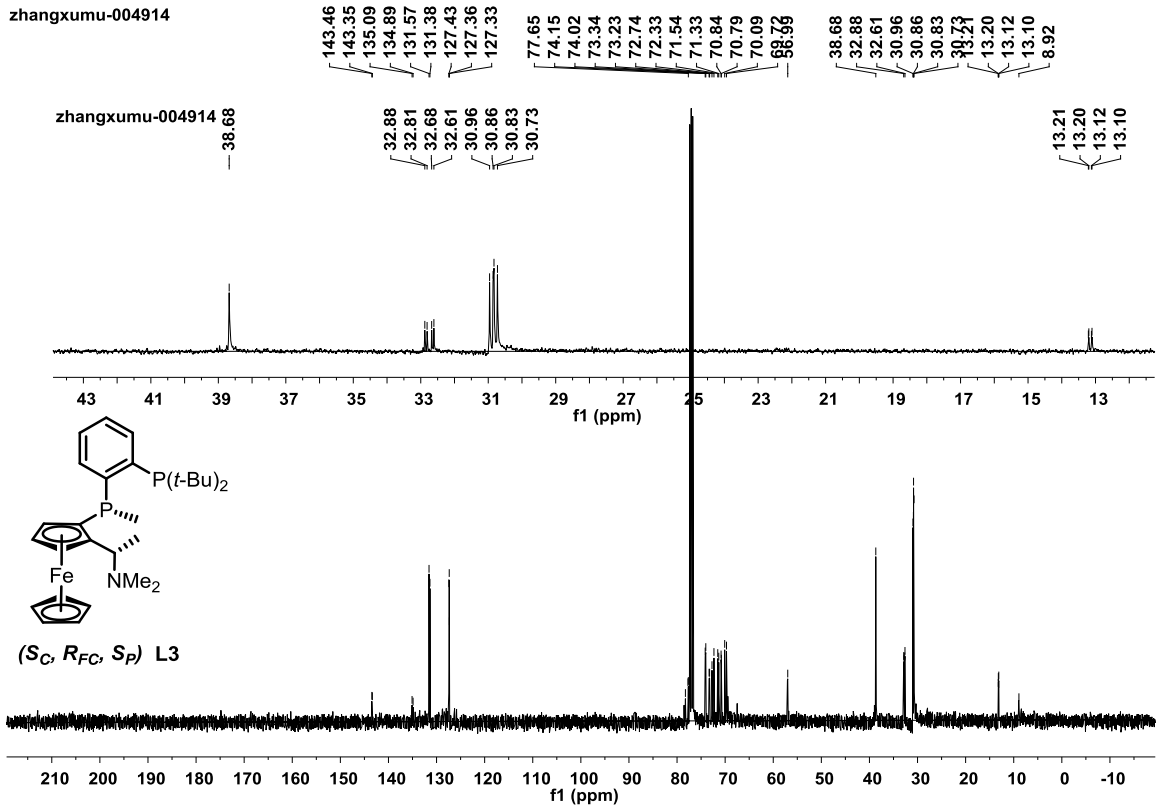

zhangxumu-004914

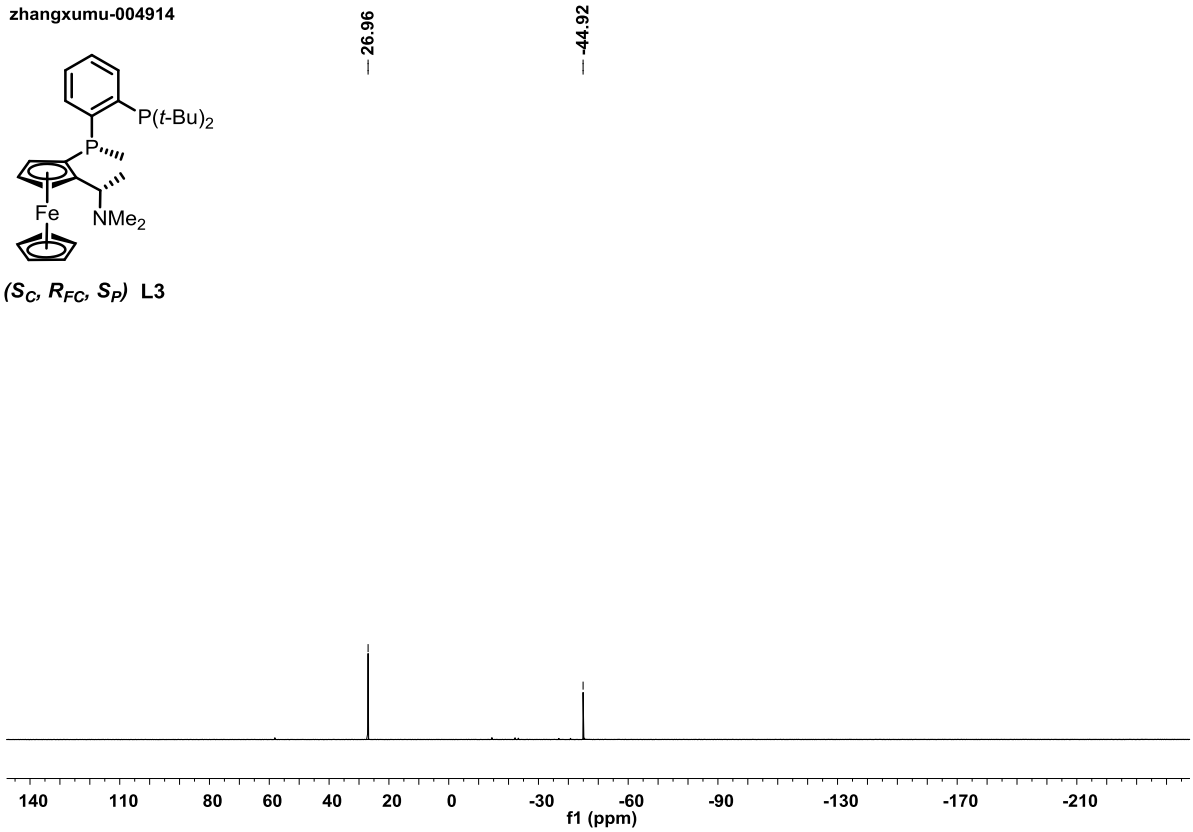

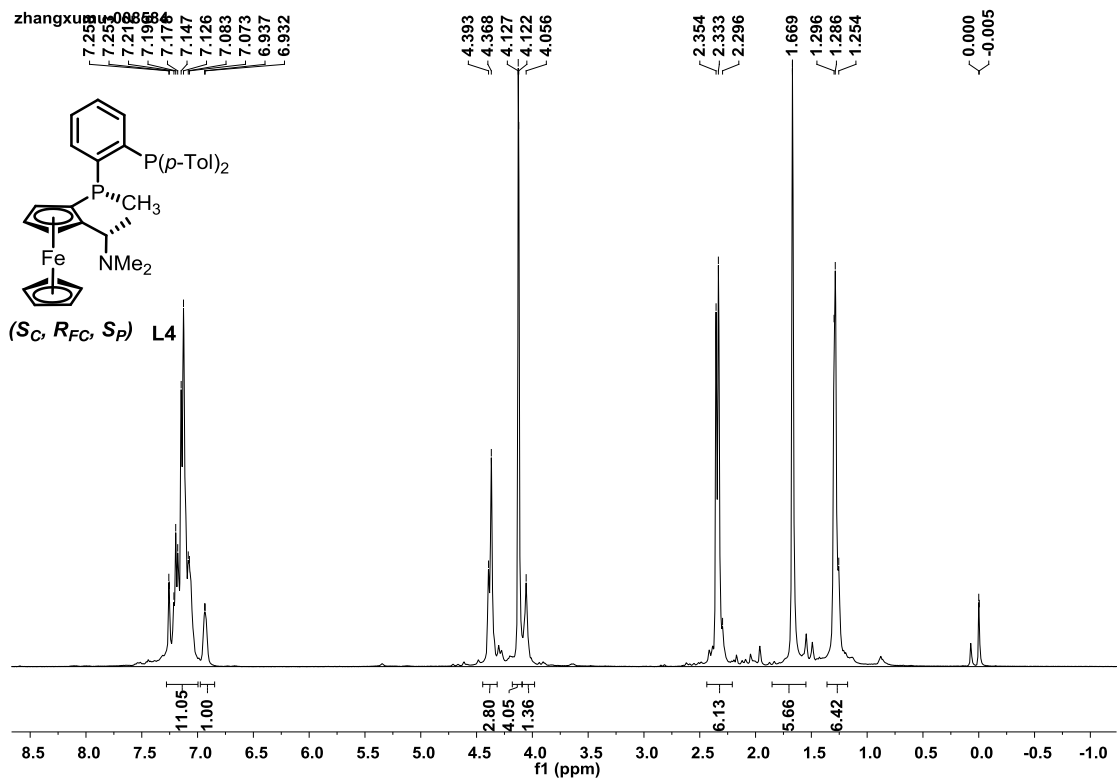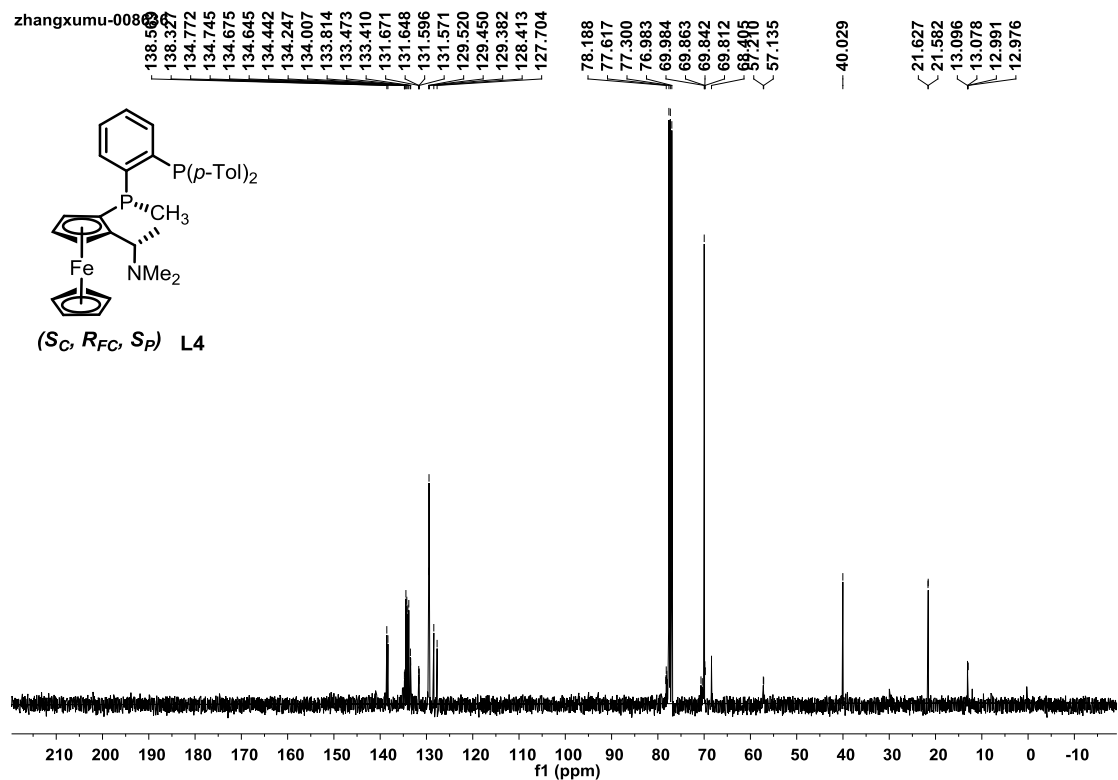

zhangxumu-005297

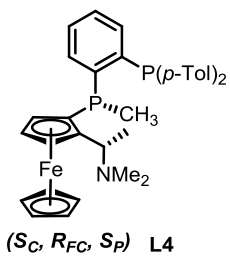

-18.000  
-19.020  
-51.128  
-52.146

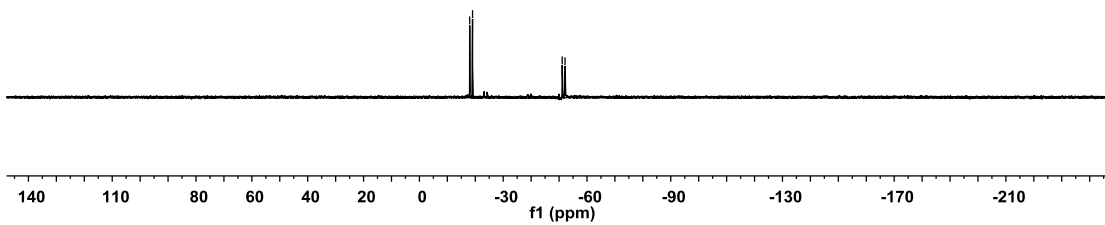

zhangxumu-001299

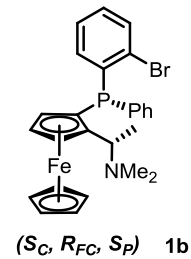

7.736  
7.734  
7.28  
7.26  
7.25  
7.23  
7.21  
7.19

4.45  
4.37  
4.09  
4.03

1.91  
1.36  
1.34  
1.29  
0.03

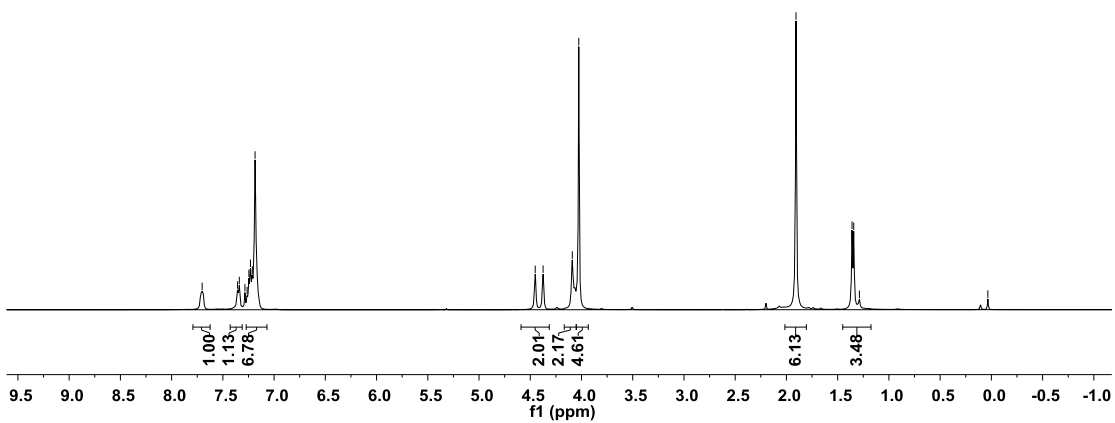

zhangxumu-001251

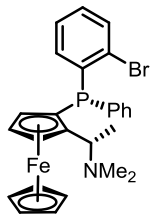

(*S<sub>C</sub>*, *R<sub>FC</sub>*, *S<sub>P</sub>*) 1b

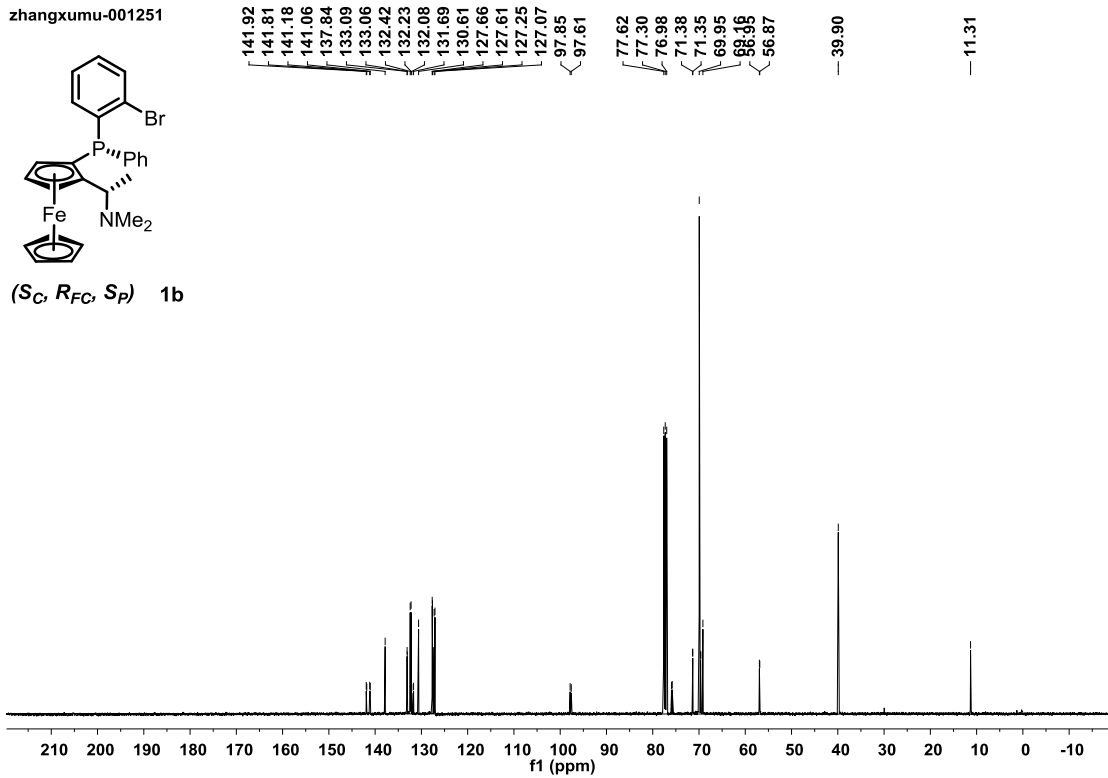

zhangxumu-001251

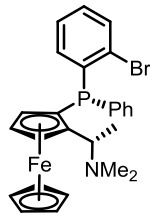

(*S<sub>C</sub>*, *R<sub>FC</sub>*, *S<sub>P</sub>*) 1b

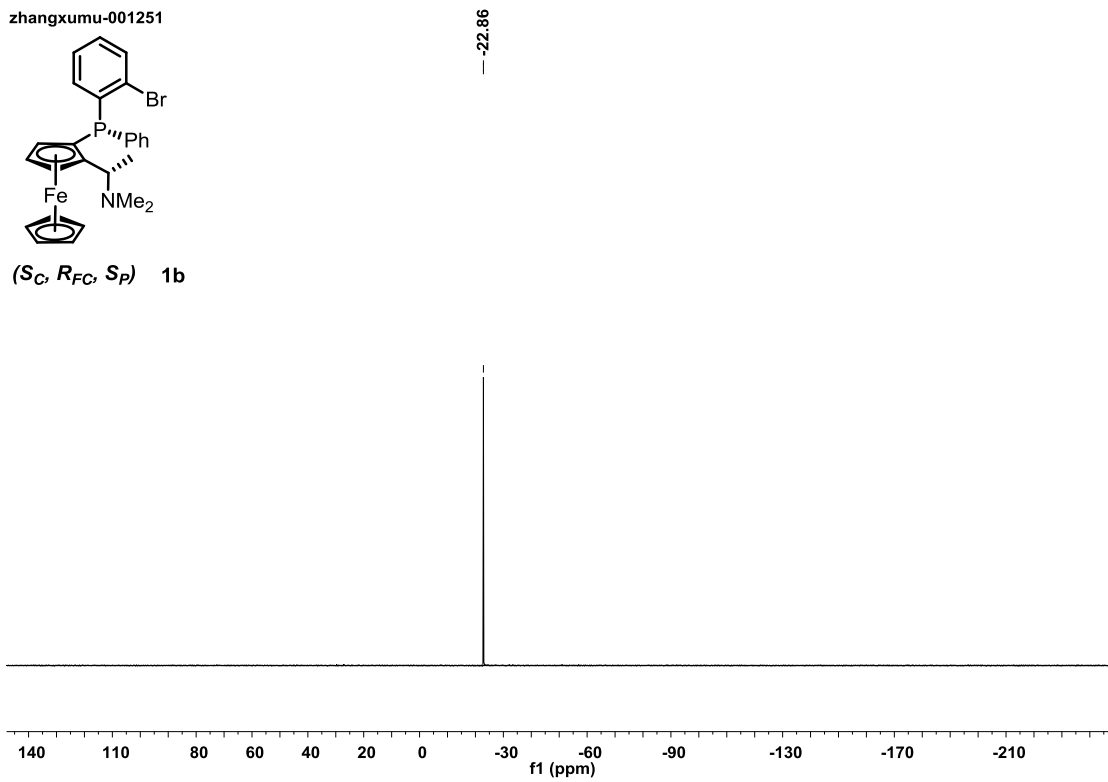



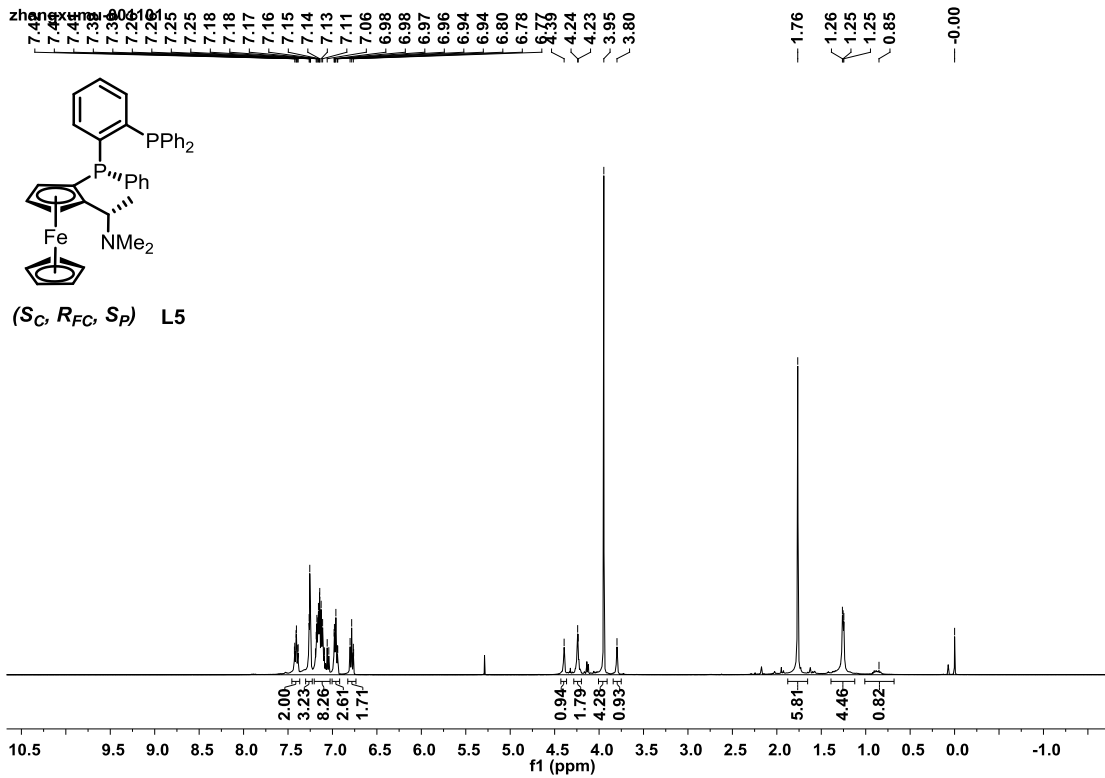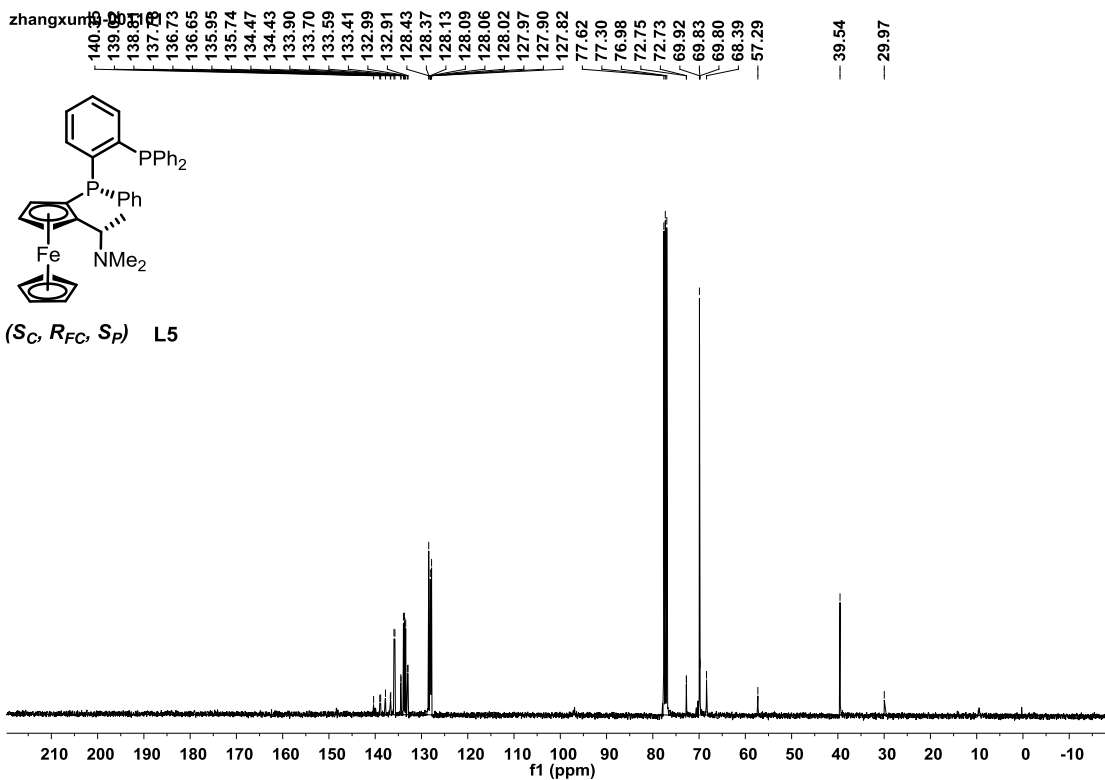

zhangxumu-001101

-16.56  
-17.60  
-29.84  
-30.86

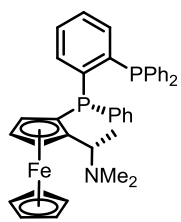

(*S<sub>C</sub>*, *R<sub>FC</sub>*, *S<sub>P</sub>*) L5

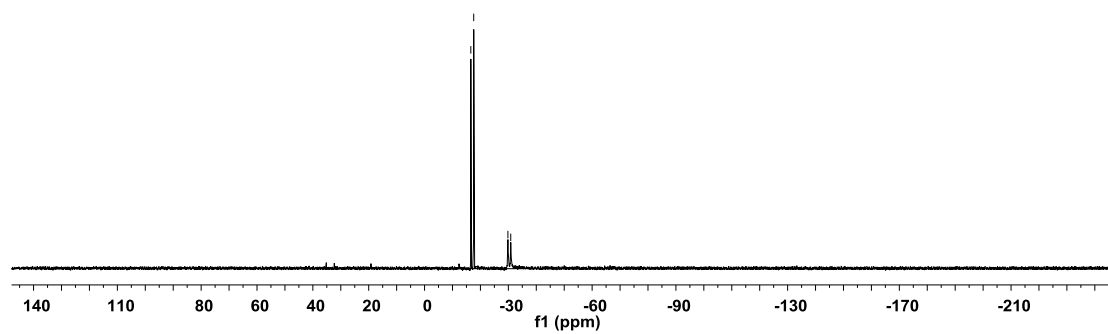

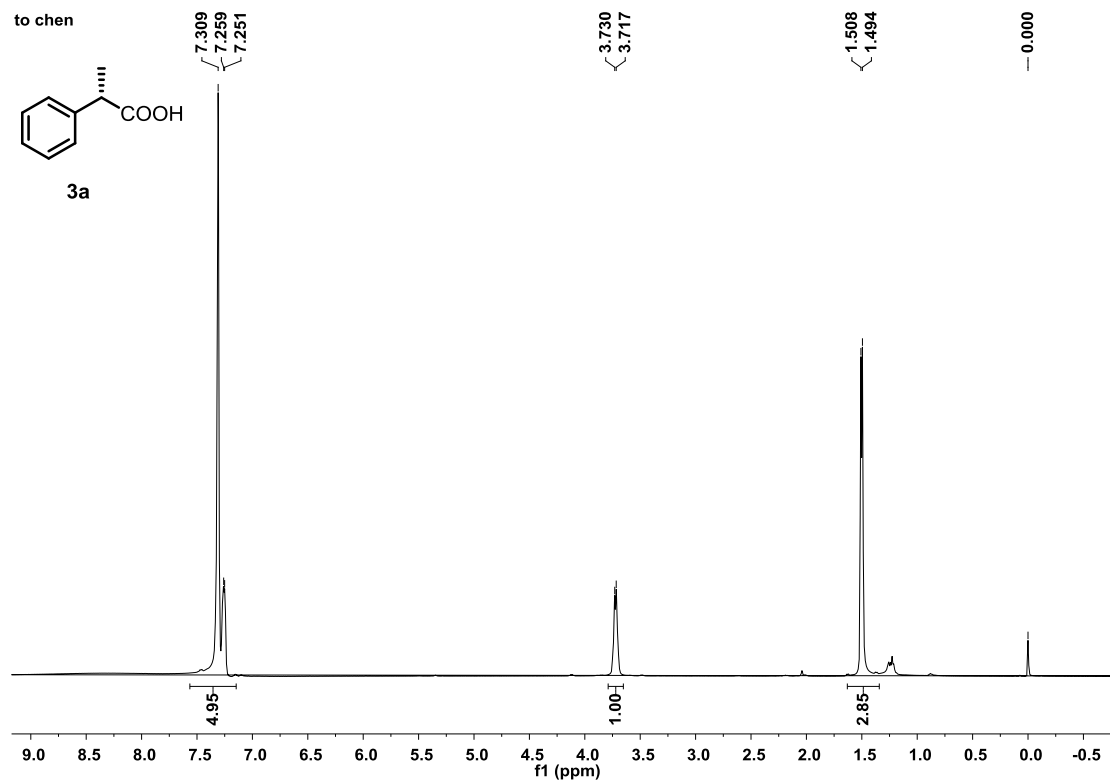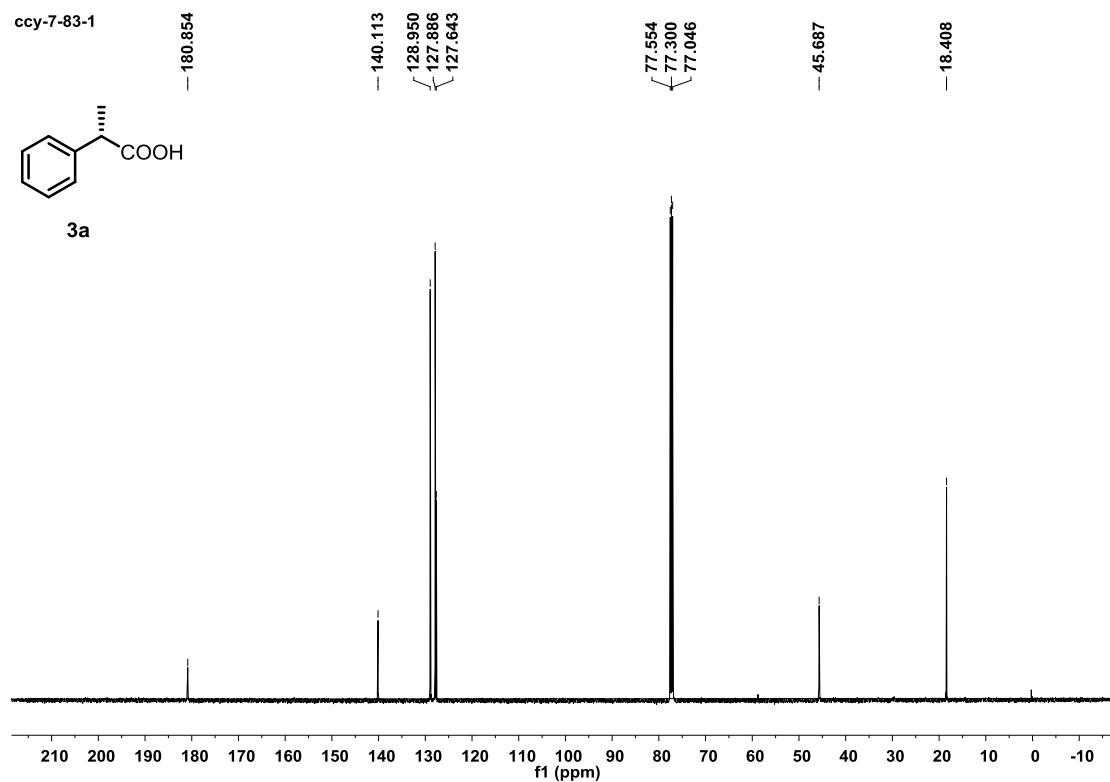

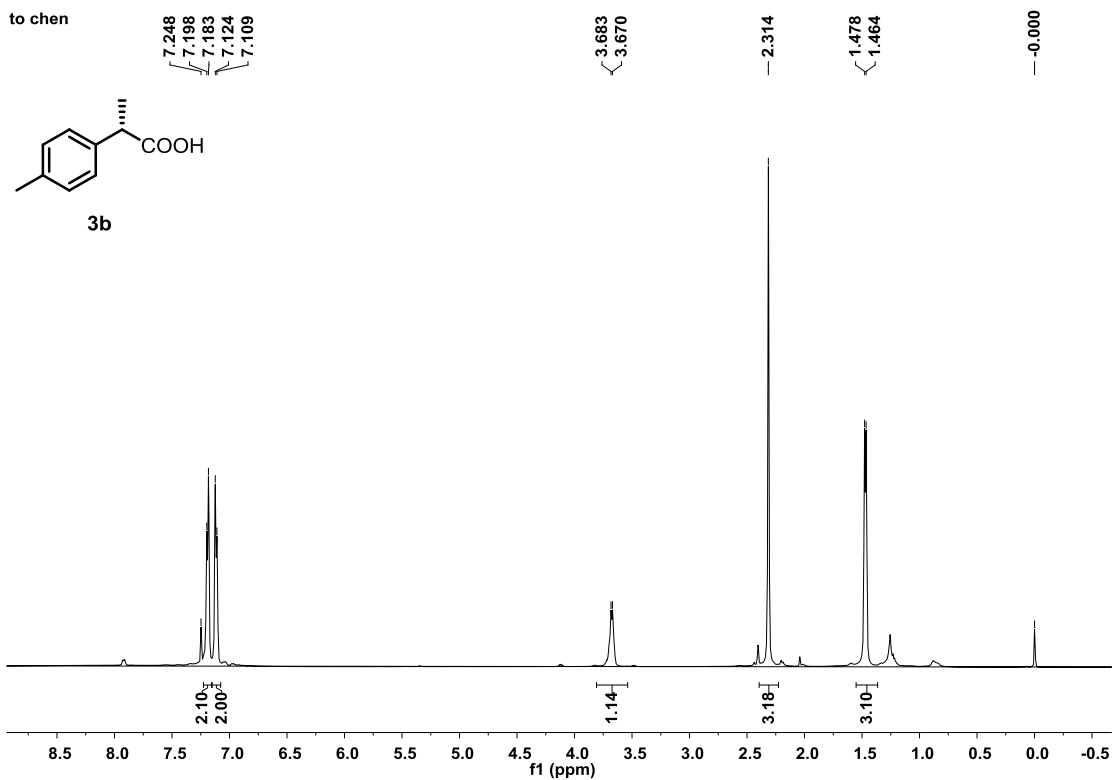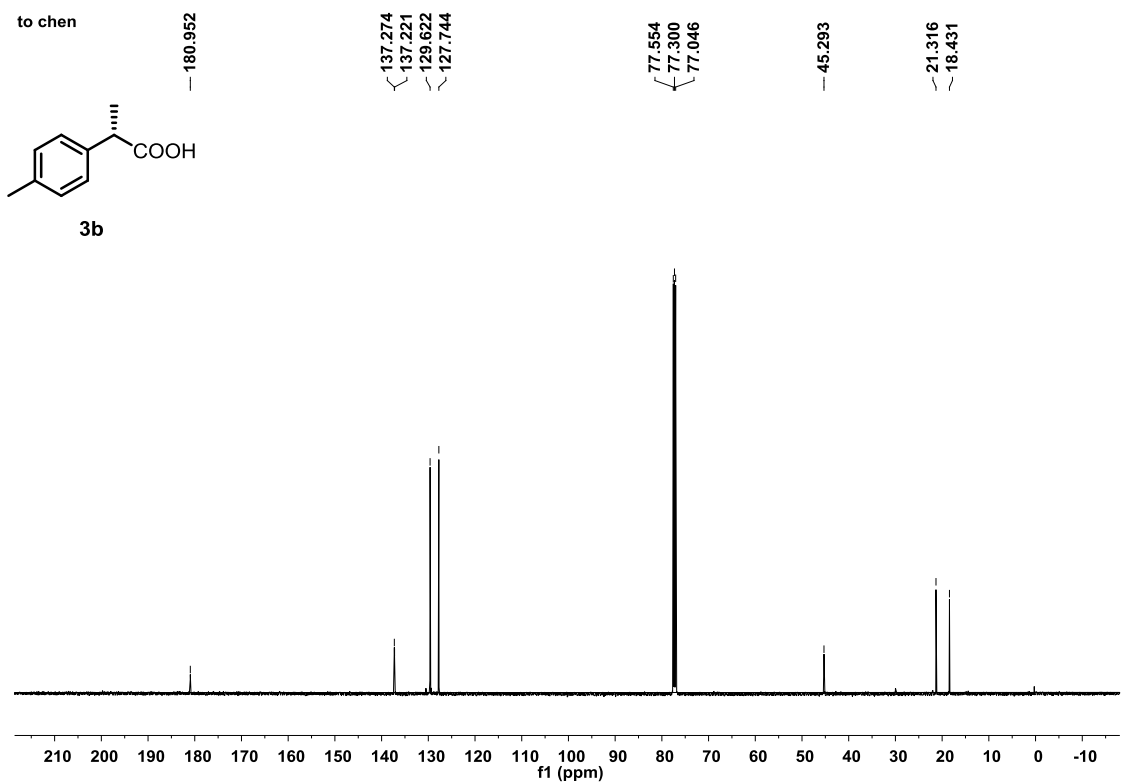

to chen

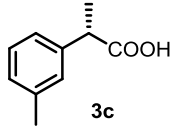

7.198  
7.183  
7.110  
7.094  
7.072  
7.057

3.685  
3.672

2.326

1.486  
1.473

-0.000

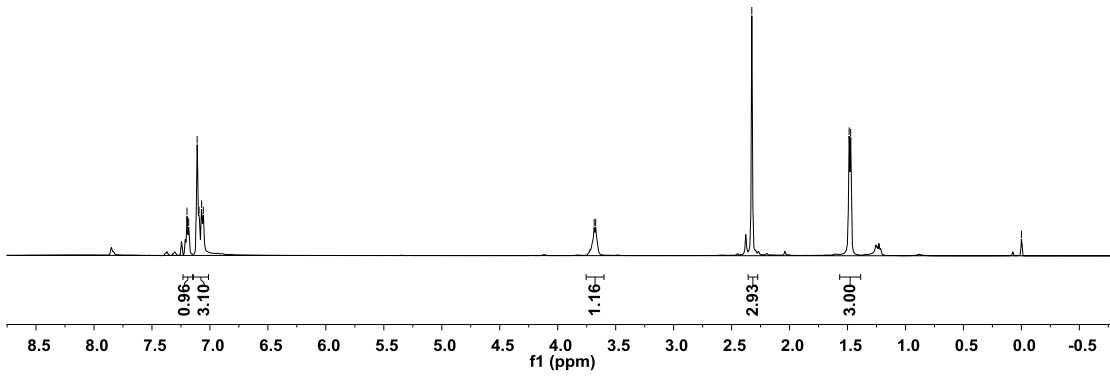

to chen

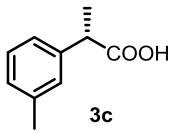

180.927

140.120  
138.595  
128.836  
128.607  
128.389  
124.895

77.554  
77.300  
77.046

45.663

21.675  
18.422

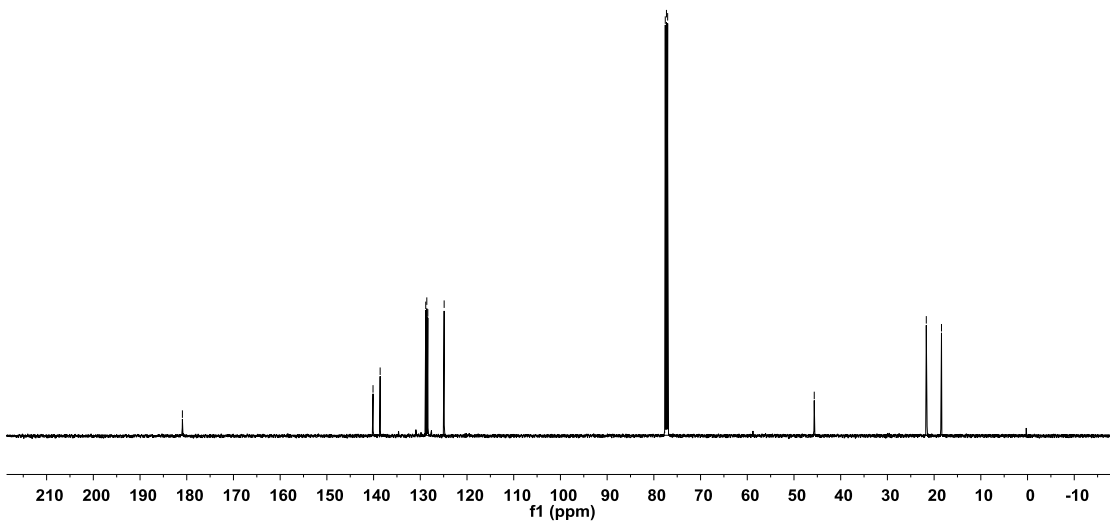

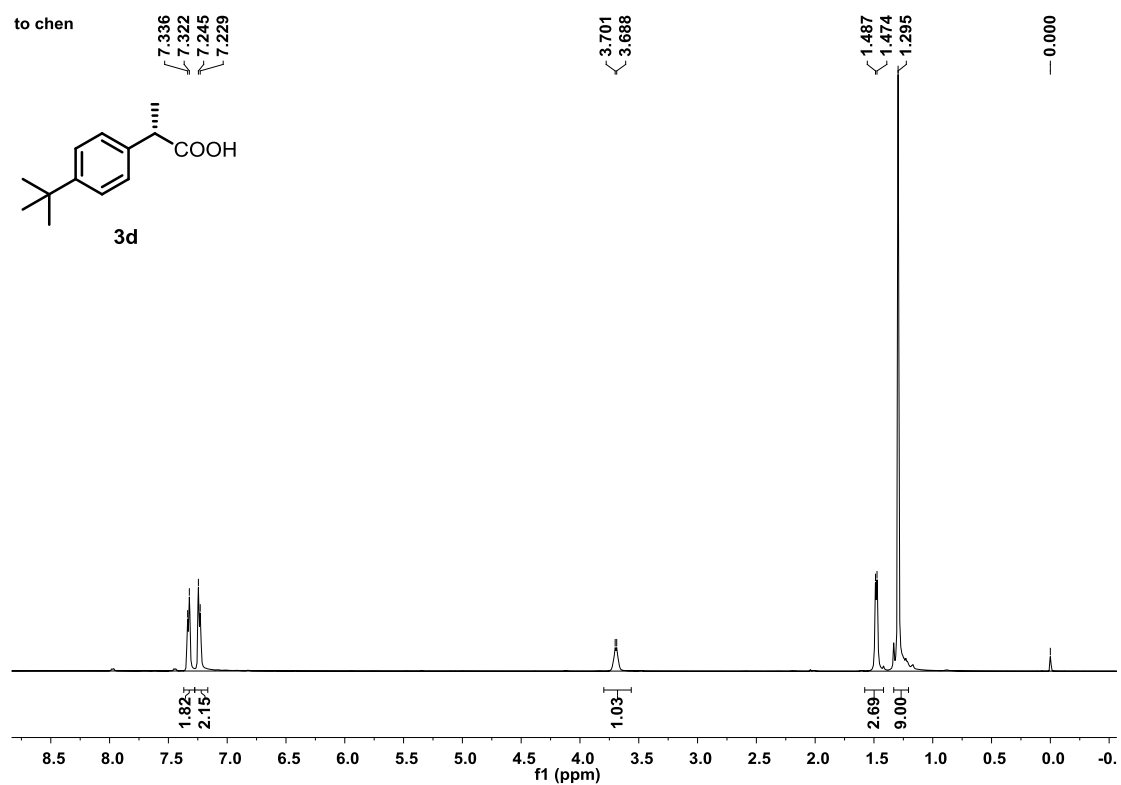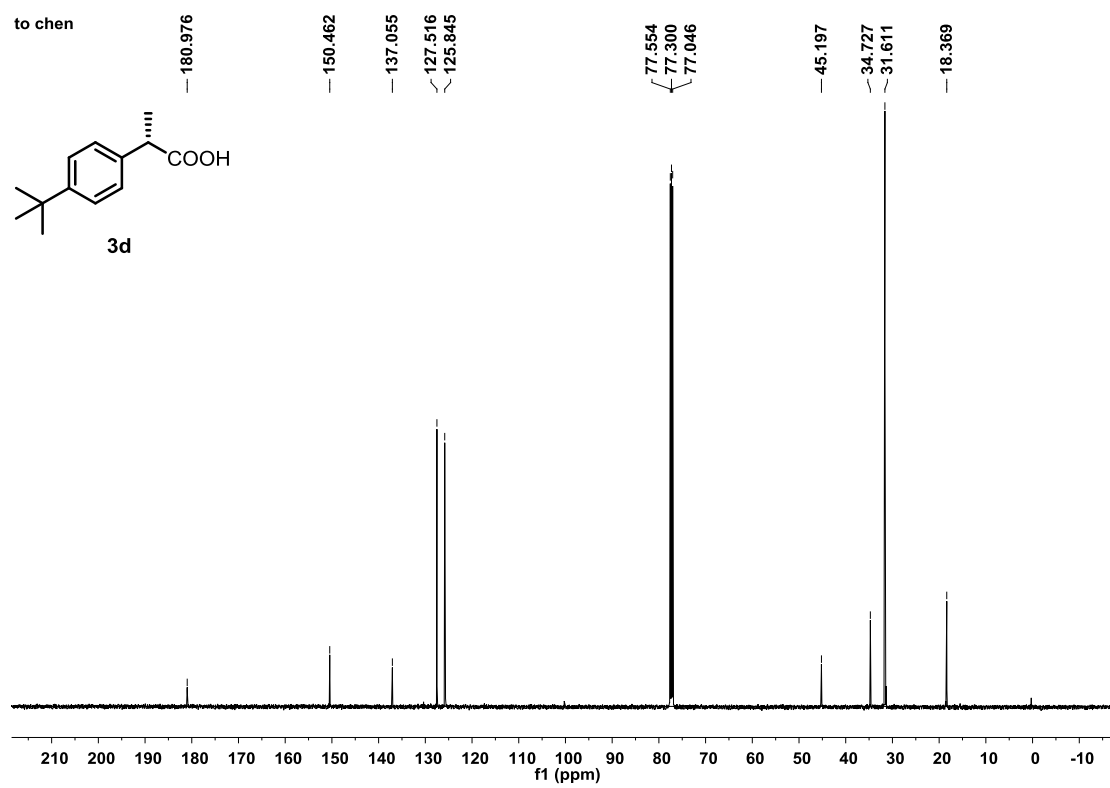

to chen

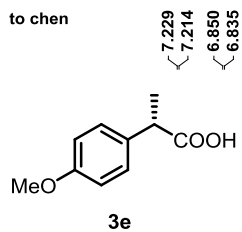

7.229  
7.214  
6.850  
6.835

3.774  
3.683  
3.667  
3.653

1.470  
1.456

0.000

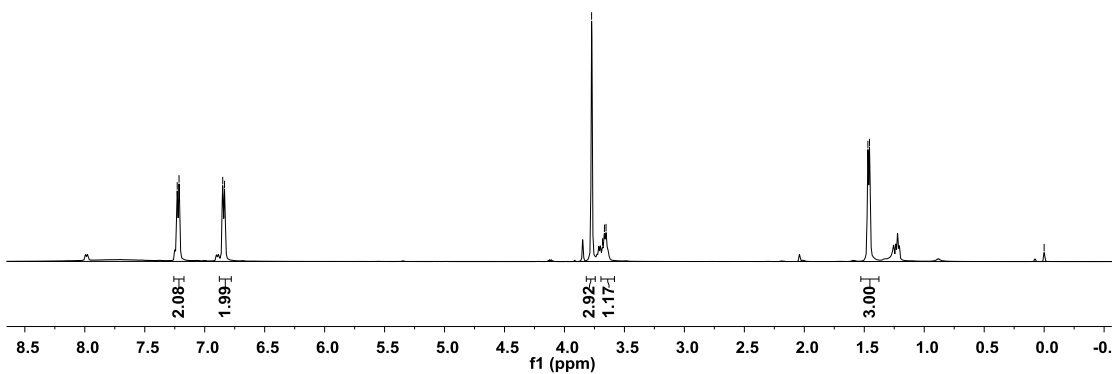

to chen

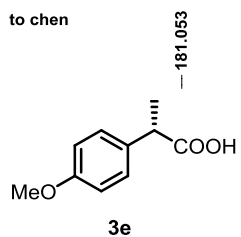

181.053

159.076

132.355

128.881

114.310

77.554

77.300

77.046

55.520

44.879

18.479

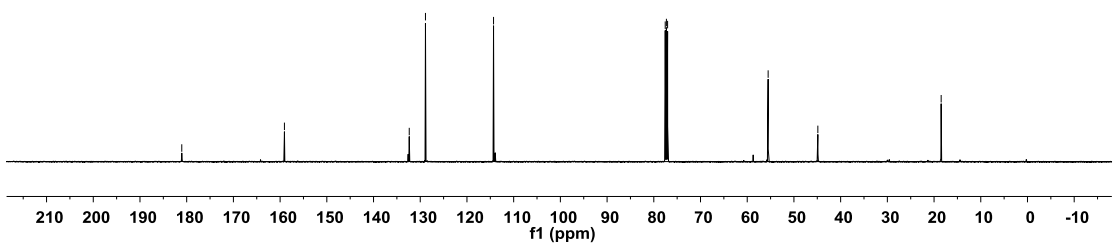

to chen

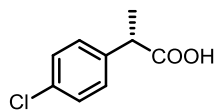

3f

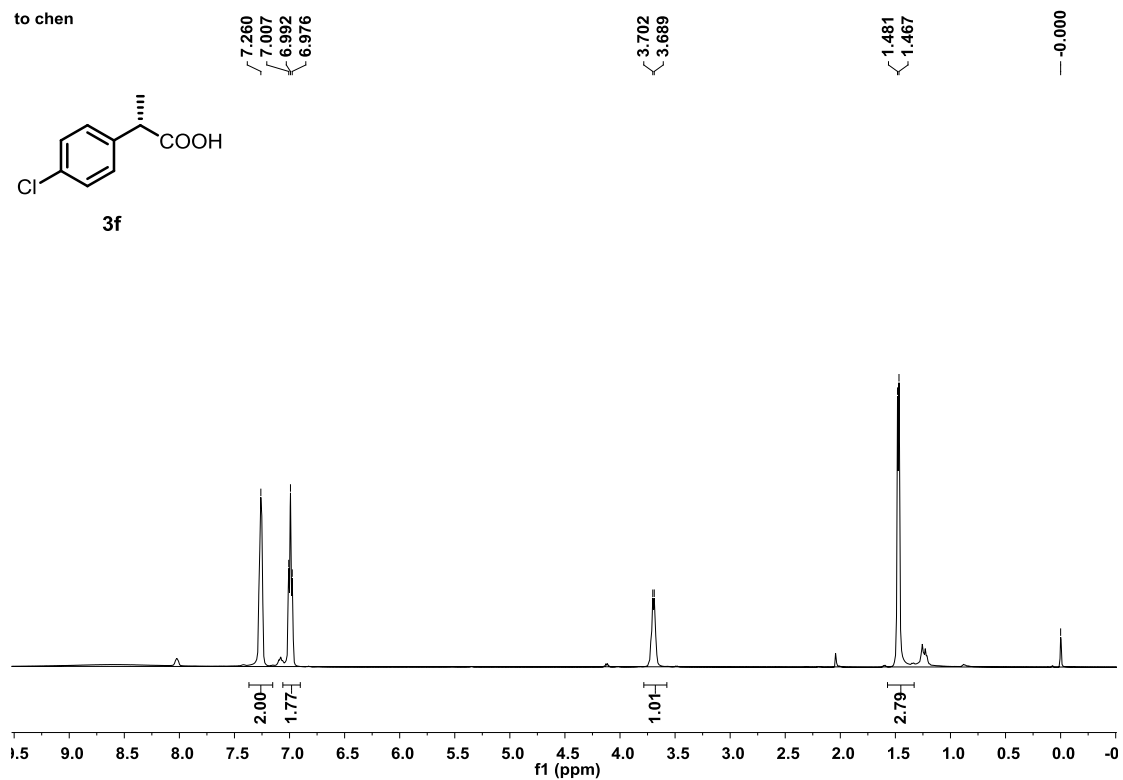

to chen

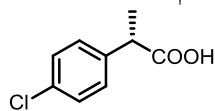

3f

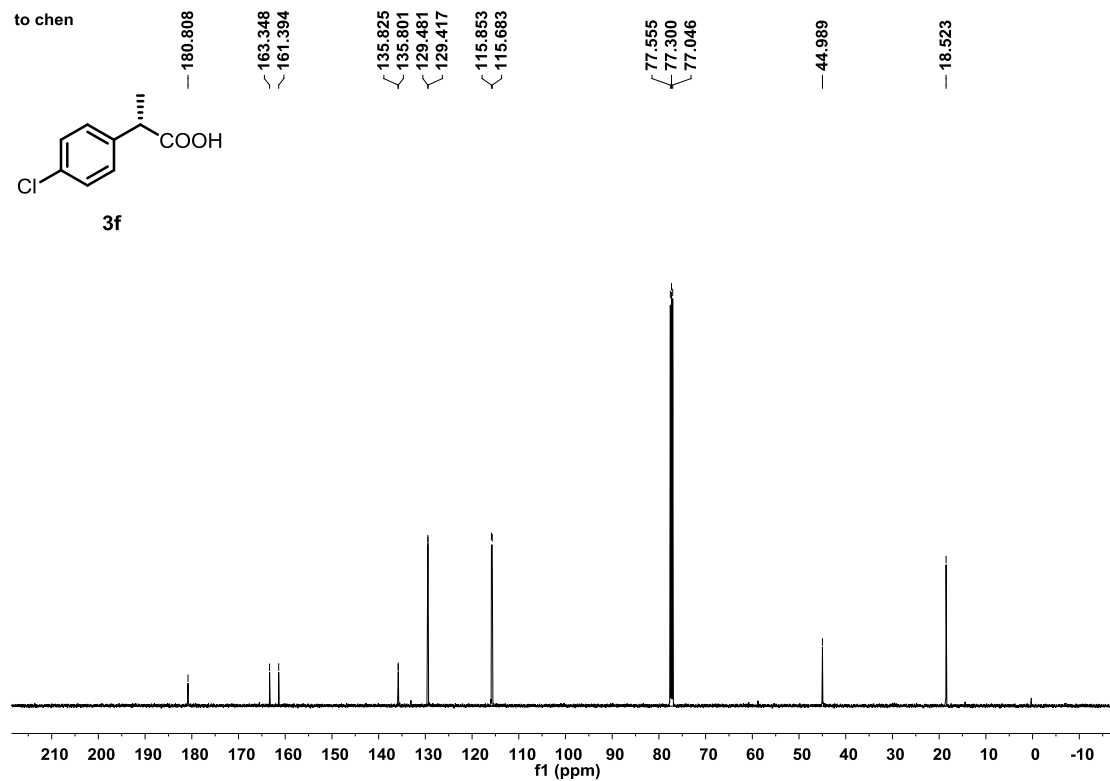



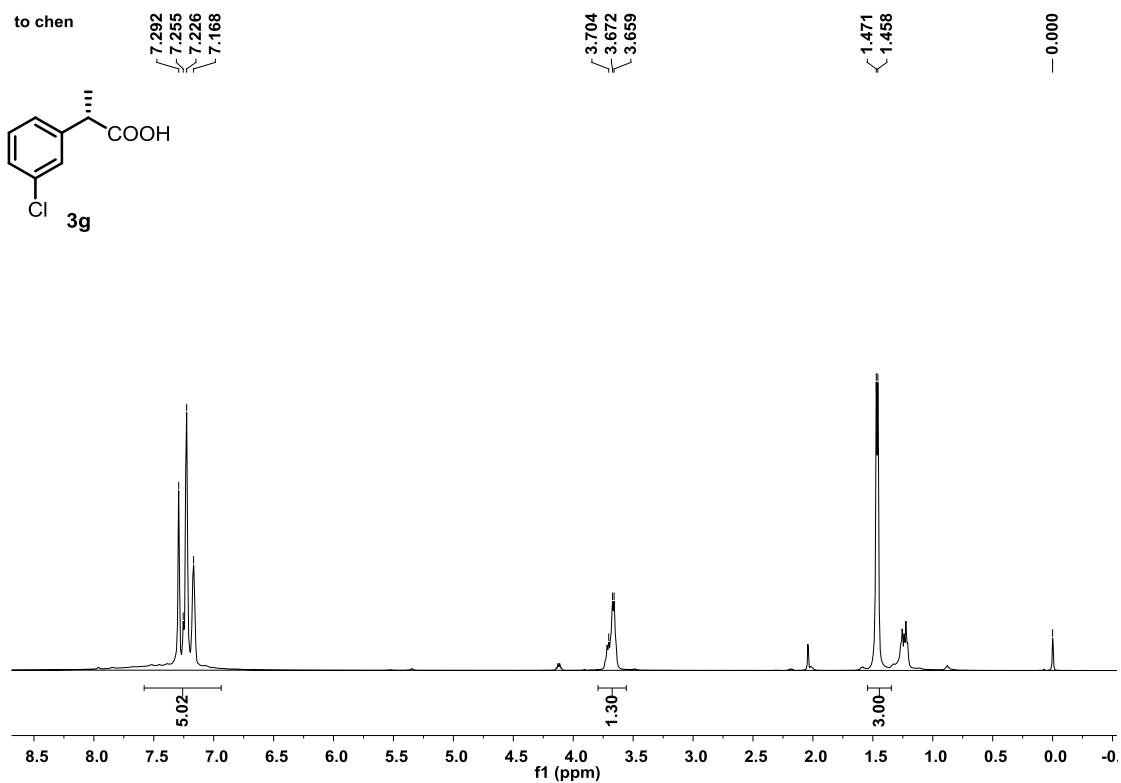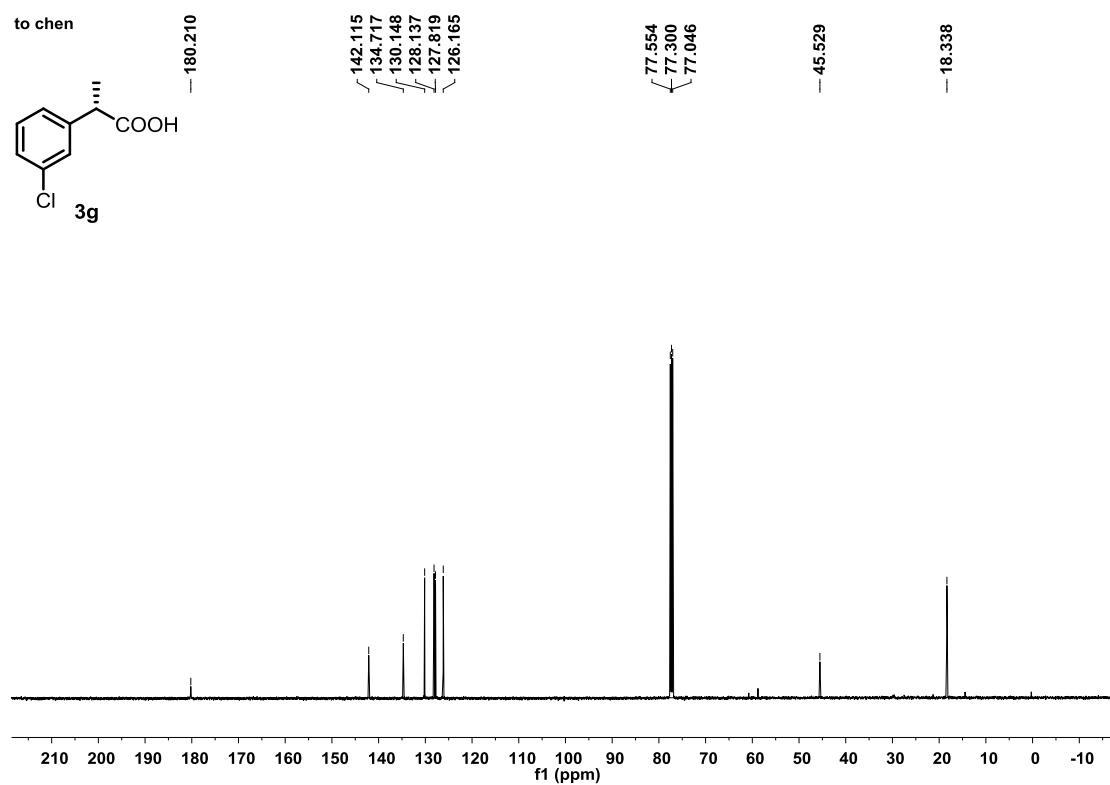

to chen

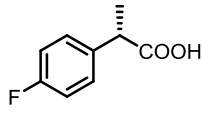

3h

7.259  
7.005  
6.989  
6.973

3.715  
3.701  
3.687

1.478  
1.465

-0.000

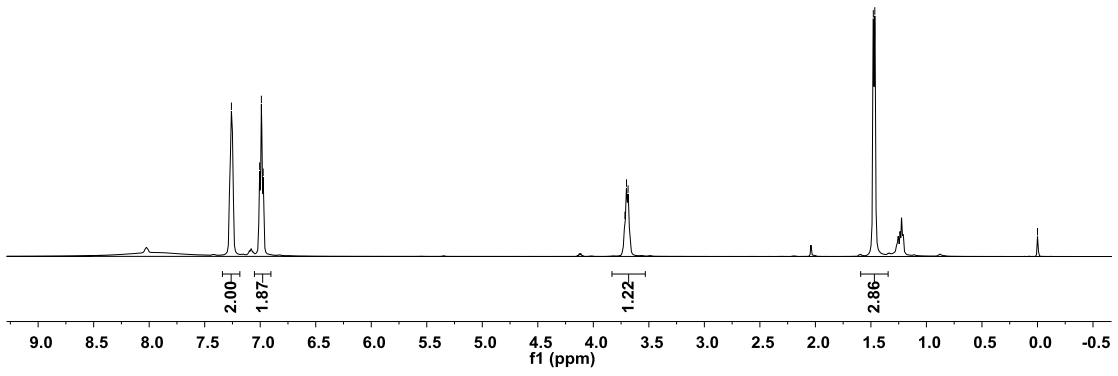

to chen

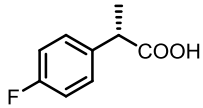

3h

180.753

163.337  
161.383

135.862  
135.838  
129.474  
129.410

115.838  
115.668

77.554  
77.300  
77.046

45.002

18.521

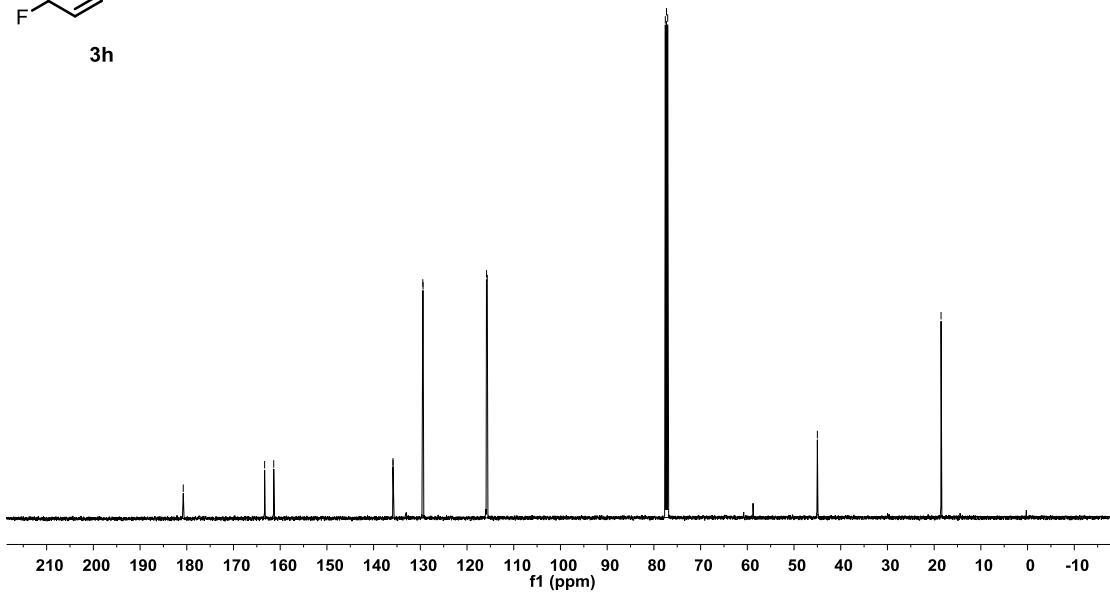

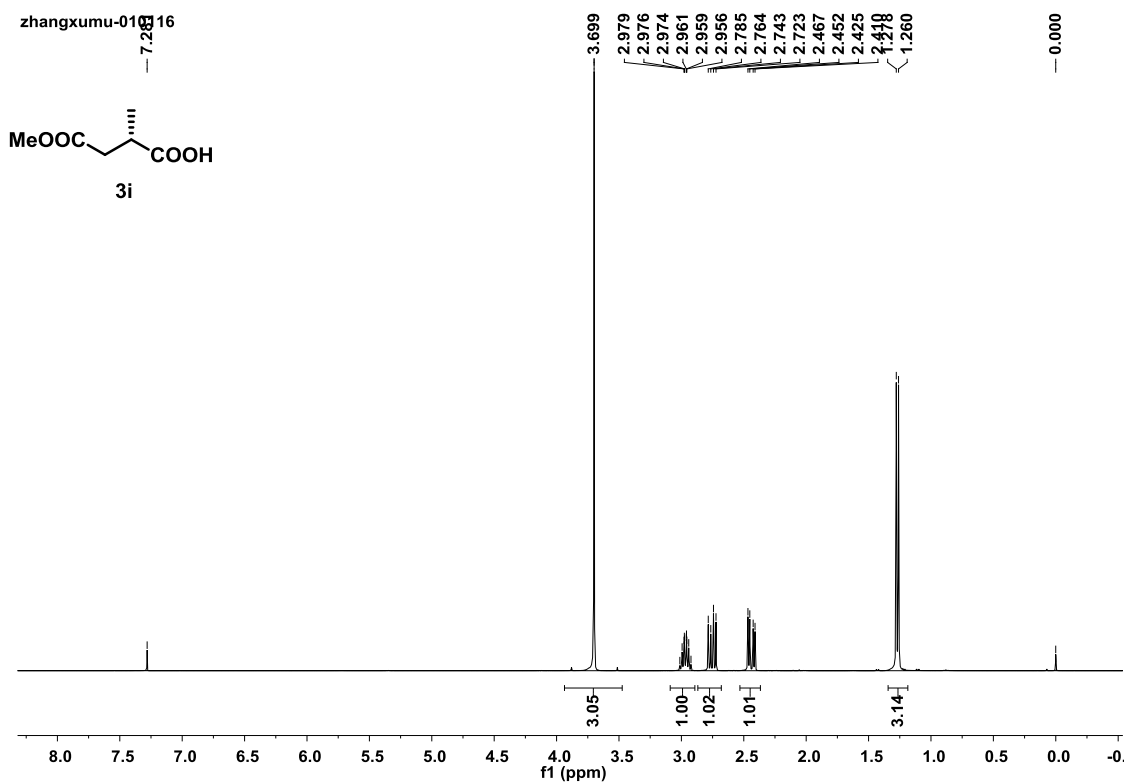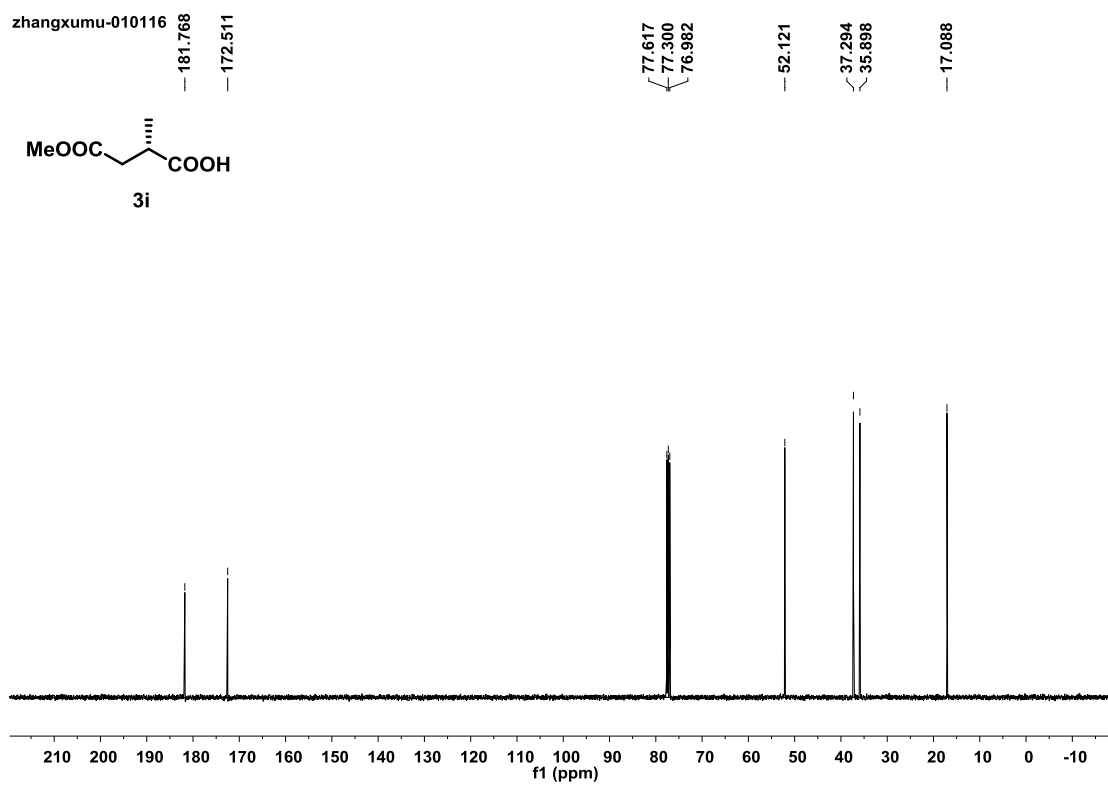

to chen  
7.333  
7.320  
7.306  
7.262  
7.248  
7.226  
7.212

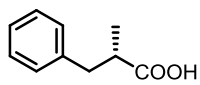

3j

3.139  
3.128  
3.113  
3.101  
2.819  
2.806  
2.793  
2.781  
2.722  
2.697  
2.679  
2.084

1.215  
1.202

0.045

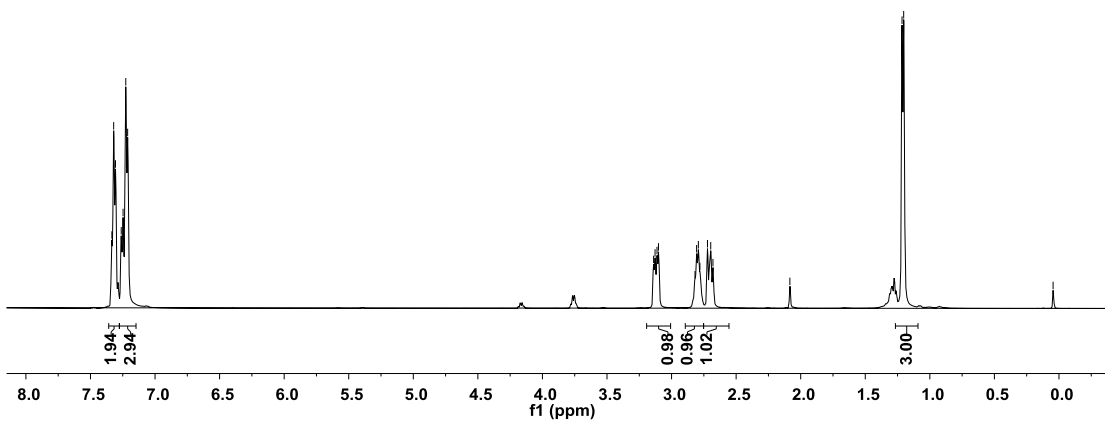

to chen

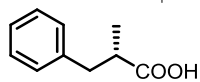

3j

182.729

139.382

129.286

128.687

126.676

77.554

77.300

77.046

41.610

39.608

16.753

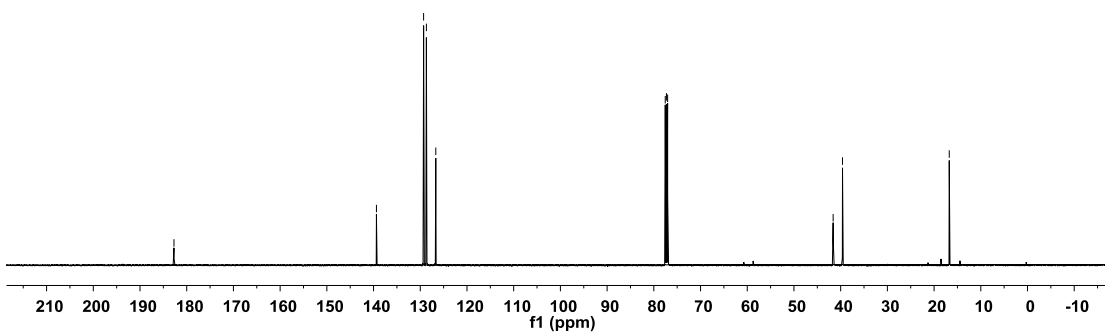

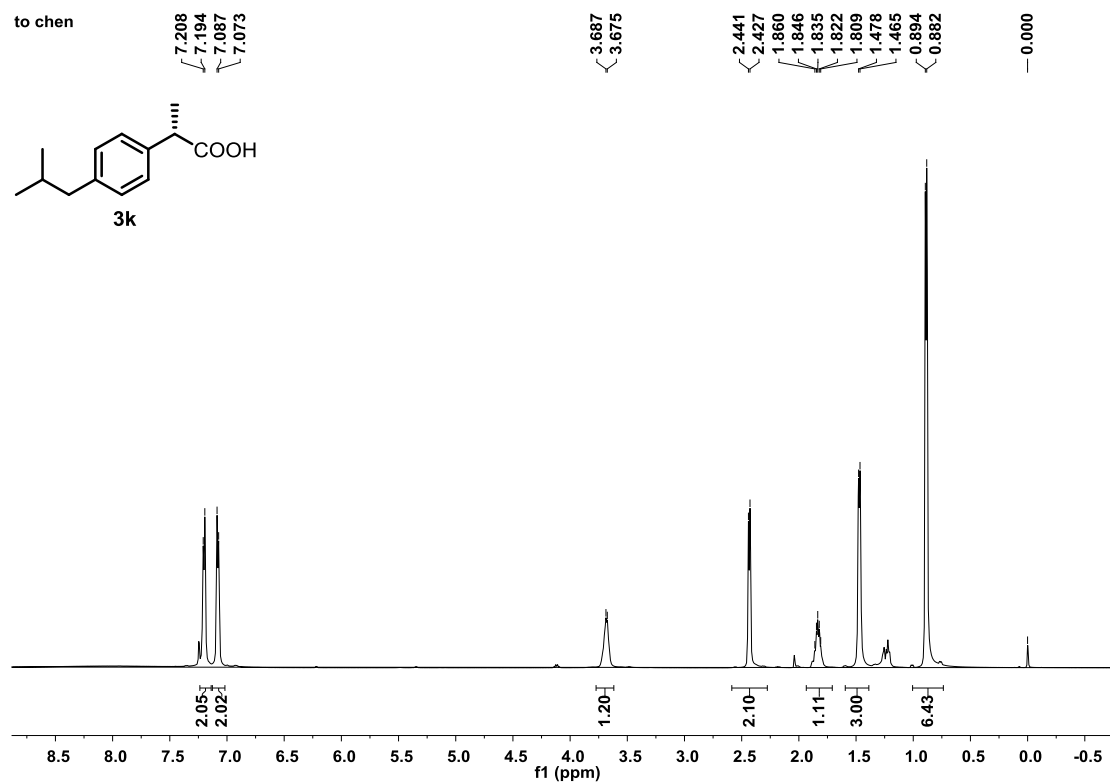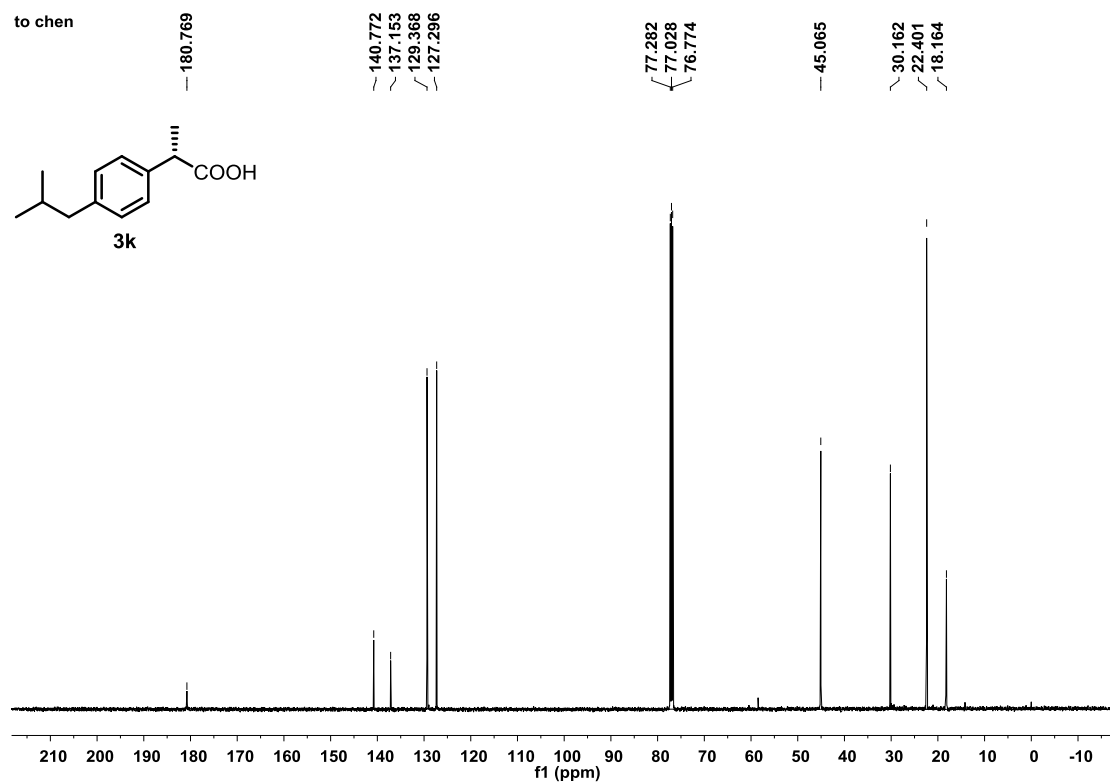

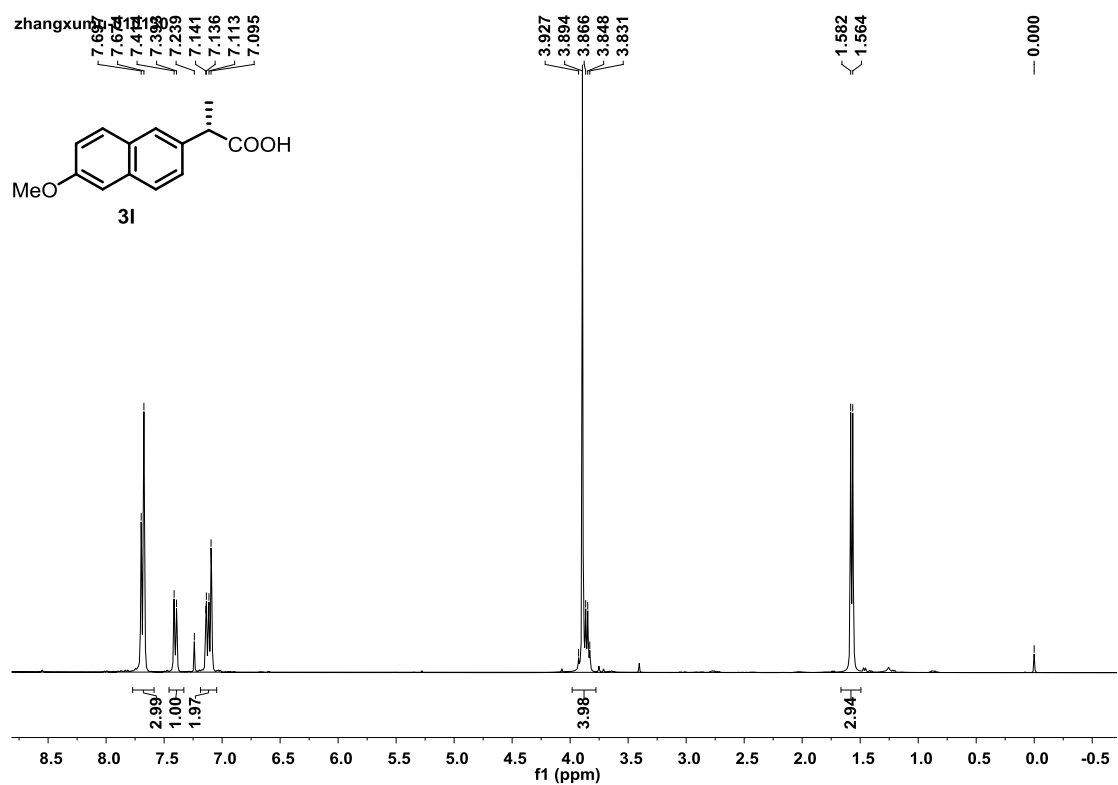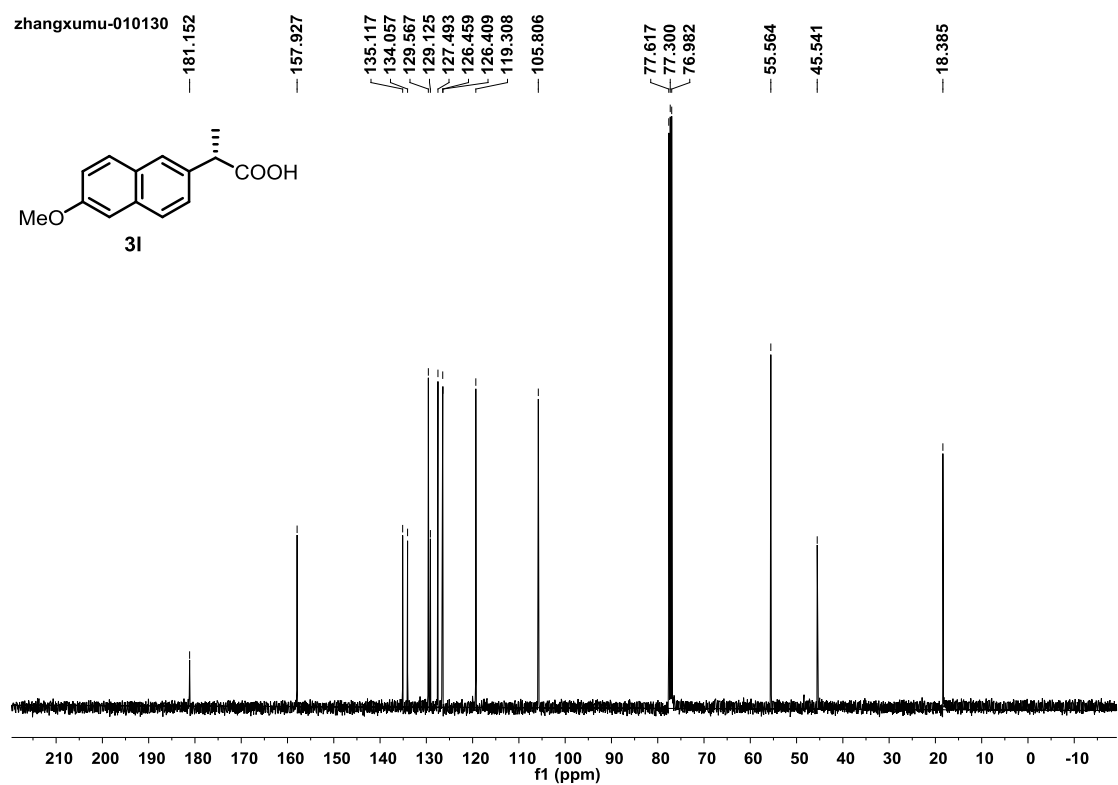

to chen

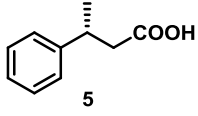

7.302  
7.287  
7.273  
7.215  
7.201

3.279  
3.265  
3.251  
3.238  
2.674  
2.662  
2.643  
2.631  
2.578  
2.562  
2.548  
2.531  
1.313  
1.300

-0.000

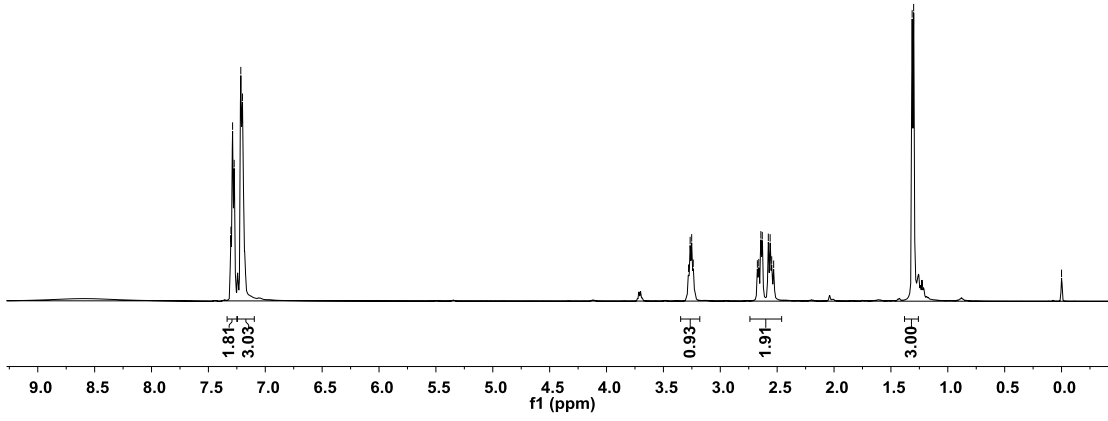

to chen

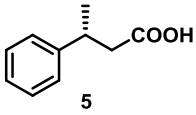

178.845

145.811

128.836

126.986

126.759

77.554

77.300

77.046

42.988

36.454

22.102

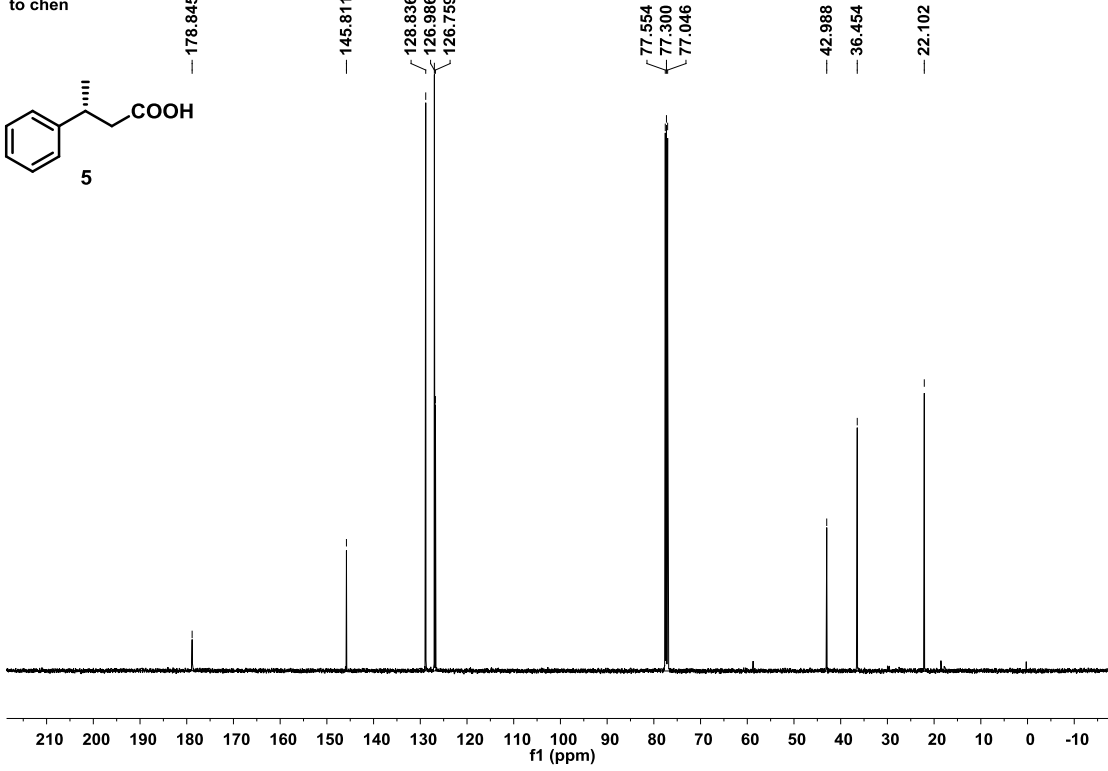

# HPLC and GC Spectra

Analysis Method : E:\DATA\CCY\CCY-5-197\CCY-5-197 2015-06-26 15-58-10\VWD-OJ(1-6)-99-1-1ML-205NM-20MIN.M (Sequence Method)

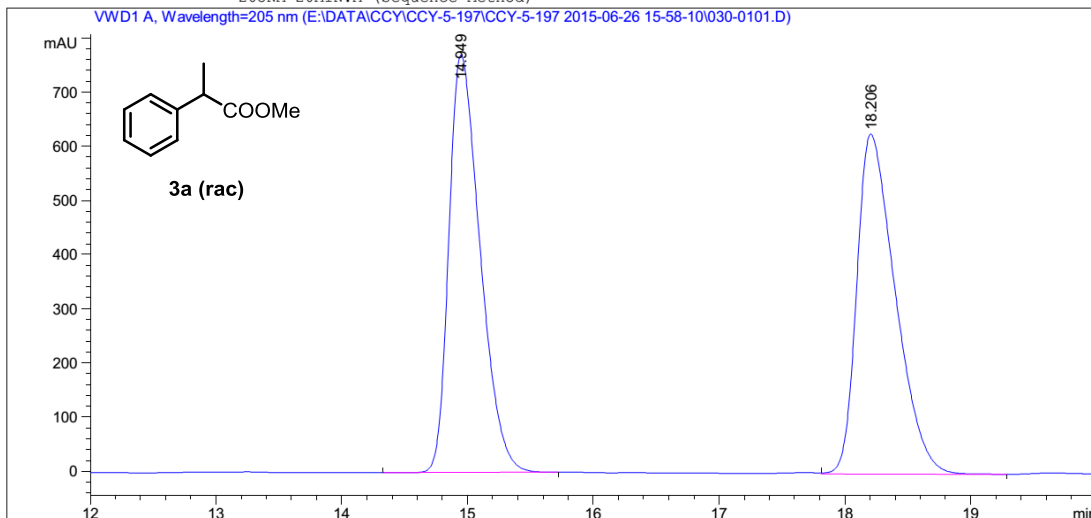

Signal 1: VWD1 A, Wavelength=205 nm

| Peak # | RetTime [min] | Type | Width [min] | Area [mAU*s] | Height [mAU] | Area %  |
|--------|---------------|------|-------------|--------------|--------------|---------|
| 1      | 14.949        | BB   | 0.2651      | 1.32967e4    | 771.43469    | 49.9510 |
| 2      | 18.206        | VB   | 0.3237      | 1.33228e4    | 627.53394    | 50.0490 |

Totals : 2.66195e4 1398.96863

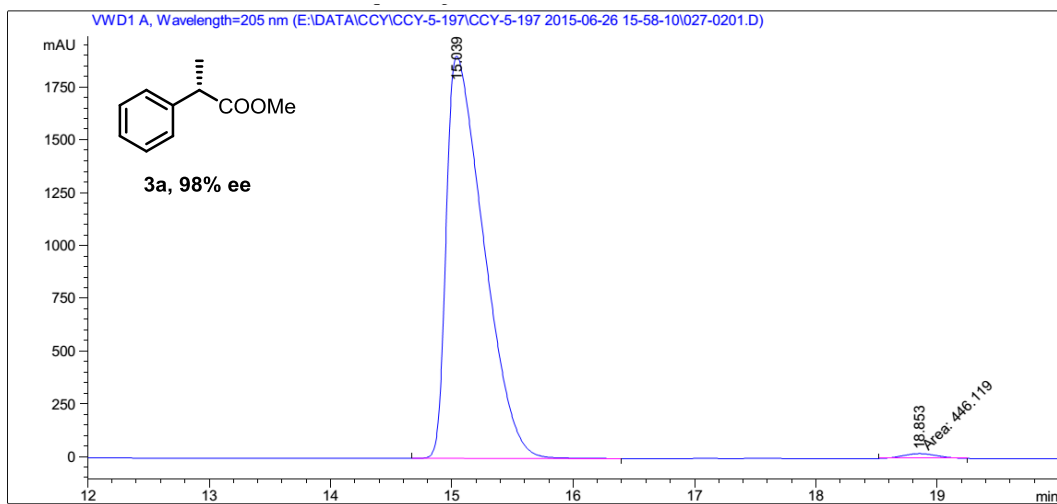

Signal 1: VWD1 A, Wavelength=205 nm

| Peak # | RetTime [min] | Type | Width [min] | Area [mAU*s] | Height [mAU] | Area %  |
|--------|---------------|------|-------------|--------------|--------------|---------|
| 1      | 15.039        | BB   | 0.3293      | 4.05055e4    | 1902.95129   | 98.9106 |
| 2      | 18.853        | MM   | 0.3253      | 446.11923    | 22.85547     | 1.0894  |

Totals : 4.09516e4 1925.80677



Analysis Method : E:\DATA\CCY\CCY-6-20\CCY-6-20 2015-08-01 09-15-34\DAD-OJ(1-6)-99-1-1.0ML-210-254-25MIN.M (Sequence Method)

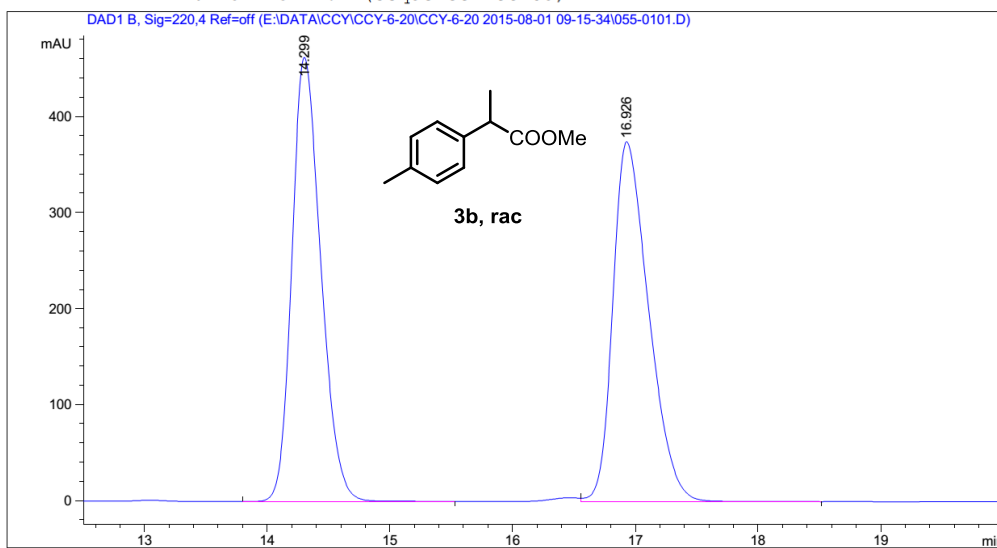

Signal 1: DAD1 B, Sig=220,4 Ref=off

| Peak # | RetTime [min] | Type | Width [min] | Area [mAU*s] | Height [mAU] | Area %  |
|--------|---------------|------|-------------|--------------|--------------|---------|
| 1      | 14.299        | BB   | 0.2530      | 7573.33154   | 462.63379    | 49.9295 |
| 2      | 16.926        | VB   | 0.3083      | 7594.71289   | 374.90457    | 50.0705 |

Totals : 1.51680e4 837.53836

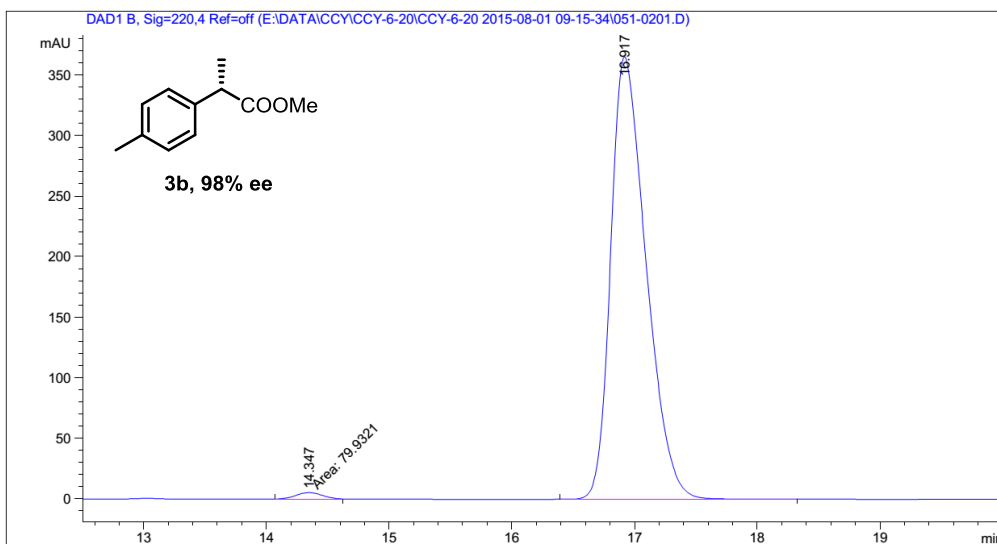

Signal 1: DAD1 B, Sig=220,4 Ref=off

| Peak # | RetTime [min] | Type | Width [min] | Area [mAU*s] | Height [mAU] | Area %  |
|--------|---------------|------|-------------|--------------|--------------|---------|
| 1      | 14.347        | MM   | 0.2497      | 79.93214     | 5.33452      | 1.0815  |
| 2      | 16.917        | BB   | 0.3054      | 7310.85742   | 365.45529    | 98.9185 |

Totals : 7390.78956 370.78981

Analysis Method : E:\DATA\CCY\CCY-6-13\CCY-6-13A 2015-07-30 15-17-04\DAD-OJ(1-6)-99-1-1.0ML-210-254-25MIN.M (Sequence Method)

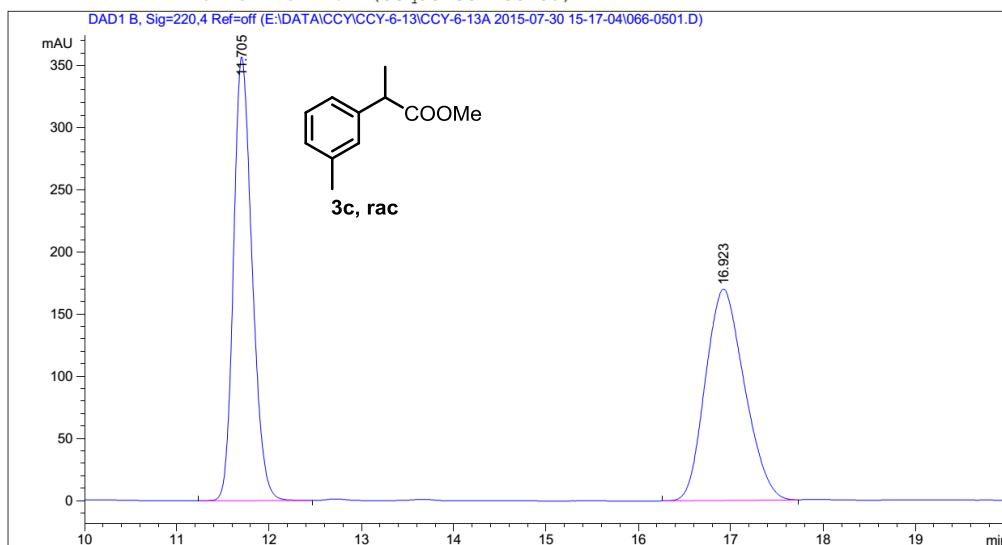

Signal 1: DAD1 B, Sig=220,4 Ref=off

| Peak # | RetTime [min] | Type | Width [min] | Area [mAU*s] | Height [mAU] | Area %  |
|--------|---------------|------|-------------|--------------|--------------|---------|
| 1      | 11.705        | BB   | 0.2149      | 4983.80322   | 356.84039    | 49.9957 |
| 2      | 16.923        | BB   | 0.4602      | 4984.65430   | 169.92957    | 50.0043 |

Totals : 9968.45752 526.76996

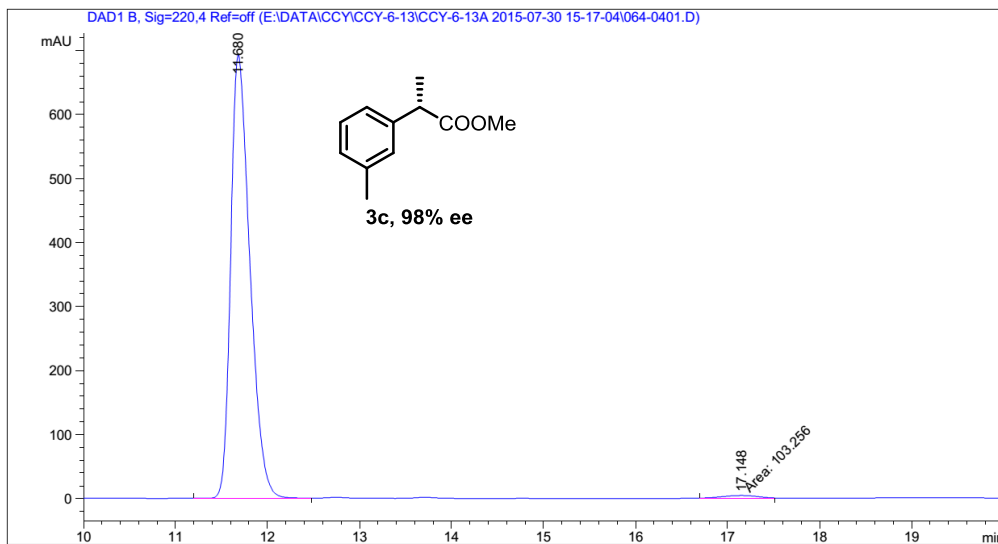

Signal 1: DAD1 B, Sig=220,4 Ref=off

| Peak # | RetTime [min] | Type | Width [min] | Area [mAU*s] | Height [mAU] | Area %  |
|--------|---------------|------|-------------|--------------|--------------|---------|
| 1      | 11.680        | BB   | 0.2206      | 1.00144e4    | 692.77075    | 98.9794 |
| 2      | 17.148        | MM   | 0.4205      | 103.25599    | 4.09267      | 1.0206  |

Totals : 1.01177e4 696.86342

Analysis Method : E:\DATA\CCY\CCY-6-27\CCY-6-27 2015-08-06 09-06-01\DAD-OJ(1-6)-99-1-1.0ML-210-254-25MIN.M (Sequence Method)

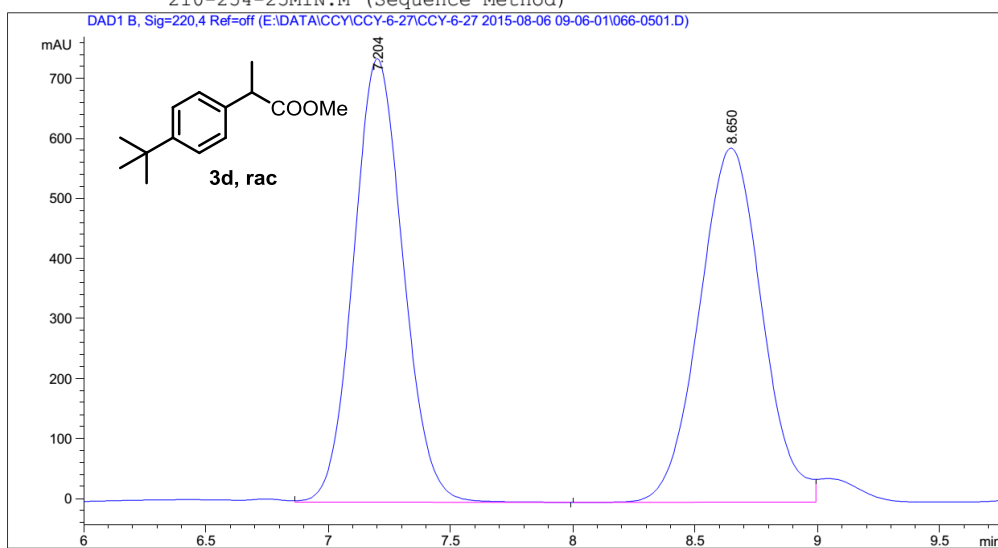

Signal 1: DAD1 B, Sig=220,4 Ref=off

| Peak # | RetTime [min] | Type | Width [min] | Area [mAU*s] | Height [mAU] | Area %  |
|--------|---------------|------|-------------|--------------|--------------|---------|
| 1      | 7.204         | VB   | 0.2182      | 1.04017e4    | 739.05127    | 49.7660 |
| 2      | 8.650         | BV   | 0.2775      | 1.04995e4    | 590.20929    | 50.2340 |

Totals : 2.09012e4 1329.26056

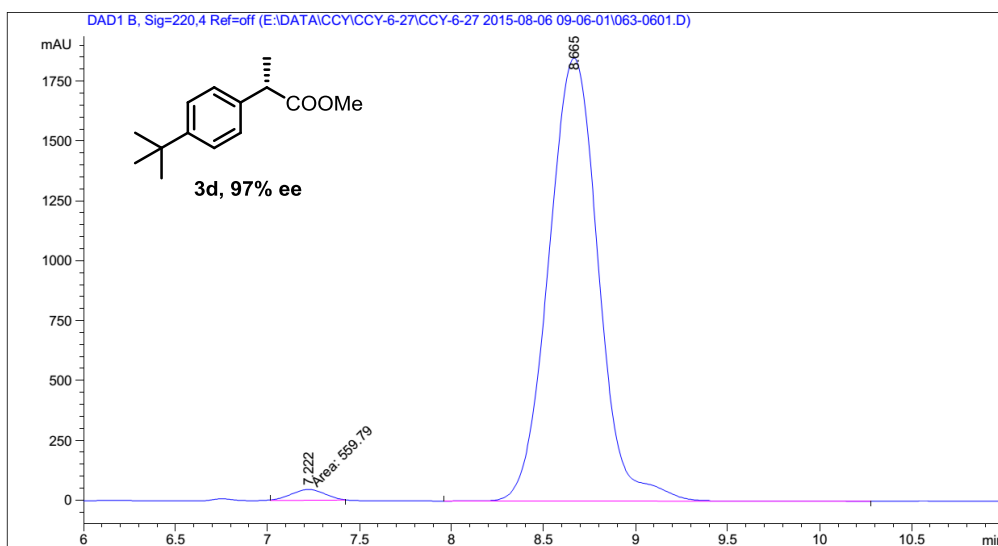

Signal 1: DAD1 B, Sig=220,4 Ref=off

| Peak # | RetTime [min] | Type | Width [min] | Area [mAU*s] | Height [mAU] | Area %  |
|--------|---------------|------|-------------|--------------|--------------|---------|
| 1      | 7.222         | MM   | 0.2103      | 559.78986    | 44.36273     | 1.5895  |
| 2      | 8.665         | BB   | 0.2925      | 3.46586e4    | 1850.28870   | 98.4105 |

Totals : 3.52184e4 1894.65142

Analysis Method : E:\DATA\CCY\CCY-6-13\CCY-6-13A 2015-07-30 15-17-04\DAD-OJ(1-6)-99-1-1.0ML-210-254-25MIN.M (Sequence Method)

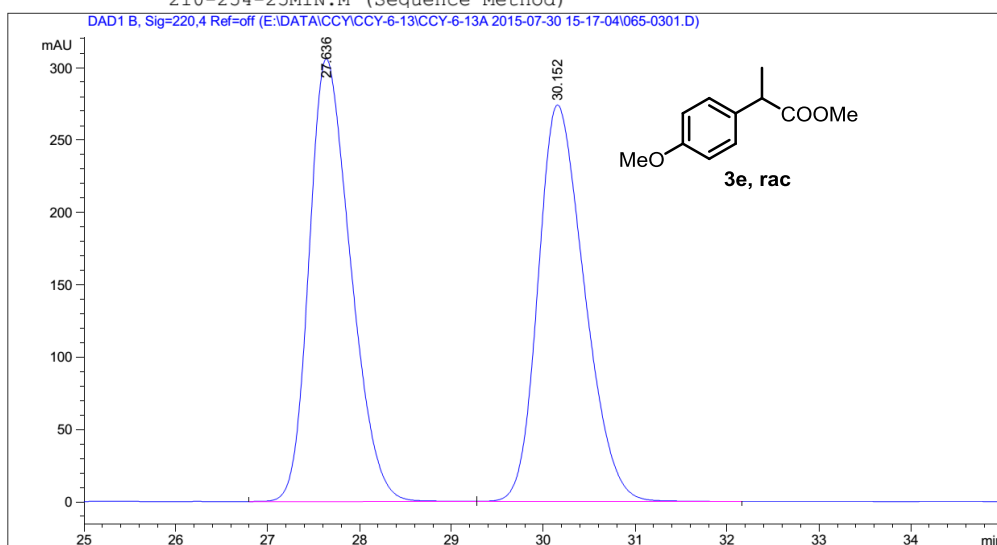

Signal 1: DAD1 B, Sig=220,4 Ref=off

| Peak # | RetTime [min] | Type | Width [min] | Area [mAU*s] | Height [mAU] | Area %  |
|--------|---------------|------|-------------|--------------|--------------|---------|
| 1      | 27.636        | BB   | 0.4834      | 9577.51270   | 305.78653    | 49.9969 |
| 2      | 30.152        | BB   | 0.5380      | 9578.70313   | 273.88351    | 50.0031 |

Totals : 1.91562e4 579.67004

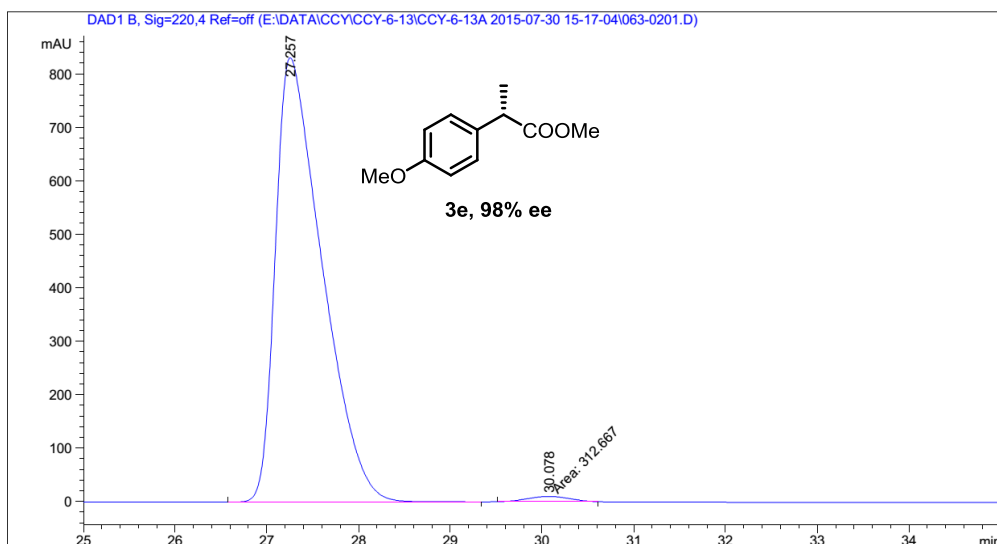

Signal 1: DAD1 B, Sig=220,4 Ref=off

| Peak # | RetTime [min] | Type | Width [min] | Area [mAU*s] | Height [mAU] | Area %  |
|--------|---------------|------|-------------|--------------|--------------|---------|
| 1      | 27.257        | BB   | 0.5282      | 2.93625e4    | 831.09302    | 98.9464 |
| 2      | 30.078        | MM   | 0.5265      | 312.66672    | 9.89798      | 1.0536  |

Totals : 2.96752e4 840.99099

Analysis Method : E:\DATA\GM\GAOMIN20150725\GAOMIN20150725OJ 2015-07-25 16-49-07\DAD-OJ(1-6)-99-1-1.0ML-210-254-25MIN.M (Sequence Method)

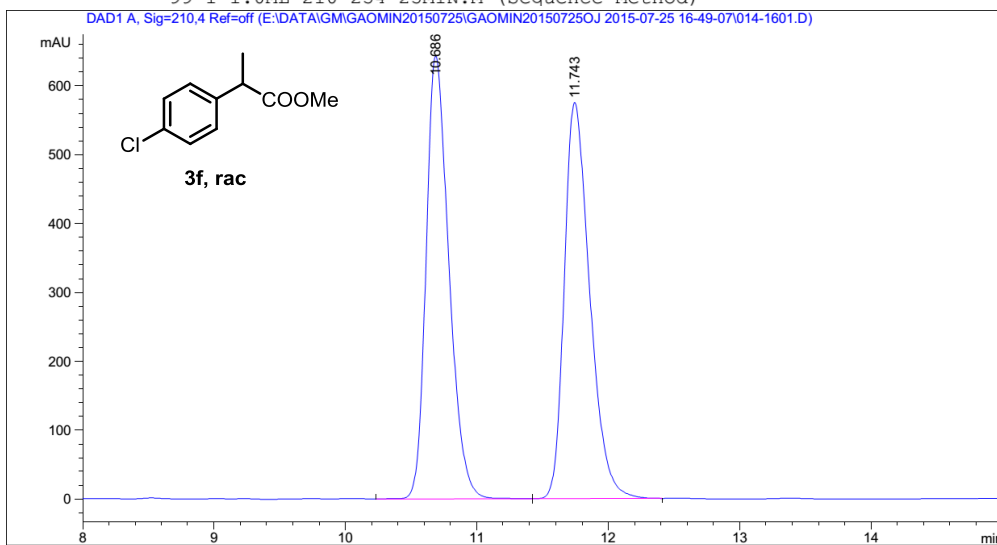

Signal 1: DAD1 A, Sig=210,4 Ref=off

| Peak # | RetTime [min] | Type | Width [min] | Area [mAU*s] | Height [mAU] | Area %  |
|--------|---------------|------|-------------|--------------|--------------|---------|
| 1      | 10.686        | BB   | 0.1847      | 7755.68506   | 642.89801    | 50.0583 |
| 2      | 11.743        | BB   | 0.2048      | 7737.62402   | 575.71167    | 49.9417 |

Totals : 1.54933e4 1218.60968

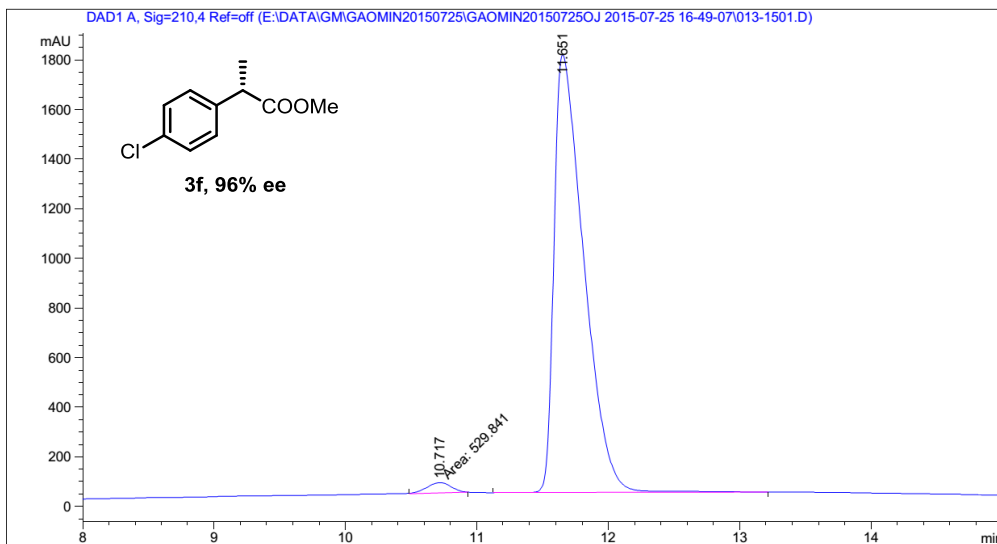

Signal 1: DAD1 A, Sig=210,4 Ref=off

| Peak # | RetTime [min] | Type | Width [min] | Area [mAU*s] | Height [mAU] | Area %  |
|--------|---------------|------|-------------|--------------|--------------|---------|
| 1      | 10.717        | MM   | 0.2130      | 529.84058    | 41.46698     | 1.8751  |
| 2      | 11.651        | BB   | 0.2394      | 2.77274e4    | 1763.71790   | 98.1249 |

Totals : 2.82572e4 1805.18487

Analysis Method : E:\DATA\CCY\CCY-6-34\CCY-6-34 2015-08-27 19-40-29\VWD-OJ(1-6)-99-1-1.0ML-210NM-30MIN.M (Sequence Method)

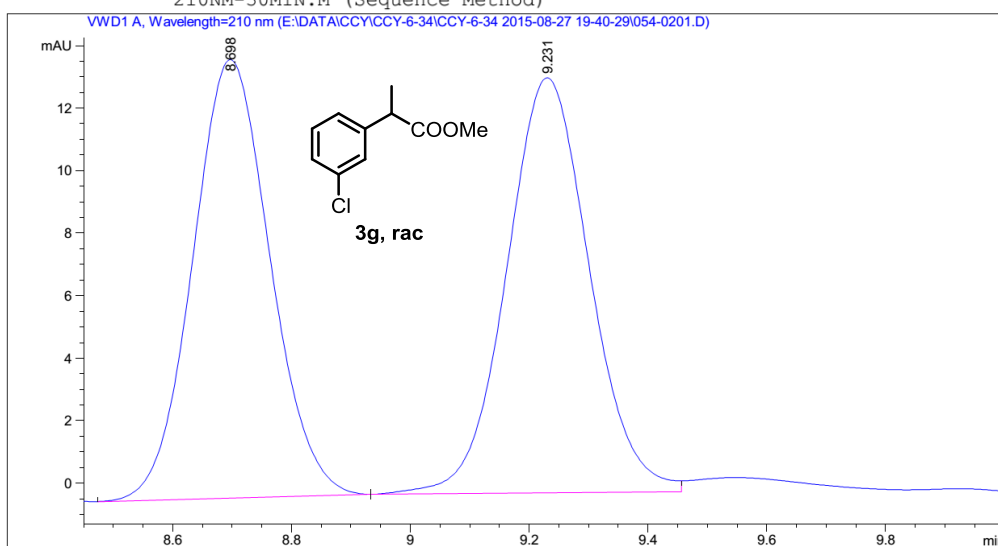

Signal 1: VWD1 A, Wavelength=210 nm

| Peak # | RetTime [min] | Type | Width [min] | Area [mAU*s] | Height [mAU] | Area %  |
|--------|---------------|------|-------------|--------------|--------------|---------|
| 1      | 8.698         | BB   | 0.1402      | 126.51311    | 14.03487     | 49.6177 |
| 2      | 9.231         | BV   | 0.1498      | 128.46265    | 13.28364     | 50.3823 |

Totals : 254.97576 27.31851

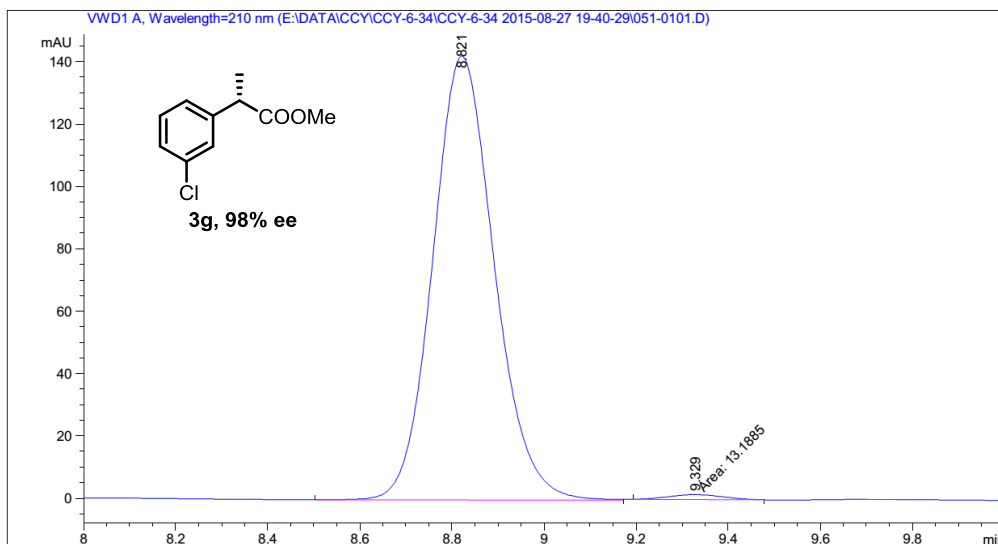

Signal 1: VWD1 A, Wavelength=210 nm

| Peak # | RetTime [min] | Type | Width [min] | Area [mAU*s] | Height [mAU] | Area %  |
|--------|---------------|------|-------------|--------------|--------------|---------|
| 1      | 8.821         | BV   | 0.1421      | 1319.13843   | 142.33096    | 99.0101 |
| 2      | 9.329         | MM   | 0.1401      | 13.18855     | 1.56934      | 0.9899  |

Totals : 1332.32698 143.90031

Analysis Method : E:\DATA\CCY\CCY-6-27\CCY-6-27 2015-08-06 09-06-01\DAD-OJ(1-6)-99-1-1.0ML-210-254-25MIN.M (Sequence Method)

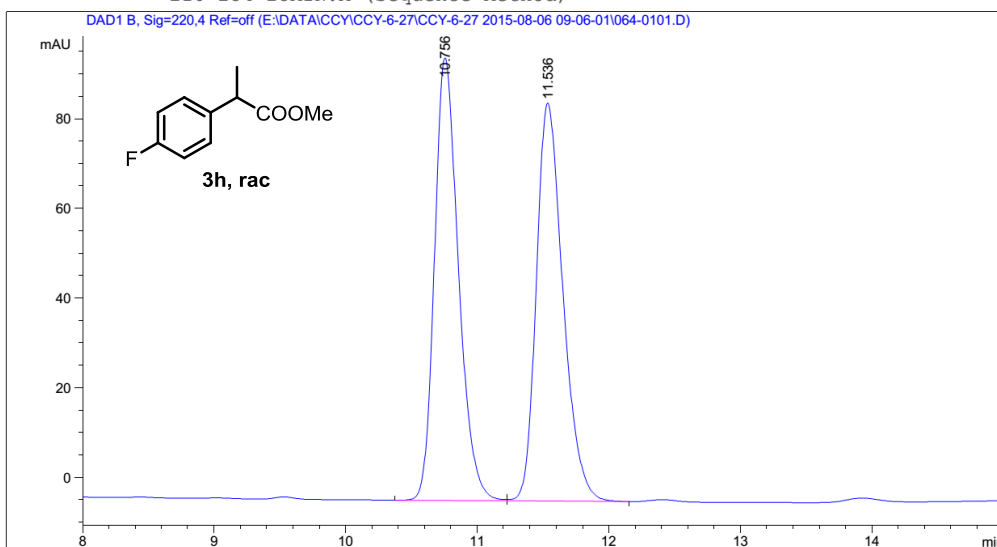

Signal 1: DAD1 B, Sig=220,4 Ref=off

| Peak # | RetTime [min] | Type | Width [min] | Area [mAU*s] | Height [mAU] | Area %  |
|--------|---------------|------|-------------|--------------|--------------|---------|
| 1      | 10.756        | BV   | 0.1937      | 1249.49084   | 98.69353     | 50.0773 |
| 2      | 11.536        | VB   | 0.2156      | 1245.63208   | 88.82416     | 49.9227 |

Totals : 2495.12292 187.51769

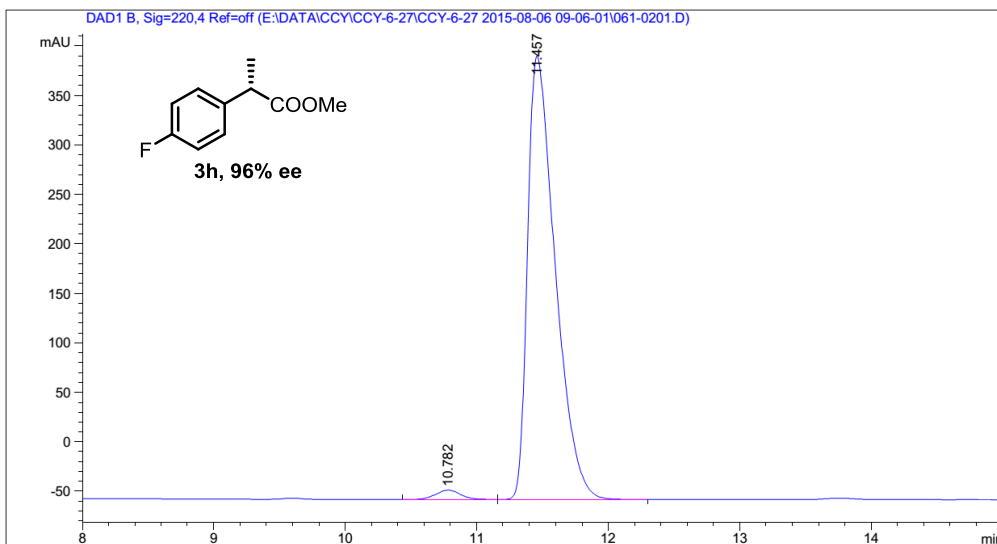

Signal 1: DAD1 B, Sig=220,4 Ref=off

| Peak # | RetTime [min] | Type | Width [min] | Area [mAU*s] | Height [mAU] | Area %  |
|--------|---------------|------|-------------|--------------|--------------|---------|
| 1      | 10.782        | BB   | 0.1985      | 127.03754    | 9.59172      | 1.9083  |
| 2      | 11.457        | BB   | 0.2219      | 6530.15576   | 448.41965    | 98.0917 |

Totals : 6657.19330 458.01137

### <Sample Information>

Sample Name : ccy-5-205-7  
Sample ID :  
Data Filename : ccy-5-205-7.gcd  
Method Filename : b-dex225-250-80-220-260-70min.gcm

### <Chromatogram>

uV

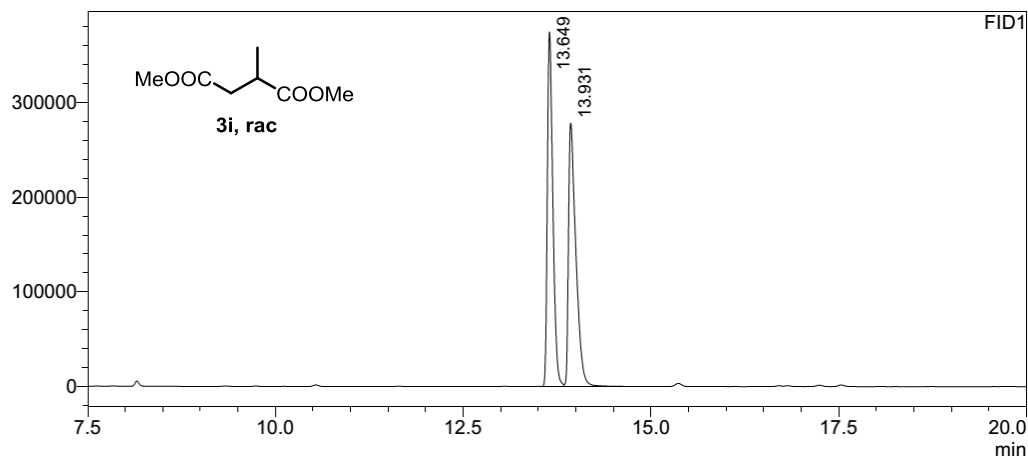

### <Peak Table>

| Peak# | Ret. Time | Area    | Height | Conc.  | Unit | Mark | Name |
|-------|-----------|---------|--------|--------|------|------|------|
| 1     | 13.649    | 1917091 | 374530 | 50.065 |      |      |      |
| 2     | 13.931    | 1912150 | 277825 | 49.935 |      | SV   |      |
| Total |           | 3829241 | 652354 |        |      |      |      |

### <Sample Information>

Sample Name : ccy-5-205-4  
Sample ID :  
Data Filename : ccy-5-205-4.gcd  
Method Filename : b-dex225-250-80-220-260-70min.gcm

### <Chromatogram>

uV

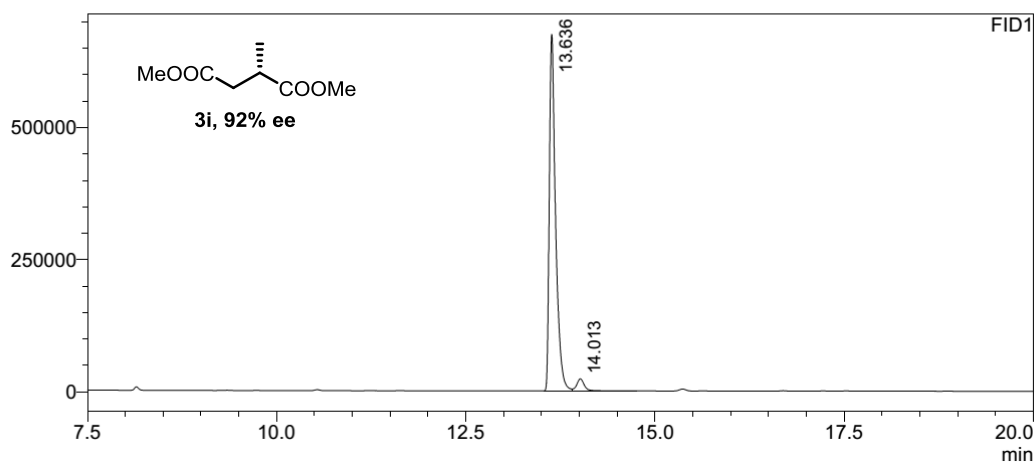

### <Peak Table>

| Peak# | Ret. Time | Area    | Height | Conc.  | Unit | Mark | Name |
|-------|-----------|---------|--------|--------|------|------|------|
| 1     | 13.636    | 3894209 | 673999 | 95.903 |      | V    |      |
| 2     | 14.013    | 166372  | 23066  | 4.097  |      | SV   |      |
| Total |           | 4060580 | 697065 |        |      |      |      |



Analysis Method : E:\DATA\CCY\CCY-5-204-205\DX20150628-ZXB-33-34-VWD-OJ(1-6)-95-5 2015-07-07  
 09-41-18\VWD-OJ(1-6)-99-1-1ML-205NM-20MIN.M (Sequence Method)

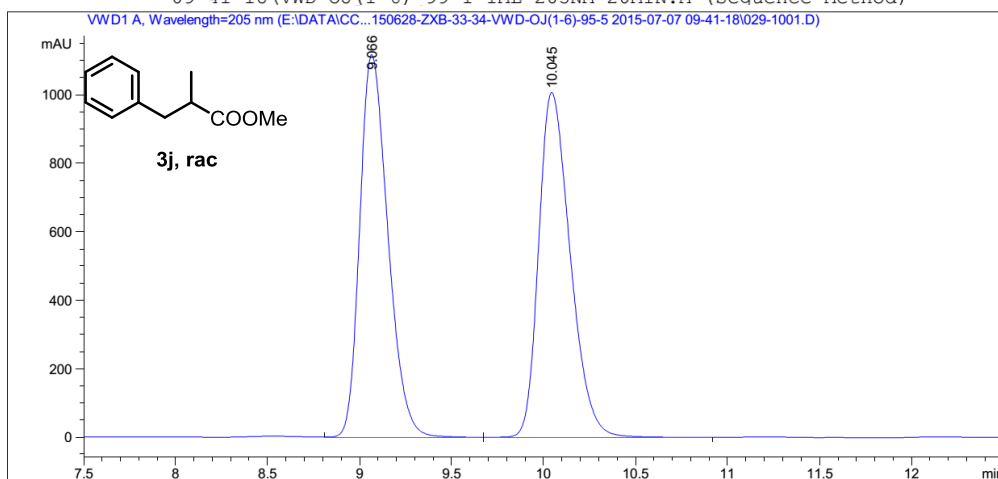

Signal 1: VWD1 A, Wavelength=205 nm

| Peak # | RetTime [min] | Type | Width [min] | Area [mAU*s] | Height [mAU] | Area %  |
|--------|---------------|------|-------------|--------------|--------------|---------|
| 1      | 9.066         | VB   | 0.1639      | 1.18696e4    | 1117.72522   | 49.6954 |
| 2      | 10.045        | BB   | 0.1841      | 1.20151e4    | 1008.02130   | 50.3046 |

Totals : 2.38846e4 2125.74652

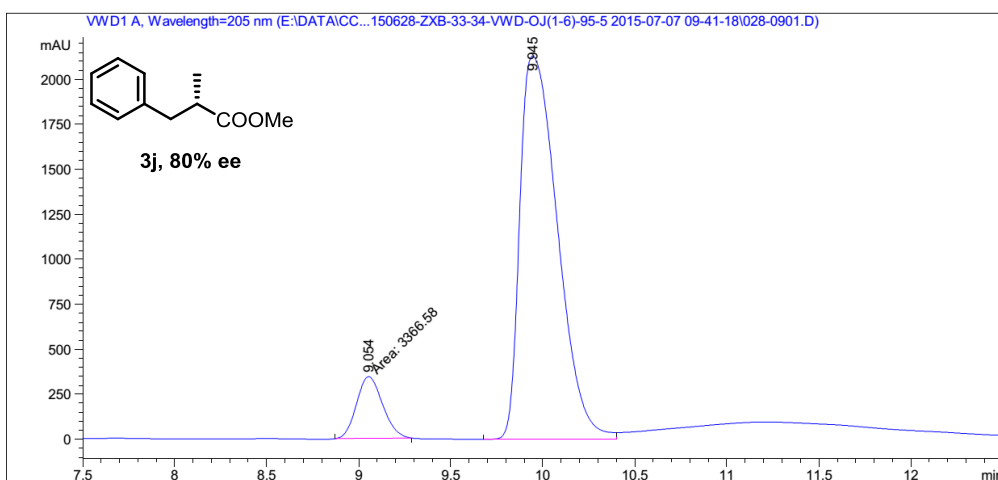

Signal 1: VWD1 A, Wavelength=205 nm

| Peak # | RetTime [min] | Type | Width [min] | Area [mAU*s] | Height [mAU] | Area %  |
|--------|---------------|------|-------------|--------------|--------------|---------|
| 1      | 9.054         | MM   | 0.1635      | 3366.58398   | 343.21301    | 9.9904  |
| 2      | 9.945         | BV   | 0.2251      | 3.03318e4    | 2130.07104   | 90.0096 |

Totals : 3.36984e4 2473.28406

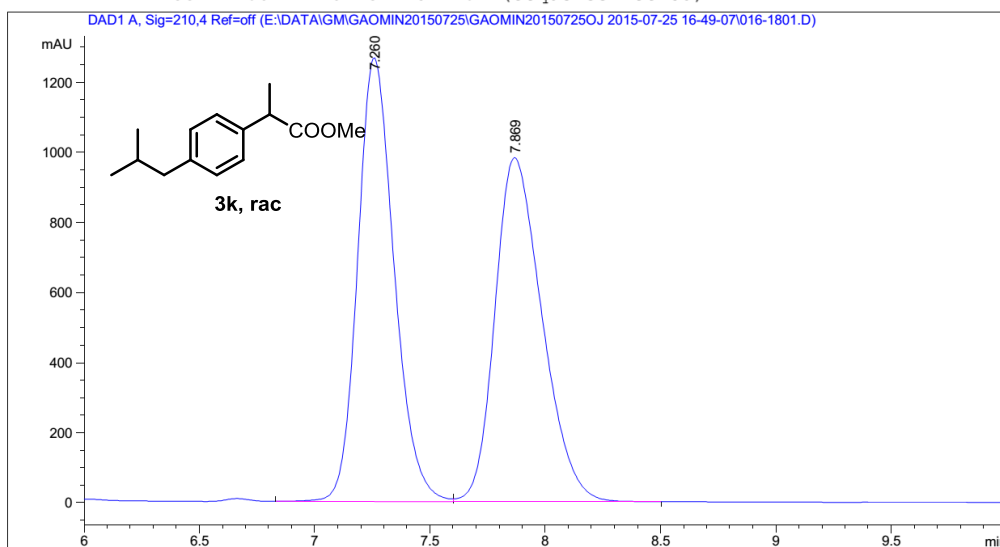

Signal 1: DAD1 A, Sig=210,4 Ref=off

| Peak # | RetTime [min] | Type | Width [min] | Area [mAU*s] | Height [mAU] | Area %  |
|--------|---------------|------|-------------|--------------|--------------|---------|
| 1      | 7.260         | BV   | 0.1703      | 1.39336e4    | 1266.96326   | 50.0365 |
| 2      | 7.869         | VB   | 0.2193      | 1.39132e4    | 982.13269    | 49.9635 |

Totals : 2.78468e4 2249.09595

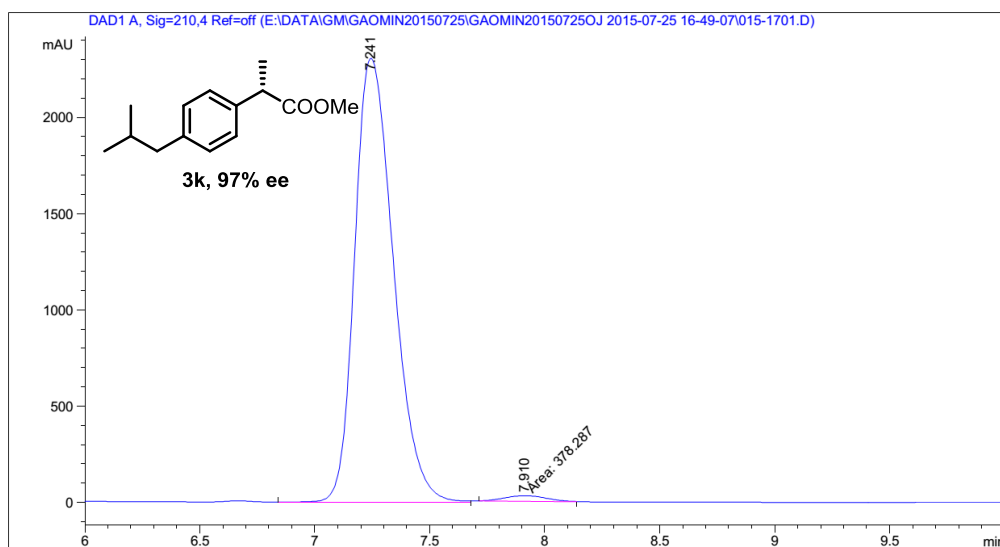

Signal 1: DAD1 A, Sig=210,4 Ref=off

| Peak # | RetTime [min] | Type | Width [min] | Area [mAU*s] | Height [mAU] | Area %  |
|--------|---------------|------|-------------|--------------|--------------|---------|
| 1      | 7.241         | BV   | 0.1804      | 2.69508e4    | 2304.97705   | 98.6158 |
| 2      | 7.910         | MM   | 0.2144      | 378.28711    | 29.40901     | 1.3842  |

Totals : 2.73291e4 2334.38606

Analysis Method : E:\DATA\CCY\CCY-6-34\CCY-6-34 2015-08-27 19-40-29\VWD-OJ(1-6)-90-10-1.0ML-210NM-40MIN.M (Sequence Method)

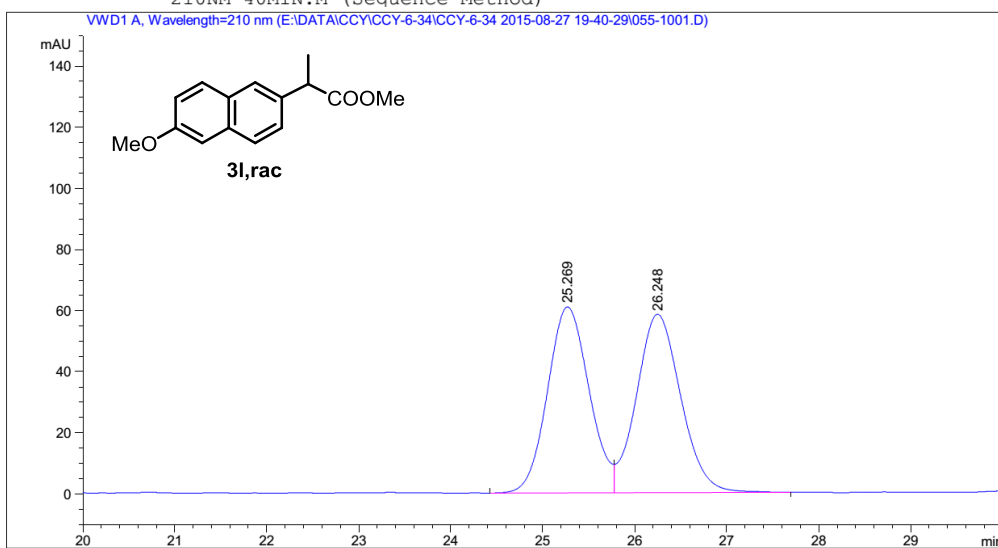

Signal 1: VWD1 A, Wavelength=210 nm

| Peak # | RetTime [min] | Type | Width [min] | Area [mAU*s] | Height [mAU] | Area %  |
|--------|---------------|------|-------------|--------------|--------------|---------|
| 1      | 25.269        | BV   | 0.4861      | 1909.86865   | 60.86845     | 49.4233 |
| 2      | 26.248        | VB   | 0.5143      | 1954.44250   | 58.41681     | 50.5767 |

Totals : 3864.31116 119.28525

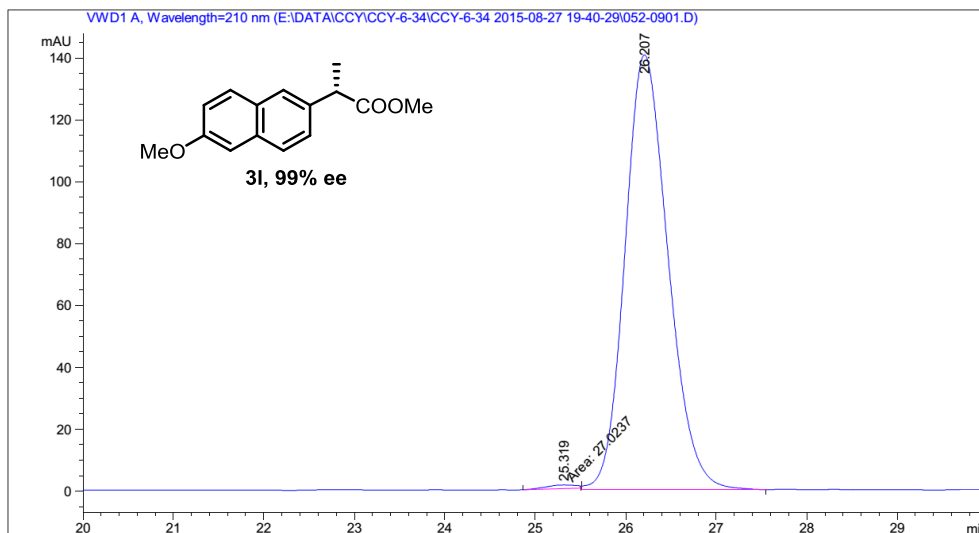

Signal 1: VWD1 A, Wavelength=210 nm

| Peak # | RetTime [min] | Type | Width [min] | Area [mAU*s] | Height [mAU] | Area %  |
|--------|---------------|------|-------------|--------------|--------------|---------|
| 1      | 25.319        | MM   | 0.3943      | 27.02372     | 1.14234      | 0.5766  |
| 2      | 26.207        | VB   | 0.5129      | 4659.44189   | 140.49760    | 99.4234 |

Totals : 4686.46562 141.63995

### <Sample Information>

Sample Name : ccy-6-72-2  
Sample ID :  
Data Filename : ccy-6-72-2.gcd  
Method Filename : CB-230-6=90-190-240-30min.gcm

### <Chromatogram>

uV

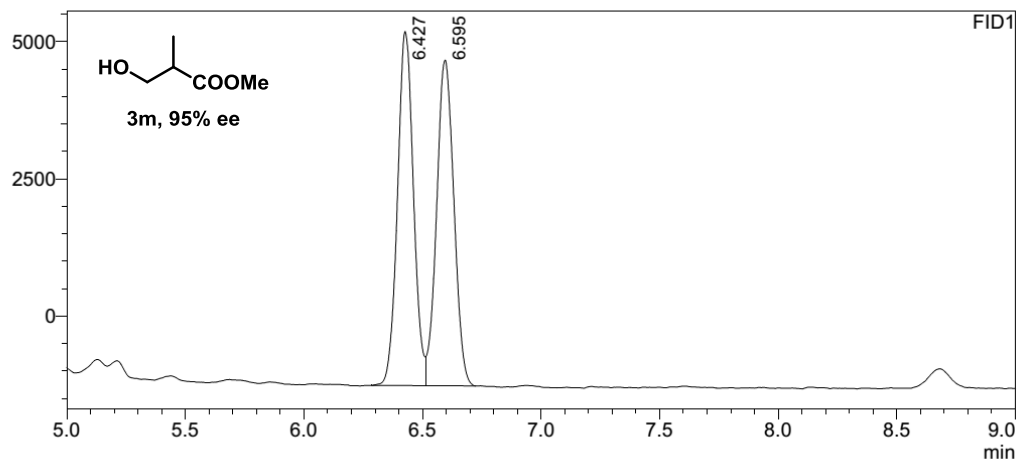

### <Peak Table>

FID1

| Peak# | Ret. Time | Area  | Height | Conc.  | Unit | Mark | Name |
|-------|-----------|-------|--------|--------|------|------|------|
| 1     | 6.427     | 30264 | 6416   | 50.201 |      |      |      |
| 2     | 6.595     | 30022 | 5916   | 49.799 |      | V    |      |
| Total |           | 60286 | 12331  |        |      |      |      |

### <Sample Information>

Sample Name : ccy-6-72-1  
Sample ID :  
Data Filename : ccy-6-72-1.gcd  
Method Filename : CB-230-6=90-190-240-30min.gcm

### <Chromatogram>

uV

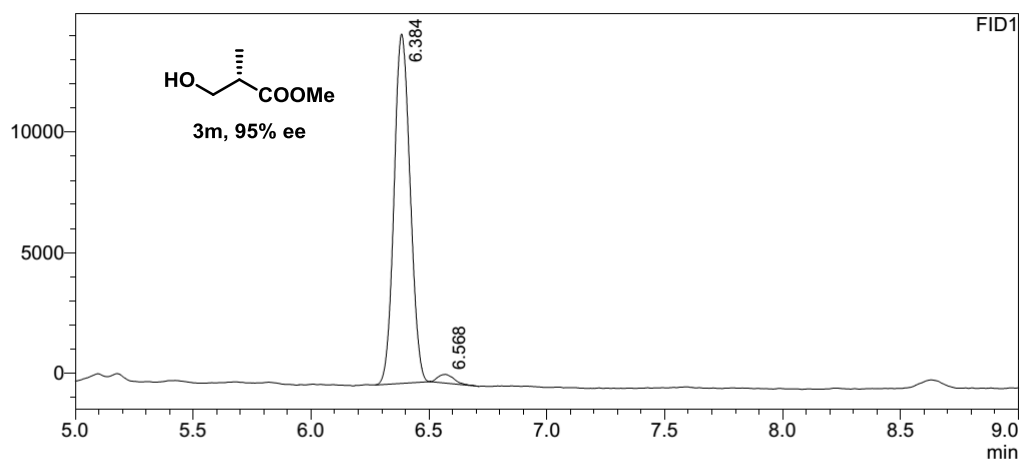

### <Peak Table>

FID1

| Peak# | Ret. Time | Area  | Height | Conc.  | Unit | Mark | Name |
|-------|-----------|-------|--------|--------|------|------|------|
| 1     | 6.384     | 68848 | 14458  | 97.609 |      |      |      |
| 2     | 6.568     | 1687  | 356    | 2.391  |      | M    |      |
| Total |           | 70534 | 14814  |        |      |      |      |

## References

1. (a) S. Ghosh, S. N. Pardo, R. G. Salomon, *J. Org. Chem.*, **1982**, *47*, 4693; (b) F. X. Felpin, K. Miqueu, J. M. Sotiropoulos, E. Fouquet, O. Ibarguren, J. Laudien, *Chem. Eur. J.*, **2010**, *16*, 5191.
2. R. R. Kurtz, D. J. Houser, *J. Org. Chem.*, **1981**, *46*, 202.
3. F. Bellezza, A. Cipiciani, G. Ricci, R. Ruzziconi, *Tetrahedron*, **2005**, *61*, 8005
4. T. Mendgen, T. Scholz, C. D. Klein, *Bioorg. Med. Chem. Lett.* **2010**, *20*, 5757
5. A. Takemiya, J. F. Hartwig, *J. Am. Chem. Soc.*, **2006**, *128*, 6042.
6. X. Sun, L. Zhou, C.-J. Wang, X. Zhang, *Angew. Chem. Int. Ed.*, 2007, **46**, 2623.
7. S.-F. Zhu, Y.-B. Yu, S. Li, L.-X. Wang, Q.-L. Zhou, *Angew. Chem. Int. Ed.*, 2012, **51**, 8872.
8. E. Boyd, E. Coulbeck, G. S. Coumbarides, S. Chavda, M. Dingjan, J. Eames, A. Flinn, M. Motevalli, J. Northend, Y. Yohannes, *Tetrahedron: Asymmetry*, 2007, **18**, 2515.
9. Z.-L. Wu, Z.-Y. Li, *Tetrahedron: Asymmetry*, 2001, **12**, 3305.
10. O. Hiromichi, *Jpn. Kokai Tokkyo Koho*, 1993, JP 05176778 A 19930720.
11. O. Piccolo, F. Spreafico, G. Visentin, *J. Org. Chem.*, 1987, **52**, 10.
12. C. E. Stivala, A. Zakarian, *J. Am. Chem. Soc.*, **2011**, *133*, 11936.
13. P. C. B. Page, M. J. McKenzie, S. M. Allin, S. S. Klair, *Tetrahedron*. **1997**, *53*, 13149.
14. S. Wang, Z. Wang, L. Yang, J. Dong, C. Chi, D. Sui, Y. Wang, J. Ren, M. Hung, Y. Jiang, *Journal of Molecular Catalysis A: Chemical*, **2007**, *264*, 60.
